# Supplementary material for: Associations between use of psychotropic medications and use of hormonal contraception among girls and women aged 15–49 years in Finland: a nationwide, register-based, matched case–control study
Source: PubMed Central journal article supplement — BMJ Open. 2022 Feb 22;12(2):e053837. doi: 10.1136/bmjopen-2021-053837 (PMC8867378; doi:10.1136/bmjopen-2021-053837), 2022-02-22
Supplement: bmjopen-2021-053837.draft_revisions.pdf [file bmjopen-2021-053837.draft_revisions.pdf]

# BMJ Open

BMJ Open is committed to open peer review. As part of this commitment we make the peer review history of every article we publish publicly available.

When an article is published we post the peer reviewers' comments and the authors' responses online. We also post the versions of the paper that were used during peer review. These are the versions that the peer review comments apply to.

The versions of the paper that follow are the versions that were submitted during the peer review process. They are not the versions of record or the final published versions. They should not be cited or distributed as the published version of this manuscript.

BMJ Open is an open access journal and the full, final, typeset and author-corrected version of record of the manuscript is available on our site with no access controls, subscription charges or pay-per-view fees (<http://bmjopen.bmj.com>).

If you have any questions on BMJ Open's open peer review process please email [info.bmjopen@bmj.com](mailto:info.bmjopen@bmj.com)

# BMJ Open

## Psychotropic medications and hormonal contraception - a nationwide register-based study from Finland

|                               |                                                                                                                                                                                                                                                                                                                                                                                                                                                               |
|-------------------------------|---------------------------------------------------------------------------------------------------------------------------------------------------------------------------------------------------------------------------------------------------------------------------------------------------------------------------------------------------------------------------------------------------------------------------------------------------------------|
| Journal:                      | <i>BMJ Open</i>                                                                                                                                                                                                                                                                                                                                                                                                                                               |
| Manuscript ID                 | bmjopen-2021-053837                                                                                                                                                                                                                                                                                                                                                                                                                                           |
| Article Type:                 | Original research                                                                                                                                                                                                                                                                                                                                                                                                                                             |
| Date Submitted by the Author: | 26-May-2021                                                                                                                                                                                                                                                                                                                                                                                                                                                   |
| Complete List of Authors:     | Toffol, Elena; University of Helsinki Faculty of Medicine, Department of Public Health<br>Partonen, Timo; Finnish Institute for Health and Welfare, Department of Public Health and welfare<br>Heikinheimo, Oskari; University of Helsinki Faculty of Medicine, Obstetrics and Gynaecology<br>But, Anna; University of Helsinki, Department of Public Health<br>Latvala, Antti; University of Helsinki<br>Haukka, Jari; University of Helsinki, Public Health |
| Keywords:                     | PSYCHIATRY, PUBLIC HEALTH, Reproductive medicine < GYNAECOLOGY                                                                                                                                                                                                                                                                                                                                                                                                |
|                               |                                                                                                                                                                                                                                                                                                                                                                                                                                                               |

SCHOLARONE™  
Manuscripts

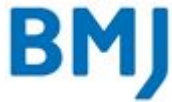

I, the Submitting Author has the right to grant and does grant on behalf of all authors of the Work (as defined in the below author licence), an exclusive licence and/or a non-exclusive licence for contributions from authors who are: i) UK Crown employees; ii) where BMJ has agreed a CC-BY licence shall apply, and/or iii) in accordance with the terms applicable for US Federal Government officers or employees acting as part of their official duties; on a worldwide, perpetual, irrevocable, royalty-free basis to BMJ Publishing Group Ltd ("BMJ") its licensees and where the relevant Journal is co-owned by BMJ to the co-owners of the Journal, to publish the Work in this journal and any other BMJ products and to exploit all rights, as set out in our [licence](#).

The Submitting Author accepts and understands that any supply made under these terms is made by BMJ to the Submitting Author unless you are acting as an employee on behalf of your employer or a postgraduate student of an affiliated institution which is paying any applicable article publishing charge ("APC") for Open Access articles. Where the Submitting Author wishes to make the Work available on an Open Access basis (and intends to pay the relevant APC), the terms of reuse of such Open Access shall be governed by a Creative Commons licence – details of these licences and which [Creative Commons](#) licence will apply to this Work are set out in our licence referred to above.

Other than as permitted in any relevant BMJ Author's Self Archiving Policies, I confirm this Work has not been accepted for publication elsewhere, is not being considered for publication elsewhere and does not duplicate material already published. I confirm all authors consent to publication of this Work and authorise the granting of this licence.

1  
2  
3 **Psychotropic medications and hormonal contraception - a nationwide register-based study**  
4 **from Finland**

5  
6 Elena Toffol,<sup>1</sup> Timo Partonen,<sup>2</sup> Oskari Heikinheimo,<sup>3</sup> Anna But,<sup>1</sup> Antti Latvala,<sup>4</sup> Jari Haukka<sup>1,5</sup>  
7  
8

9  
10 <sup>1</sup> Department of Public Health, Clinicum, Faculty of Medicine, University of Helsinki, Helsinki,  
11 Finland  
12

13 <sup>2</sup> Equality Unit, Department of Public Health and Welfare, Finnish Institute for Health and Welfare,  
14 Helsinki, Finland  
15

16 <sup>3</sup> Department of Obstetrics and Gynecology, University of Helsinki and Helsinki University  
17 Hospital, Helsinki, Finland  
18

19 <sup>4</sup> Institute of Criminology and Legal Policy, University of Helsinki, Helsinki, Finland  
20

21 <sup>5</sup> Faculty of Medicine and Health Technology, Tampere University, Finland  
22  
23  
24  
25  
26  
27  
28  
29  
30  
31

32 **Correspondence to:** Dr. Elena Toffol, Department of Public Health, Clinicum, University of  
33 Helsinki, Helsinki, Finland, elena.toffol@helsinki.fi  
34  
35  
36  
37  
38  
39  
40  
41  
42  
43

44 **Word count:** 3298  
45  
46  
47  
48  
49  
50  
51  
52  
53  
54  
55  
56  
57  
58  
59  
60

## Abstract

**Objectives.** To examine whether mental disorders, as indicated by the current and past use of psychotropic medications, are associated with the use and type of hormonal contraception (HC).

**Design.** Nationwide register-based matched case-control study.

**Settings.** All fertile-aged women living in Finland in 2017; data from the Medical Birth Register, Population Register Centre, Prescription Centre, Register of Induced Abortions, Care Register of Health Care.

**Participants.** 294,356 women living in Finland with a redeemed prescription of HC in 2017, and their same-sized control group of non-users (n=294,356) identified through records in the Prescription Centre.

**Main outcome measures.** Associations between the use of psychotropic medications and the use of HC, and the type of HC tested in logistic regression models.

**Results.** Altogether 19% of the 588,712 women received at least one prescription for a psychotropic medication in 2017, and 4% and 15% were occasional and regular users of psychotropic medications in 2013–2016, respectively. In multivariable logistic regression models both use of psychotropic medications in 2017, and their occasional or regular use between 2013–2016 were associated with higher odds of HC use, even though with small to very small effect sizes (ORs ranging between 1.37 and 1.06, 95% confidence intervals 1.22 to 1.53, and 1.03 to 1.09, respectively). After adjustment for covariates, when fixed combinations of progestogens and estrogens for systemic use was the reference category, women using almost any class of psychotropic medications had higher odds of using other types of HC (such as hormonal intrauterine device, vaginal ring and progestogens for systemic use).

**Conclusions.** Fertile-aged women with current and past use of psychotropic medications have higher odds of using HC in Finland, with a specific pattern in the type of contraceptives used, suggesting adequate access to effective contraception for women with psychiatric disorders.

**Keywords:** women, fertile-age, hormonal contraception, psychotropic medication.

## ARTICLE SUMMARY

### Strengths and limitations of this study

- The studied population is highly representative of all fertile-aged women in Finland.
- The combination of a cross-sectional and longitudinal retrospective design provides stability to psychiatric prescriptions as predictor of interest.
- Levels of use of psychotropic medications were determined through different approaches.
- Women suffering from and seeking help for their psychiatric disorders, and thus receiving a pharmacological treatment, represent a more conscious and healthy subgroup of this population.
- Misclassification of both psychiatric disorders and HC use as based on drug prescription cannot be ruled out.

## INTRODUCTION

The relationship between the use of hormonal contraception (HC) and women's mental health continues to be debated.[1] While ample evidence has been provided showing no associations between the use of contraception and the increased risk of depressive or anxiety disorders,[1-3] findings from recent studies are challenging this view. Recent observations report that women using HC (especially oral contraceptives, OC) have higher odds of depression,[4] and of suicidal behavior,[5,6] with a long-term risk of depression later in adulthood for those who started their OC use during adolescence.[7]

However, while these findings indicate a link between contraceptive use and mental health status, the reverse association is likewise plausible and of public health and clinical relevance. Women suffering from psychiatric disorders seem to have higher risk of unplanned pregnancy and induced abortion, as well as risky sexual behavior including non-use or inconsistent use of contraception,[8-10] or use of less effective contraceptive methods.[11,12] For instance, among teenagers and young women, those with baseline depressive and stress symptoms had higher odds of reporting mood changes, of OC discontinuation, and of inconsistent use of contraception.[13,14] It has been hypothesized that a subgroup of women may be more sensitive to hormonal fluctuations, and thus more prone to develop mood symptoms or disorders in relation to reproductive events (e.g., the premenstrual phase, the postpartum, or the perimenopause),[15] as well as while on contraception.[16] Consequently, women with mental health problems, either because they are more likely to experience mood side effects of HC or to consider their perceived mood changes as caused by HC, are also more likely to discontinue contraception use. In line with these observations, we previously found that a recent care episode for a psychiatric disorder was associated with lower odds of HC use among almost 600,000 women aged 15-49 years in Finland.[17] The study used register records with a psychiatric discharge diagnosis in 2016, thus including only the most severe cases of psychiatric disorders. However, because mild and moderate mental disorders not requiring hospitalization are highly prevalent in the population, the overall relationship between mental health and HC use remains largely unknown. Thus, the aim of this study was to explore the associations between a wide spectrum of psychiatric disorders, as indicated by the current and previous prescriptions of psychotropic medications, and HC use in 2017, in a population inclusive of all fertile-aged women using HC in Finland, and their reference group of non-users. A further aim was to test whether the use of psychotropic medications was associated with the type of HC used.

## METHODS

1  
2  
3 This work is part of a larger register-based study on HC in Finland, described in detail elsewhere.[17]  
4 Briefly, the population was selected on the basis of the unique personal identification number given  
5 at birth or at immigration to each person permanently residing in Finland. The group of HC users,  
6 selected from the Prescription Centre in the Kanta Services,[18] included all fertile-aged women (15–  
7 49 years) with at least one redeemed prescription for HC in 2017 (n=294,445). The same-sized control  
8 group of HC non-users included women, matched by age and municipality of residence, with no  
9 redeemed HC prescriptions in 2017. Altogether 89 women who received a prescription with  
10 Anatomical Therapeutic Chemical (ATC) code “G03AD” (i.e., emergency contraception, which is  
11 usually available without prescription in Finland), and their matched controls, were excluded, leaving  
12 a final population of 588,712 women. As such, the study population included 52% of all fertile-aged  
13 women living in Finland in 2017. The study was approved by the Ethics Committee of the Faculty of  
14 Medicine, University of Helsinki (3/2018). Because this is a register-based study, no individual  
15 consent is needed.  
16  
17  
18  
19  
20  
21  
22  
23  
24  
25  
26

### 27 **The registers**

28  
29 Information on redeemed medications for each person living in Finland is stored in the Prescription  
30 Centre, a centralized database in the Kanta Services. The recorded data include, among others, the  
31 product ATC code, date of prescription and of purchase, and the redeemed amount in defined daily  
32 dose (DDD). In addition to selection of the study population, the Prescription Centre was used to  
33 gather information on redeemed prescriptions for psychotropic medications between 2013 and 2017  
34 for all the study members. Use of psychotropic medications in 2017 was defined as one or more  
35 redeemed prescriptions in the same year. Users of psychotropic medications between 2013 and 2016  
36 were divided into occasional and regular users, defined as women with only one vs. two or more  
37 redeemed prescriptions of the same class drug.  
38  
39  
40  
41  
42  
43

44 The examined HC types included intrauterine device (IUD) with progestogen (i.e., the levonorgestrel-  
45 releasing intrauterine system, LNG-IUS, ATC code G02BA); vaginal ring with progestogen and  
46 estrogen (G02BB); progestogens and estrogens, fixed combinations – including monophasic  
47 combined OCs and transdermal patch (G03AA); progestogens and estrogens, sequential preparations  
48 for systemic use (G03AB); progestogens for systemic use (G03AC); and cyproterone and estrogen  
49 (G03HB01). Psychotropic medications included antipsychotics (N05A), anxiolytics (N05B),  
50 hypnotics/sedatives (N05C), antidepressants (N06A), psychostimulants (N06B), psycholeptics and  
51 psychoanaleptics in combination (N06C).  
52  
53  
54  
55  
56  
57

58 The Population Register Centre contains basic information of all Finnish citizens and foreign citizens  
59 residing permanently in Finland. From this register we obtained information on age, municipality of  
60



1  
2  
3 residence, civil status, socioeconomic group, highest level of education, and annual income of all the  
4 study members on 31 December 2017.

5  
6 The Medical Birth Register includes data on all live births and stillbirths in Finland since 1987; the  
7  
8 Register of Induced Abortions contains data on induced abortions since 1983, and the Register of  
9  
10 Sterilizations on all sterilizations since 1987. Based on these registers, we gathered information on  
11  
12 pregnancies with birth dates in 2016 and 2017, induced abortions performed in 2016 and 2017, and  
13  
14 sterilizations between 1987 and 2016.

15  
16 The Care Register of Health Care, which includes data on inpatient care in hospitals, health centers,  
17  
18 day surgeries and specialized outpatient care, was used to identify women who had received a  
19  
20 psychiatric diagnosis (International Classification of Diseases, 10th Revision codes F10–F19 -  
21  
22 substance abuse-, F30–F39 -mood disorders-, F40–F48 -anxiety disorders-, F50 -eating disorders-  
23  
24 and F60 -personality disorders-) between 2013 and 2016.

### 25 26 **Patient and public involvement**

27  
28 Patients and the public were not directly involved in the research process. Because this is a register-  
29  
30 based study, no informed consent was needed.

### 31 32 **Statistical analyses**

33  
34 The frequency of use of each class of psychotropic medications among HC users and non-users was  
35  
36 compared via chi-squared test. We assessed the percentages of women using each type of HC within  
37  
38 users of categories of psychotropic medications. Women with redeemed prescriptions of two or more  
39  
40 different types of HC in 2017 were classified on the basis of their first redeemed prescription.

41  
42 Associations between use of each class of psychotropic medications and HC use were tested via  
43  
44 univariable (BL-Model 1) and multivariable binary logistic regression models using the “gnm” R-  
45  
46 package,[19] which, through the argument “eliminate”, allows for handling parameters of  
47  
48 stratification factors with a large number of levels (in our case, “municipality of residence”). Separate  
49  
50 models were conducted to test the associations with the use of psychotropic medications in 2017, and  
51  
52 with occasional or regular use from 2013 to 2016. Multivariable models were progressively adjusted  
53  
54 for age group, marital status and education level (BL-Model 2), socioeconomic status and income  
55  
56 level (BL-Model 3), and reproductive characteristics (pregnancies in 2017, induced abortions in  
57  
58 2016–2017, and sterilization before 2017) (BL-Model 4). A separate fully adjusted model further  
59  
60 tested the interaction between age and use of psychotropic medications; if there was a significant  
interaction, age-stratified multivariable analyses were performed.

To further confirm the results and take into account a potential “healthcare user bias”, sensitivity analyses were conducted utilizing the purchased amount in DDD as indicator of use of psychiatric medications between 2013 and 2016. To this end, the total purchased DDD for each class was divided into tertiles, and groups of low, intermediate and high-level users were created accordingly. Because of the data distribution with duplicate values, only two groups were created for high and low level users of hypnotics/sedatives (cut off at the 50<sup>th</sup> percentile), and of psycholeptics and psychoanaleptics in combination (cut off at the 60<sup>th</sup> percentile).

We further examined whether the odds of using distinct types of HC in 2017 differed by occasional or regular use of psychotropic medications between 2013 and 2016. To this end, we conducted univariable (ML-Model 1) and multivariable multinomial logistic regression models among HC users, controlling for age, marital and socioeconomic status, education and income levels (ML-Model 2), and reproductive characteristics (pregnancies or induced abortions in 2016–2017) (ML-Model 3). Because of the relatively small number of women using psychostimulants or psycholeptics and psychoanaleptics in combination, these classes were excluded from these analyses. Sensitivity analyses were additionally performed utilizing groups of users based on the purchased DDD, as described above.

For all the analyses, the two-tailed *p*-values of <0.05 were considered statistically significant. All the analyses were performed with R software version 3.5.1.[20]

## RESULTS

A quarter (25.6%, *n*=294,356) of all fertile-aged women in Finland were using HC in 2017. Their characteristics as well as those of the control women (*n*=294,356) are described in detail elsewhere.[17] The proportions of different utilized HC types are illustrated in Supplementary Figure 1.

### Use of psychotropic medications in 2017

Altogether 110,112 (18.7%) women had redeemed at least one prescription of a psychotropic medication in 2017; of them, 52% (*n*=57,478) used also HC. The proportions of women using and not using HC who also had one or more prescriptions of psychotropic medications by ATC codes are reported in Table 1.

In univariable logistic regression models the use of psychotropic medications in 2017 was associated with higher odds of HC use (ORs: any medication=1.12; anxiolytics=1.10; hypnotics/sedatives=1.17; antidepressants=1.11; psycholeptics and psychoanaleptics in combination=1.30, *p*<0.0001). The associations remained after controlling for age group, education and income levels, marital and

socioeconomic status, and reproductive characteristics. Additionally, in partially and fully adjusted models, the use of antipsychotics was also associated with higher odds of being a HC user (ORs=1.10 to 1.09,  $p<0.0001$ ) (Table 2).

There was a significant interaction between age and a recent prescription of psychotropic medications, except for psycholeptics and psychoanaleptics in combination. Regardless of the type of medication, the proportions of HC users among those with a recent psychotropic prescription were consistently higher especially in teenagers but lower in the young age group (20–24 years) as compared to non-users. Among those with a recent psychiatric prescription, the highest rates of using HC were seen for teenagers (varying from 54.6% for antipsychotics to 55.8% for antidepressants, and 57.5% for anxiolytics and sedatives/hypnotics) (Supplementary Figures 2 and 3).

**Table 1. Proportions of HC users and non-users receiving one or more prescriptions for psychotropic medications in 2017.**

| <b>Class of psychotropic medication<br/>ATC code, class</b>                | <b>HC users</b> | <b>HC non-users</b> | <b><i>p</i>-value</b> |
|----------------------------------------------------------------------------|-----------------|---------------------|-----------------------|
| Any psychotropic medication                                                | 57,478 (19.5%)  | 52,634 (17.9%)      | <0.0001               |
| N05A, antipsychotics                                                       | 11,136 (3.8%)   | 11,688 (4.0%)       | 0.0002                |
| N05B, anxiolytics                                                          | 17,181 (5.8%)   | 15,744 (5.4%)       | <0.0001               |
| N05C, hypnotics/sedatives                                                  | 17,829 (6.1%)   | 15,397 (5.2%)       | <0.0001               |
| N06A, antidepressants                                                      | 40,488 (13.8%)  | 37,028 (12.6%)      | <0.0001               |
| N06B, psychostimulants                                                     | 1,681 (0.57%)   | 1,715 (0.58%)       | 0.570                 |
| N06C, psycholeptics and psychoanaleptics<br>(amitriptyline) in combination | 1,237 (0.4%)    | 952 (0.3%)          | <0.0001               |

ATC, Anatomical Therapeutic Chemical; HC, hormonal contraception

**Table 2. Associations between prescriptions of psychotropic medications in 2017 and HC use in 2017.**

| Psychotropic medication.<br>ATC code, class | Model 1 |              |                 | Model 2 |              |                 | Model 3 |              |                 | Model 4 |              |                 |
|---------------------------------------------|---------|--------------|-----------------|---------|--------------|-----------------|---------|--------------|-----------------|---------|--------------|-----------------|
|                                             | OR      | 95% CI       | <i>p</i> -value |
| Any psychotropic medication                 | 1.12    | 1.10 to 1.13 | <0.0001         | 1.15    | 1.13 to 1.16 | <0.0001         | 1.16    | 1.14 to 1.17 | <0.0001         | 1.15    | 1.13 to 1.17 | <0.0001         |
| N05A, antipsychotics                        | 0.95    | 0.93 to 0.98 | 0.00019         | 1.02    | 0.99 to 1.05 | 0.212           | 1.10    | 1.07 to 1.13 | <0.0001         | 1.09    | 1.06 to 1.12 | <0.0001         |
| N05B, anxiolytics                           | 1.10    | 1.07 to 1.12 | <0.0001         | 1.14    | 1.12 to 1.17 | <0.0001         | 1.16    | 1.14 to 1.19 | <0.0001         | 1.16    | 1.14 to 1.19 | <0.0001         |
| N05C, hypnotics/<br>sedatives               | 1.17    | 1.14 to 1.20 | <0.0001         | 1.19    | 1.16 to 1.21 | <0.0001         | 1.18    | 1.15 to 1.20 | <0.0001         | 1.17    | 1.14 to 1.20 | <0.0001         |
| N06A, antidepressants                       | 1.11    | 1.09 to 1.13 | <0.0001         | 1.14    | 1.12 to 1.15 | <0.0001         | 1.16    | 1.14 to 1.17 | <0.0001         | 1.15    | 1.13 to 1.16 | <0.0001         |
| N06B, psychostimulants                      | 0.98    | 0.92 to 1.05 | 0.56            | 1.05    | 0.98 to 1.13 | 0.142           | 1.08    | 1.00 to 1.15 | 0.039           | 1.07    | 1.00 to 1.15 | 0.057           |
| N06C, psycholeptics and<br>psychoanaleptics | 1.30    | 1.20 to 1.42 | <0.0001         | 1.31    | 1.20 to 1.42 | <0.0001         | 1.27    | 1.17 to 1.39 | <0.0001         | 1.26    | 1.16 to 1.38 | <0.0001         |

Model 1 is the unadjusted model; Model 2 is Model 1 adjusted for age group, education and marital status; Model 3 is Model 2 adjusted for socioeconomic status and income level; Model 4 is Model 3 adjusted for recent pregnancy (in 2017), abortion (in 2016-2017) and sterilization (before 2017).

### Use of psychotropic medications between 2013 and 2016

A total of 112,609 women of our study population redeemed at least one prescription of a psychotropic medication between 2013 and 2016; of them, 20.8% (n=23,379) received a psychiatric diagnosis in the same period according to the records in the Care Register of Health Care; conversely, 18.5% (n=5,302) of the 28,681 women with a psychiatric diagnosis between 2013 and 2016 had not redeemed any psychiatric prescriptions.

Approximately 15% of the women (n=86,644) were regular users of psychotropic medications in the period 2013–2016, while 4.4% (n=25,965) received only one psychiatric prescription (Table 3, left side).

Higher odds for using HC were predicted by (occasional and regular) use of hypnotics/sedatives and psycholeptics and psychoanaleptics, and by regular use of antidepressants during 2013–2016 in unadjusted logistic regression models. On the contrary, occasional and regular use of antipsychotics and regular use of anxiolytics were associated with lower odds of HC use (Table 4). After adjustment for covariates occasional use of hypnotics/sedatives and psycholeptics and psychoanaleptics, and regular use of almost all the classes of psychiatric medications predicted belonging to the HC user group, although with small to very small effect sizes (ORs ranging between 1.06 and 1.37).

Sensitivity analyses using quantiles of redeemed DDD as indicator of psychotropic drug use (Table 3, right side) substantially confirmed these findings. Specifically, women with higher use (i.e., belonging to the highest levels of redeemed DDD) of all psychotropic medications had higher odds of using HC compared to women with no redeemed medications (i.e., with a DDD of zero for the respective drug class). Lower use of psychotropic medications was generally not associated with HC use (Supplementary Table 1).

There was a significant age\*psychotropic medication interaction in predicting HC use for all the medication classes ( $p \leq 0.0001$ ), with the exception of psycholeptics and psychoanaleptics. In detail, among occasional and regular users of psychotropic medications, the odds of HC use tended to be lower (than in non-users of psychotropic medications) in teenagers and young women (20–29 years), but higher in middle-age women (Supplementary Figures 4 and 5).

**Table 3. Proportions of HC users and non-users receiving one or more prescriptions of psychotropic medications between 2013 and 2016, as number of prescriptions (left side) or levels of use (based on quantiles of redeemed DDD) (right side).**

| Class of psychotropic medication                 | Number of prescriptions | Number of prescriptions |                |                 | Level of use* | Level of use*  |                |                 |
|--------------------------------------------------|-------------------------|-------------------------|----------------|-----------------|---------------|----------------|----------------|-----------------|
|                                                  |                         | HC users                | HC non-users   | <i>p</i> -value |               | HC users       | HC non-users   | <i>p</i> -value |
| Any psychotropic medication                      | one prescription        | 13,269 (4.5%)           | 12,696 (4.3%)  | 0.0001          | ---           | ---            | ---            | ---             |
|                                                  | ≥ 2 prescriptions       | 43,572 (14.8%)          | 43,072 (14.6%) |                 | ---           | ---            | ---            | ---             |
| Antipsychotics                                   | one prescription        | 3,867 (1.5%)            | 4,273 (1.3%)   | <0.0001         | Low           | 5,445 (1.85%)  | 5,709 (1.94%)  | <0.0001         |
|                                                  | ≥ 2 prescriptions       | 10,548 (3.6%)           | 11,694 (4.0%)  |                 | Intermediate  | 4,385 (1.49%)  | 4,734 (1.61%)  |                 |
|                                                  |                         |                         |                |                 | High          | 4,582 (1.56%)  | 5,519 (1.88%)  |                 |
| Anxiolytics                                      | one prescription        | 6,748 (2.3%)            | 6,564 (2.2%)   | 0.011           | Low           | 4,852 (1.65%)  | 4,650 (1.58%)  | 0.0013          |
|                                                  | ≥ 2 prescriptions       | 6,705 (2.3%)            | 7,001 (2.4%)   |                 | Intermediate  | 4,503 (1.53%)  | 4,506 (1.53%)  |                 |
|                                                  |                         |                         |                |                 | High          | 4,098 (1.39%)  | 4,409 (1.50%)  |                 |
| Hypnotics/<br>sedatives                          | one prescription        | 6,786 (2.3%)            | 6,072 (2.1%)   | <0.0001         | Low           | 6,865 (2.33%)  | 6,134 (2.08%)  | <0.0001         |
|                                                  | ≥ 2 prescriptions       | 6,321 (2.2%)            | 5,493 (1.9%)   |                 | High          | 6,232 (2.12%)  | 5,407 (1.84%)  |                 |
| Antidepressants                                  | one prescription        | 8,395 (2.9%)            | 8,460 (2.9%)   | 0.053           | Low           | 14,815 (2.52%) | 14,867 (2.53%) | 0.088           |
|                                                  | ≥ 2 prescriptions       | 36,396 (12.4%)          | 35,793 (12.2%) |                 | Intermediate  | 14,998 (2.55%) | 14,689 (2.50%) |                 |
|                                                  |                         |                         |                |                 | High          | 14,978 (2.54%) | 14,697 (2.50%) |                 |
| Psychostimulants                                 | one prescription        | 236 (0.08%)             | 276 (0.09%)    | 0.11            | Low           | 617 (0.21%)    | 702 (0.24%)    | 0.052           |
|                                                  | ≥ 2 prescriptions       | 1,604 (0.6%)            | 1,669 (0.6%)   |                 | Intermediate  | 563 (0.19%)    | 612 (0.21%)    |                 |
|                                                  |                         |                         |                |                 | High          | 617 (0.21%)    | 602 (0.21%)    |                 |
| Psycholeptics-psychoanaleptics<br>in combination | one prescription        | 809 (0.28%)             | 673 (0.23%)    | <0.0001         | Low           | 804 (0.27%)    | 658 (0.22%)    | <0.0001         |
|                                                  | ≥ 2 prescriptions       | 697 (0.24%)             | 538 (0.18%)    |                 | High          | 702 (0.24%)    | 553 (0.19%)    |                 |

ATC, Anatomical Therapeutic Chemical; DDD, defined daily dose; HC, hormonal contraception.

\* Level of use of psychotropic medications was based on quantiles of purchased DDD (tertiles for antipsychotics, anxiolytics, antidepressants and psychostimulants; 50<sup>th</sup> percentile for hypnotics/sedatives, and 60<sup>th</sup> percentile for psycholeptics and psychoanaleptics in combination).

**Table 4. Associations between number of prescriptions of psychotropic medications between 2013 and 2016, and HC use in 2017**

| Class of psychotropic medication      | Number of prescriptions | Model 1 |              |                 | Model 2 |              |                 | Model 3 |              |                 | Model 4 |              |                 |
|---------------------------------------|-------------------------|---------|--------------|-----------------|---------|--------------|-----------------|---------|--------------|-----------------|---------|--------------|-----------------|
|                                       |                         | OR      | 95% CI       | <i>p</i> -value |
| Antipsychotics                        | one prescription        | 0.90    | 0.86 to 0.94 | <0.0001         | 0.95    | 0.91-1.00    | 0.0335          | 0.96    | 0.92 to 1.01 | 0.104           | 0.96    | 0.92 to 1.00 | 0.069           |
|                                       | ≥ 2 prescriptions       | 0.90    | 0.88 to 0.92 | <0.0001         | 0.97    | 0.94 to 1.00 | 0.0198          | 1.06    | 1.03 to 1.09 | 0.0001          | 1.06    | 1.03 to 1.09 | 0.0002          |
| Anxiolytics                           | one prescription        | 1.03    | 0.99 to 1.06 | 0.121           | 1.04    | 1.00 to 1.08 | 0.0295          | 1.04    | 1.01 to 1.08 | 0.0214          | 1.04    | 1.00 to 1.07 | 0.055           |
|                                       | ≥ 2 prescriptions       | 0.96    | 0.93 to 0.99 | 0.0117          | 1.02    | 0.98 to 1.05 | 0.309           | 1.10    | 1.06 to 1.14 | <0.0001         | 1.10    | 1.06 to 1.14 | <0.0001         |
| Hypnotics/<br>sedatives               | one prescription        | 1.12    | 1.09 to 1.16 | <0.0001         | 1.12    | 1.08 to 1.16 | <0.0001         | 1.09    | 1.05 to 1.13 | <0.0001         | 1.09    | 1.05 to 1.13 | <0.0001         |
|                                       | ≥ 2 prescriptions       | 1.16    | 1.12 to 1.20 | <0.0001         | 1.16    | 1.11 to 1.20 | <0.0001         | 1.18    | 1.14 to 1.23 | <0.0001         | 1.19    | 1.15 to 1.24 | <0.0001         |
| Antidepressants                       | one prescription        | 1.00    | 0.96 to 1.03 | 0.724           | 1.02    | 0.99 to 1.06 | 0.165           | 1.01    | 0.98 to 1.04 | 0.479           | 1.01    | 0.98 to 1.04 | 0.575           |
|                                       | ≥ 2 prescriptions       | 1.02    | 1.00 to 1.04 | 0.0178          | 1.04    | 1.03 to 1.06 | <0.0001         | 1.07    | 1.06 to 1.09 | <0.0001         | 1.07    | 1.06 to 1.09 | <0.0001         |
| Psychostimulants                      | one prescription        | 0.86    | 0.72 to 1.02 | 0.077           | 0.92    | 0.77 to 1.09 | 0.323           | 0.95    | 0.79 to 1.13 | 0.535           | 0.94    | 0.79 to 1.13 | 0.510           |
|                                       | ≥ 2 prescriptions       | 0.96    | 0.90 to 1.03 | 0.252           | 1.03    | 0.96 to 1.10 | 0.405           | 1.05    | 0.98 to 1.12 | 0.213           | 1.04    | 0.97 to 1.12 | 0.247           |
| Psycholeptics and<br>psychoanaleptics | one prescription        | 1.20    | 1.09 to 1.33 | 0.0004          | 1.19    | 1.07 to 1.32 | 0.0012          | 1.17    | 1.06 to 1.30 | 0.0025          | 1.18    | 1.06 to 1.31 | 0.0024          |
|                                       | ≥ 2 prescriptions       | 1.30    | 1.16 to 1.45 | <0.0001         | 1.31    | 1.17 to 1.47 | <0.0001         | 1.35    | 1.21 to 1.52 | <0.0001         | 1.37    | 1.22 to 1.53 | <0.0001         |

Model 1 is the unadjusted model; Model 2 is Model 1 adjusted for age group, education and marital status; Model 3 is Model 2 adjusted for socioeconomic status and income level; Model 4 is Model 3 adjusted for recent pregnancy (in 2017), abortion (in 2016-2017) and sterilization (before 2017). HC, hormonal contraception.

### Psychotropic medications and HC types

Supplementary Figure 6 illustrates the types of HC used in 2017 by occasional and regular users of psychotropic medications between 2013 and 2016.

In univariable and multivariable (adjusted for age group, marital and socioeconomic status, education and income level, recent pregnancy or induced abortion) multinomial logistic regression models, when fixed combinations of progestogens and estrogens for systemic use (ATC: G03AA) was the reference category, women either occasionally (Figure 1) or regularly (Figure 2) using almost any class of psychotropic medications had higher odds of using any other types of HC (such as the LNG-IUS and, to a lesser extent, vaginal ring and progestogens for systemic use). The results were substantially confirmed in unadjusted and, to a lesser extent, adjusted models using quantiles of redeemed DDD (Supplementary Table 2).

### DISCUSSION

According to our results, the current as well as past uses of psychotropic medications are associated with higher odds of using HC among Finnish women of fertile age. This association holds also in relation to regular and, although to a lesser extent, occasional use of psychiatric medications during the four previous years. This study additionally indicates that mental disorders, as identified by redeemed prescriptions of psychotropic medications, are associated with the type of contraceptive chosen.

Our study has a number of limitations. First, misclassification of both psychiatric disorders and HC use cannot be ruled out. Because our indicator of psychiatric disorders was a prescription of psychotropic medications, women with mild conditions, who do not need a pharmacological treatment, as well as women with more severe disorders but not yet receiving (or with poor adherence to) a pharmacological treatment, may have been included in the reference group. However, by distinguishing regular vs. occasional past psychiatric prescriptions, and by conducting sensitivity analyses utilizing the amount of purchased drug, we partly took into account these factors. Similarly, because we had no information on contraception use before 2017, it is possible that a number of women in the control group were in fact using HC, especially LARC methods, which may have been prescribed or inserted before 2017. The lack of information on HC use before 2017 further limits the interpretability of the detected prospective associations, which can in fact reflect a more complex path between (unidentified) HC use between 2013–2016, psychiatric problems in the same period, and HC use in 2017. It is also possible that the detected associations in fact result from a selection bias, where unobserved confounding may underlie the choice of using HC, especially in young women.



1  
2  
3 Additionally, we lacked information on the use of contraceptives that do not require a prescription,  
4 such as copper IUD or condoms, or on young women who obtained free contraception as part of  
5 municipal programs. We may expect that a proportion of women with psychiatric disorders, being  
6 usually high utilizers of healthcare services, may have received free-of-charge (and thus without a  
7 prescription) contraception, and thus being erroneously classified as non-users. However, if this were  
8 the case, it would even further support our results. Likewise, because more than 20% of women who  
9 receive free contraception opt for a LARC method such as the LNG-IUS or contraceptive  
10 implants,[33] the same bias may concern the analyses on the HC types.

11 Among the strengths of the study, our population was highly representative, including more than half  
12 of fertile-aged women in Finland. Additional strengths are the use of register data with proven good  
13 validity and reliability, and the combination of a cross-sectional and longitudinal retrospective design,  
14 which provides stability to our predictor of interest. Our findings are further supported by the use of  
15 different approaches to determine levels of use of psychotropic medications.

16  
17 To the best of our knowledge, this is the first study to examine, on a nationwide scale, the associations  
18 between the concurrent and past class-specific use of psychotropic medications and class-specific HC  
19 use. The observation of higher odds for HC use among women using psychotropic medications  
20 contrasts with large part of the available evidence.[1] <sup>1</sup> In fact, previous studies reported associations  
21 between psychiatric disorders and risky sexual behavior, lower contraceptive compliance,  
22 contraceptive non-use, unintended pregnancy, and use of less effective methods.[9,11,12,21-28]  
23 However, other works showed either no relationships between depressive/anxiety symptoms or  
24 psychological distress and inconsistent use of contraception or use of less effective methods, or even  
25 higher odds of choosing a more effective method.[29-32]

26  
27 Although not totally comparable, our findings, supported by the use of both a cross-sectional and a  
28 longitudinal design, suggest that women with psychiatric disorders, as indicated by repeated  
29 prescriptions of psychotropic medications, have good access to, and are well aware of contraceptive  
30 options in Finland. The use of contraception was especially higher among teenagers who used  
31 psychiatric medications than in their peers who were not using the same drugs. However, it tended to  
32 invert the figure for the young age group (20–24 years), possibly suggesting that the adequate  
33 psychiatric and reproductive counselling and education likely offered through the school system may  
34 not be completely continued after high school.

35  
36 The observation of a relationship between the use of psychotropic drugs and the type of contraceptive  
37 chosen provides additional information on the reproductive health status of these women.  
38 Specifically, the use of psychiatric medications was associated with higher odds of using types of  
39  
40  
41  
42  
43  
44  
45  
46  
47  
48  
49  
50  
51  
52  
53  
54  
55  
56  
57  
58  
59  
60

1  
2  
3 contraception other than the monophasic OCs, and especially long-acting reversible contraception  
4 (LARC) methods such as the LNG-IUS, as well as vaginal ring and progestogens for systemic use  
5 including implants. Because the oral preparations in particular require daily motivation, the use of  
6 less user-dependent LARC methods may be advisable especially in women who, because of their  
7 psychological challenges, may have difficulty with a method necessitating daily remembering.  
8  
9

10  
11  
12  
13 It could be argued that our findings may be affected by a healthcare user bias. In other words, it is  
14 likely that women suffering from and seeking help for their psychiatric disorders, and thus receiving  
15 a pharmacological treatment, represent a more conscious and healthy subgroup of this population. As  
16 such, they may obtain a better control of their symptoms (as compared to their peers not using  
17 psychiatric medications), and thus also of other areas of their lives, including contraception.  
18 Moreover, because more likely to visit healthcare services, they may also be more likely to receive  
19 and adhere to any medical prescription. Reciprocally, women who use HC are likely to see healthcare  
20 providers, and thus to have their psychiatric symptoms diagnosed and pharmacologically treated. This  
21 assumption is supported by the observation that the detected associations were substantially  
22 consistent for women with either repeated prescriptions or belonging to the highest DDD group, but  
23 almost completely non-existent for occasional users or those with the lowest purchased DDD.  
24 However, in our sensitivity analyses part of the associations hold also in the group of women with  
25 intermediate/low use (e.g., in the case of hypnotic/sedatives, antidepressants, psycholeptics and  
26 psychoanaleptics) possibly including, in addition to occasional users, those with poor compliance to  
27 psychopharmacological treatment.  
28  
29  
30  
31  
32  
33  
34  
35  
36  
37  
38  
39

40  
41 In summary, fertile-aged women with psychiatric disorders, as identified by prescriptions of  
42 psychiatric medications, have higher odds of using HC in Finland, with a specific pattern in the type  
43 of contraceptives used. Whether our observation of adequate use of effective contraception among  
44 women with psychiatric disorders translates into an actual reduction in the number of unwanted  
45 pregnancies, and thus of induced abortions, in this population, it remains to be examined.  
46  
47  
48  
49  
50

## 51 52 53 **CONTRIBUTORSHIP STATEMENT**

54 ET, AB, OH, AL, TP and JH contributed to the study planning and design, interpretation of the data,  
55 and critical revision of the manuscript. ET and JH verified the data. ET and JH had full access to all  
56 the data and performed statistical analyses. ET wrote the first draft of the manuscript. ET, AB, OH,  
57  
58  
59  
60

1  
2  
3 AL, TP and JH approved the submitted version of the manuscript and accepted responsibility to  
4 submit for publication. ET and JH are the guarantors.  
5  
6  
7

## 8 **FUNDING**

9  
10 This work was supported by the Jane and Aatos Erkko Foundation (JH; grant number 170062), the  
11 Avohoidon tutkimussäätiö (JH; Foundation for Primary Care Research) and the the Yrjö Jahnsen  
12 Foundation (ET; grant number 20207328).  
13  
14  
15  
16

## 17 **COMPETING INTERESTS**

18 OH reports a research grant from the Jane and Aatos Erkko Foundation during the conduct of the  
19 study; personal fees from Bayer Health Care AG, personal fees from Gedeon-Richter outside the  
20 submitted work; OH serves as president for the Finnish Gynecological Society and for the Nordic  
21 Federation of the Societies of Obstetrics and Gynecology, and is the chairperson for the Finnish  
22 national guideline committee on induced abortion care. The other authors report no conflicts of  
23 interest.  
24  
25  
26  
27  
28

## 29 **PATIENT CONSENT FOR PUBLICATION**

30  
31 Not required.  
32  
33  
34  
35

## 36 **ETHICS APPROVAL STATEMENT**

37 The study was approved by the Ethics Committee of the Faculty of Medicine, University of Helsinki  
38 (3/2018).  
39  
40  
41  
42

## 43 **DATA SHARING**

44 The data that support the findings of this study are available from Statistics Finland, the Finnish  
45 Institute for Health and Welfare, and the Social Insurance Institution, but restrictions apply to the  
46 availability of these data, which were used under license for the current study, and so are not publicly  
47 available. Data are, however, available from the authors upon reasonable request and with permission  
48 of FinData (<https://www.findata.fi/en/>).  
49  
50  
51  
52  
53  
54  
55

## 56 **References**

57  
58 1. McCloskey LR, Wisner KL, Cattan MK, et al. Contraception for women with psychiatric disorders.  
59 *Am J Psychiatry* 2021;178:247–55. doi:10.1176/appi.ajp.2020.20020154.  
60

2. Duke JM, Sibbritt DW, Young AF. Is there an association between the use of oral contraception and depressive symptoms in young Australian women? *Contraception* 2007;75:27–31. doi:10.1016/j.contraception.2006.08.002.
3. Cheslack-Postava K, Keyes KM, Lowe SR, et al. Oral contraceptive use and psychiatric disorders in a nationally representative sample of women. *Arch Womens Ment Health* 2015;18:103–11. doi:10.1007/s00737-014-0453-4.
4. Skovlund CW, Mørch LS, Kessing LV, et al. Association of hormonal contraception with depression. *JAMA Psychiatry* 2016;73:1154–62. doi:10.1001/jamapsychiatry.2016.2387.
5. Skovlund CW, Mørch LS, Kessing LV, et al. Association of hormonal contraception with suicide attempts and suicides. *Am J Psychiatry* 2018;175:336–42. doi:10.1176/appi.ajp.2017.17060616.
6. Edwards A, Lönn S, Crump C, et al. Oral contraceptive use and risk of suicidal behavior among young women. *Psychol Med* 2020;1–8. doi:10.1017/S0033291720003475.
7. Anderl C, Li G, Chen FS. Oral contraceptive use in adolescence predicts lasting vulnerability to depression in adulthood. *J Child Psychol Psychiatr* 2020;61:148–56. doi:10.1111/jcpp.13115.
8. Ramrakha S, Caspi A, Dickson N, et al. Psychiatric disorders and risky sexual behaviour in young adulthood: cross sectional study in birth cohort *BMJ* 2000;321:263. doi:10.1136/bmj.321.7256.263.
9. Zink TM, Shireman TI, Ho M, et al. High-risk teen compliance with prescription contraception: an analysis of Ohio Medicaid claims. *J Pediatr Adolesc Gynecol* 2002;15:15–21. doi:10.1016/S1083-3188(01)00134-6.
10. Walsemann KM, Perez AD. Anxiety's relationship to inconsistent use of oral contraceptives. *Health Educ Behav* 2006;33:197–214. doi:10.1177/1090198105277322.
11. Garbers S, Correa N, Tobier N, et al. Association between symptoms of depression and contraceptive method choices among low-income women at urban reproductive health centers. *Matern Child Health J* 2010;14:102. doi:10.1007/s10995-008-0437-y.
12. Vafai Y, Steinberg JR. The effects of preabortion depressive symptoms on postabortion contraceptive effectiveness level chosen among women seeking abortions. *Contraception* 2018;97:335–40. doi:10.1016/j.contraception.2017.12.013.
13. Hall KS, O'Connell WK, Rickert VI, et al. Influence of depressed mood and psychological stress symptoms on perceived oral contraceptive side effects and discontinuation in young minority women. *Contraception* 2012;86:518–25. doi:10.1016/j.contraception.2012.04.010.
14. Hall KS, Moreau C, Trussell J, et al. Young women's consistency of contraceptive use — does depression or stress matter? *Contraception* 2013;88:641–9. doi:10.1016/j.contraception.2013.06.003.
15. Pope CJ, Oinonen K, Mazmanian D, et al. The hormonal sensitivity hypothesis: A review and new findings. *Med Hypotheses* 2017;102:69–77. doi:10.1016/j.mehy.2017.03.012.

- 1  
2  
3 16. Bengtsdotter H, Lundin C, Gemzell Danielsson K, et al. Ongoing or previous mental disorders  
4 predispose to adverse mood reporting during combined oral contraceptive use. *Eur J Contracept*  
5 *Reprod Health Care* 2018;23:45–51. doi:10.1080/13625187.2017.1422239.  
6  
7  
8 17. Toffol E, But A, Heikinheimo O, et al. Associations between hormonal contraception use,  
9 sociodemographic factors and mental health: a nationwide, register-based, matched case–control  
10 study. *BMJ Open* 2020;10:e040072. doi:10.1136/bmjopen-2020-040072.  
11  
12 18. Kanta Services. What are the Kanta services? Available: [https://www.kanta.fi/en/what-are-kanta-](https://www.kanta.fi/en/what-are-kanta-services)  
13 [services](https://www.kanta.fi/en/what-are-kanta-services) [Accessed 24 Mar 2021].  
14  
15 19. Turner H, Firth D. Generalized nonlinear models in R: an overview of the gnm package. R  
16 package version 1.1-1, 2020. Available: <https://CRAN.R-project.org/package=gnm> [Accessed 24  
17 Mar 2021].  
18  
19 20. R Core Team. R: A Language and Environment for Statistical Computing [Internet]. Vienna,  
20 Austria: R Foundation for Statistical Computing, 2019. Available from: <https://www.R-project.org/>  
21  
22 21. Tubman JG, Gil AG, Wagner EF, et al. Patterns of sexual risk behaviors and psychiatric disorders  
23 in a community sample of young adults. *J Behav Med* 2003;26:473–500.  
24 doi:10.1023/A:1025776102574.  
25  
26 22. Brown A, Yung A, Cosgrave E, et al. Depressed mood as a risk factor for unprotected sex in  
27 young people. *Australas Psychiatry* 2006;14:310–2. doi:10.1080/j.1440-1665.2006.02291.x.  
28  
29 23. DiClemente RJ, Wingood GM, Crosby RA, et al. A prospective study of psychological distress  
30 and sexual risk behavior among black adolescent females. *Pediatrics* 2001;108:e85.  
31 doi:10.1542/peds.108.5.e85.  
32  
33 24. Lehrer JA, Shrier LA, Gortmaker S, et al. Depressive symptoms as a longitudinal predictor of  
34 sexual risk behaviors among US middle and high school students. *Pediatrics* 2006;118:189–200.  
35 doi:10.1542/peds.2005-1320.  
36  
37 25. Hall KS, Moreau C, Trussell J, et al. Role of young women's depression and stress symptoms in  
38 their weekly use and nonuse of contraceptive methods. *J Adolesc Health* 2013;53:241–8.  
39 doi:10.1016/j.jadohealth.2013.02.009.  
40  
41 26. Hall KS, Kusunoki Y, Gatny H, et al. The risk of unintended pregnancy among young women  
42 with mental health symptoms. *Soc Sci Med* 2014;100:62–71. doi:10.1016/j.socscimed.2013.10.037.  
43  
44 27. Berenson AB, Breitkopf CR, Wu ZH. Reproductive correlates of depressive symptoms among  
45 low-income minority women. *Obstet Gynecol* 2003;102:1310–7.  
46 doi:10.1016/j.obstetgynecol.2003.08.012.  
47  
48 28. Bello JK, Salas J, Meyer D, et al. Mental health diagnoses and early removal of long-acting  
49 reversible contraception. *J Affect Disord* 2020;262:333–6. doi:10.1016/j.jad.2019.11.046.  
50  
51  
52  
53  
54  
55  
56  
57  
58  
59  
60

- 1  
2  
3 29. Steinberg JR, Tschann JM, Henderson JT, et al. Psychological distress and post-abortion  
4 contraceptive method effectiveness level chosen at an urban clinic. *Contraception* 2013;88:717–24.  
5 doi:10.1016/j.contraception.2013.08.009.  
6  
7  
8 30. Francis J, Presser L, Malbon K, et al. An exploratory analysis of contraceptive method choice and  
9 symptoms of depression in adolescent females initiating prescription contraception. *Contraception*  
10 2015;91:336–43. doi:10.1016/j.contraception.2014.12.010.  
11  
12 31. Faisal-Cury A, Rossi Menezes P, Huang H. The relationship between perinatal psychiatric  
13 disorders and contraception use among postpartum women. *Contraception* 2013;88:498–502.  
14 doi:10.1016/j.contraception.2013.02.003.  
15  
16 32. Nelson DB, Zhao H, Corrado R, et al. Preventing unintended pregnancy among young sexually  
17 active women: recognizing the role of violence, self-esteem, and depressive symptoms on use of  
18 contraception. *J Womens Health* 2017;26:352–60. doi:10.1089/jwh.2016.5753.  
19  
20 33. Gyllenberg F, Saloranta T, But A, et al. Predictors of choosing long-acting reversible  
21 contraceptive methods when provided free-of-charge - A prospective cohort study in Finland.  
22 *Contraception* 2020;101:370–5. doi:10.1016/j.contraception.2020.01.018.  
23  
24  
25  
26  
27  
28  
29  
30  
31  
32  
33  
34  
35  
36  
37  
38  
39  
40  
41  
42  
43  
44  
45  
46  
47  
48  
49  
50  
51  
52  
53  
54  
55  
56  
57  
58  
59  
60

**Figure 1. Associations between occasional use of psychotropic medications (one prescription) between 2013 and 2016, and type of hormonal contraceptives used in 2017.** Panel A: antipsychotics; Panel B: anxiolytics; Panel C: hypnotics/sedatives; Panel D: antidepressants. Results are from multinomial logistic regression models among HC users. Model 1 is the unadjusted model; Model 2 is Model 1 adjusted for age, marital and socioeconomic status, education and income level; Model 3 is Model 2 adjusted for abortion and pregnancy in 2016-2017. Reference category: G03AA, progestogens and estrogens, fixed combinations for systemic use –including monophasic combined oral contraceptives and transdermal patch. G02BA: intrauterine device with progestogen; G02BB: vaginal ring with progestogen and estrogen; G03AB: progestogens and estrogens, sequential preparations for systemic use; G03AC: progestogens for systemic use; G03HB01: cyproterone and estrogen.

**Figure 2. Associations between regular use of psychotropic medications (two or more prescriptions) between 2013 and 2016, and type of hormonal contraceptives used in 2017.** Panel A: antipsychotics; Panel B: anxiolytics; Panel C: hypnotics/sedatives; Panel D: antidepressants. Results are from multinomial logistic regression models among HC users. Model 1 is the unadjusted model; Model 2 is Model 1 adjusted for age, marital and socioeconomic status, education and income level; Model 3 is Model 2 adjusted for abortion and pregnancy in 2016-2017. Reference category: G03AA, progestogens and estrogens, fixed combinations for systemic use –including monophasic combined oral contraceptives and transdermal patch. G02BA: intrauterine device with progestogen; G02BB: vaginal ring with progestogen and estrogen; G03AB: progestogens and estrogens, sequential preparations for systemic use; G03AC: progestogens for systemic use; G03HB01: cyproterone and estrogen.

**Supplementary Figure 1. Proportions of different types of HC used in Finland in 2017.**

**Supplementary Figure 2. Associations between one or more prescriptions of psychotropic medications and use of hormonal contraception in 2017, stratified by age group.**

**Supplementary Figure 3. Proportions of HC use among women using and not using different classes of psychotropic medications in 2017, by age group.**

**Supplementary Figure 4. Associations between occasional (one prescription) or regular (two or more prescriptions) use of psychotropic medications between 2013 and 2016, and hormonal contraception use in 2017, stratified by age group.**

**Supplementary Figure 5. Proportions of HC use in 2017 among women with no, occasional (one prescription) and regular (two or more prescriptions) use of psychotropic medications between 2013 and 2016.**

1  
2  
3 **Supplementary Figure 6. Proportions of types of hormonal contraceptives used in 2017 by**  
4 **women with occasional (one prescription) and regular (two or more prescriptions) use of**  
5 **psychotropic medications between 2013 and 2016.**  
6  
7  
8  
9  
10  
11  
12  
13  
14  
15  
16  
17  
18  
19  
20  
21  
22  
23  
24  
25  
26  
27  
28  
29  
30  
31  
32  
33  
34  
35  
36  
37  
38  
39  
40  
41  
42  
43  
44  
45  
46  
47  
48  
49  
50  
51  
52  
53  
54  
55  
56  
57  
58  
59  
60

For peer review only



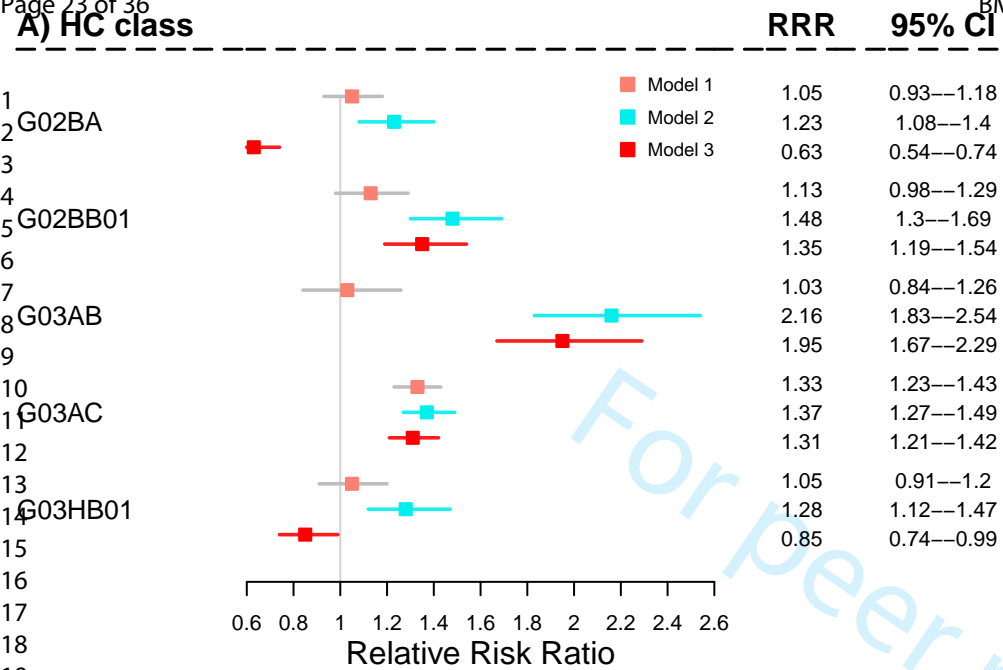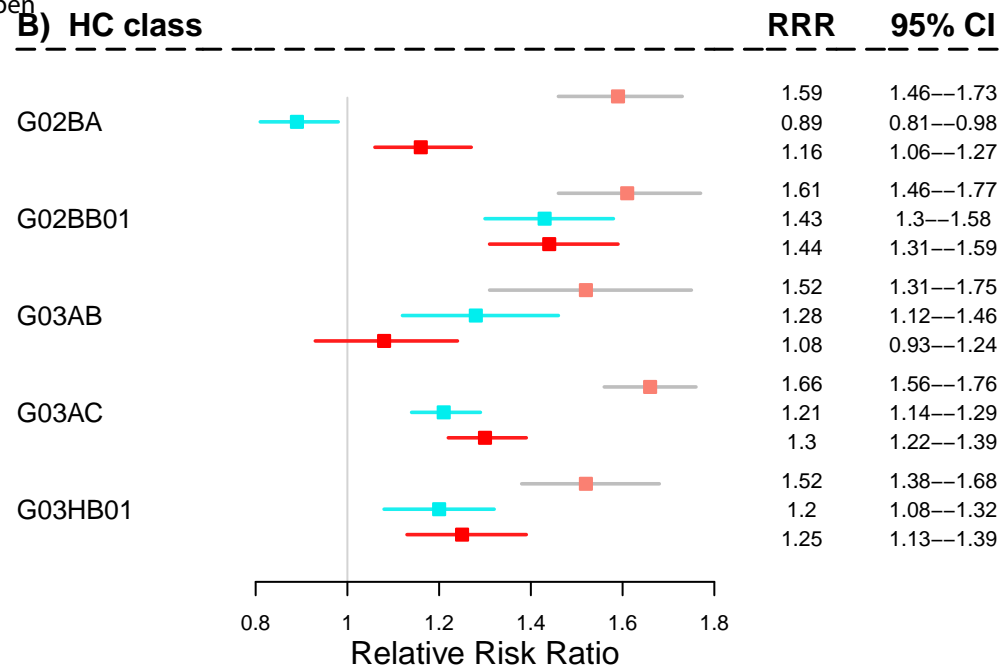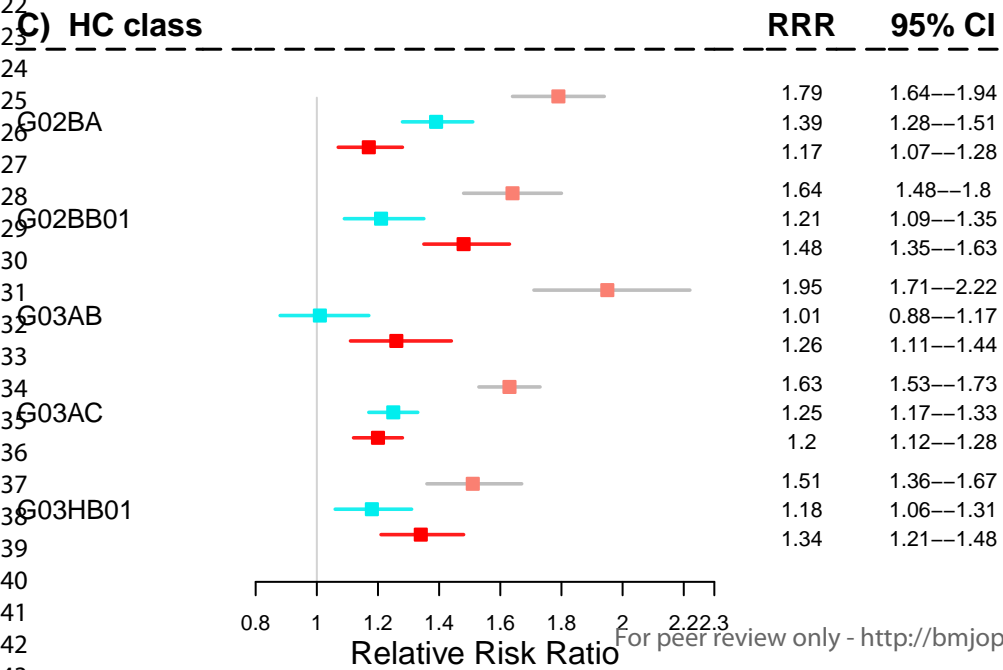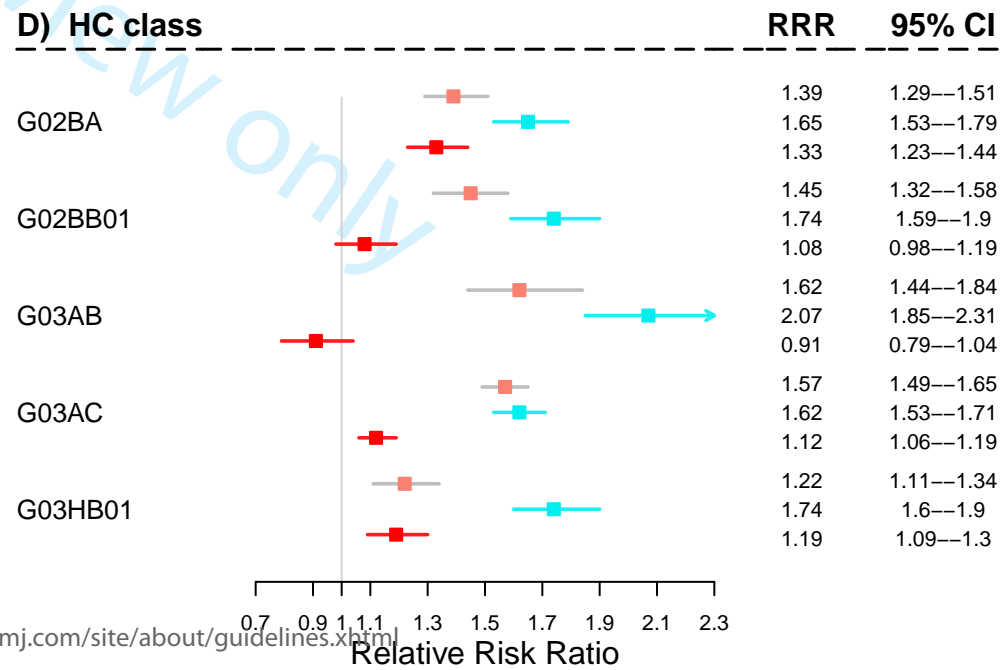

For peer review only

A) HC class

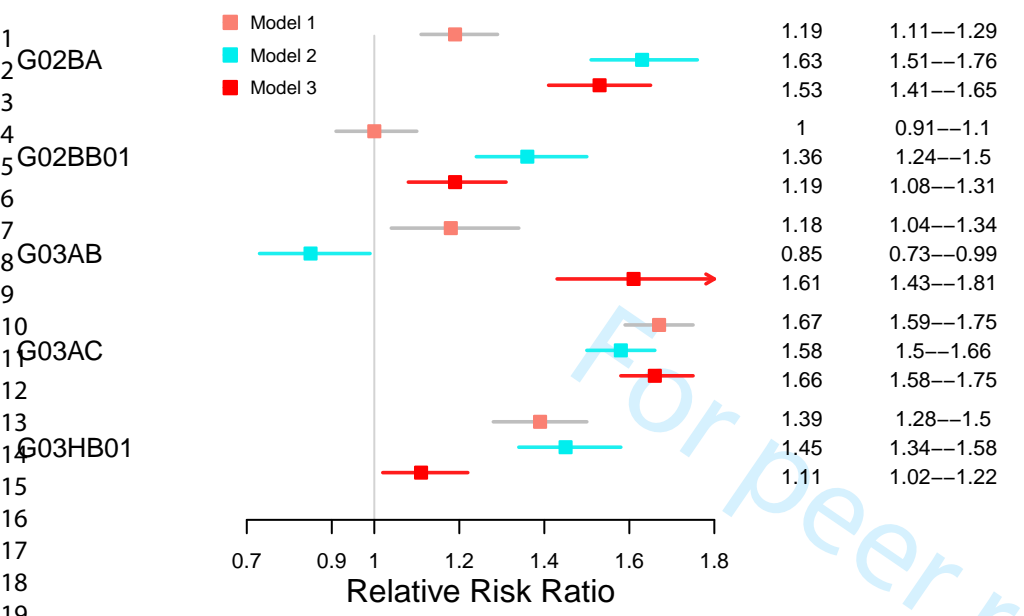

B) HC class

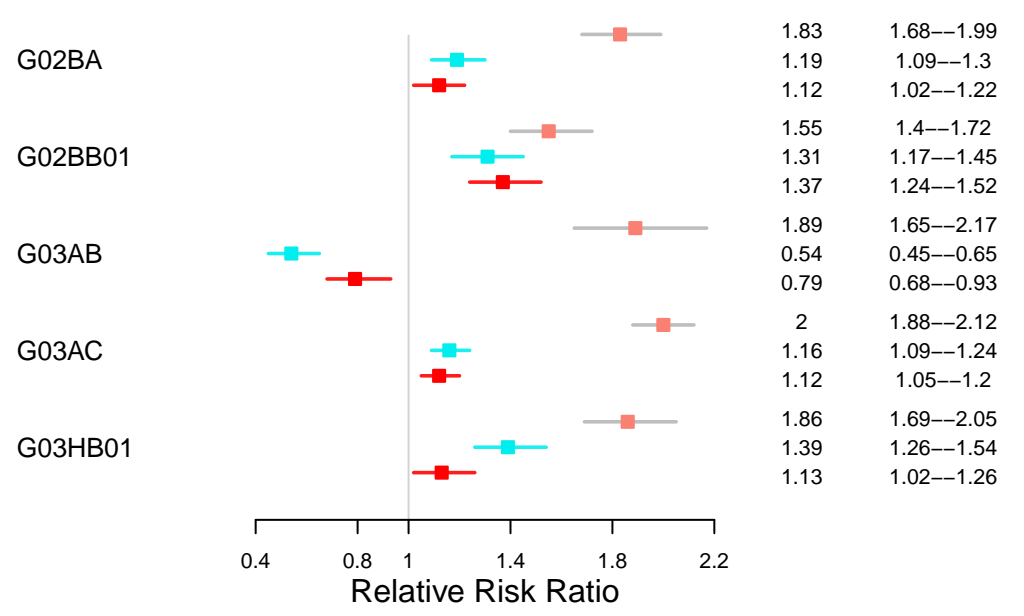

C) HC class

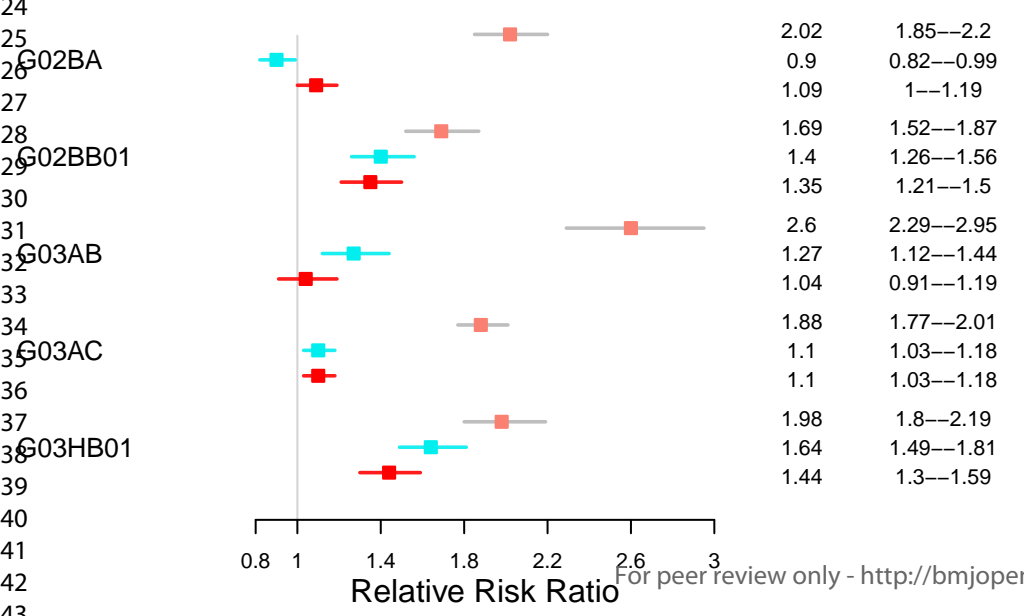

D) HC class

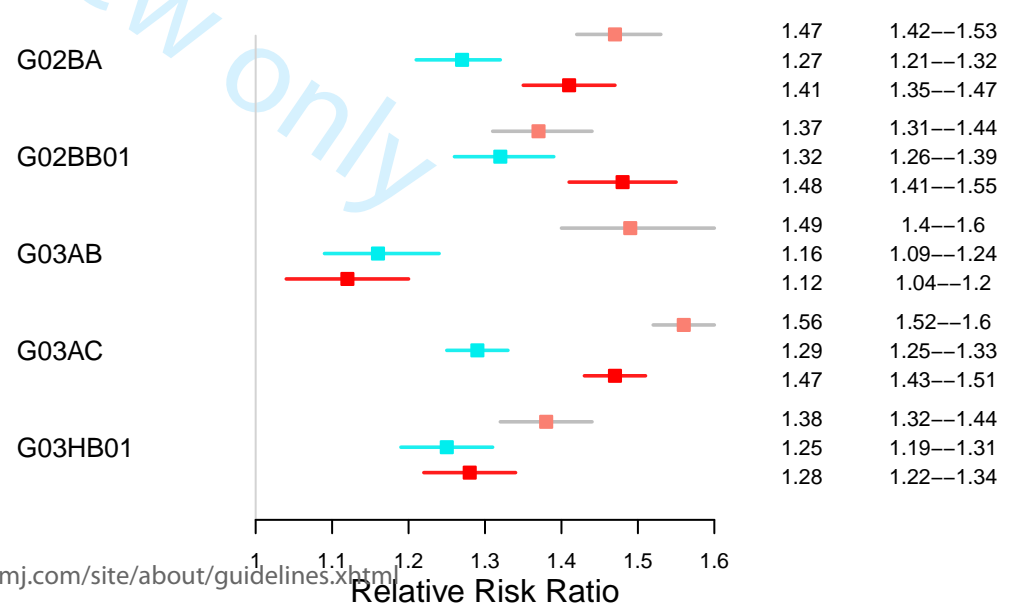

1  
2  
3  
4  
5  
6  
7  
8  
9  
10  
11  
12  
13  
14  
15  
16  
17  
18  
19  
20  
21  
22  
23  
24  
25  
26  
27  
28  
29  
30  
31  
32  
33  
34  
35  
36  
37  
38  
39  
40  
41  
42  
43  
44

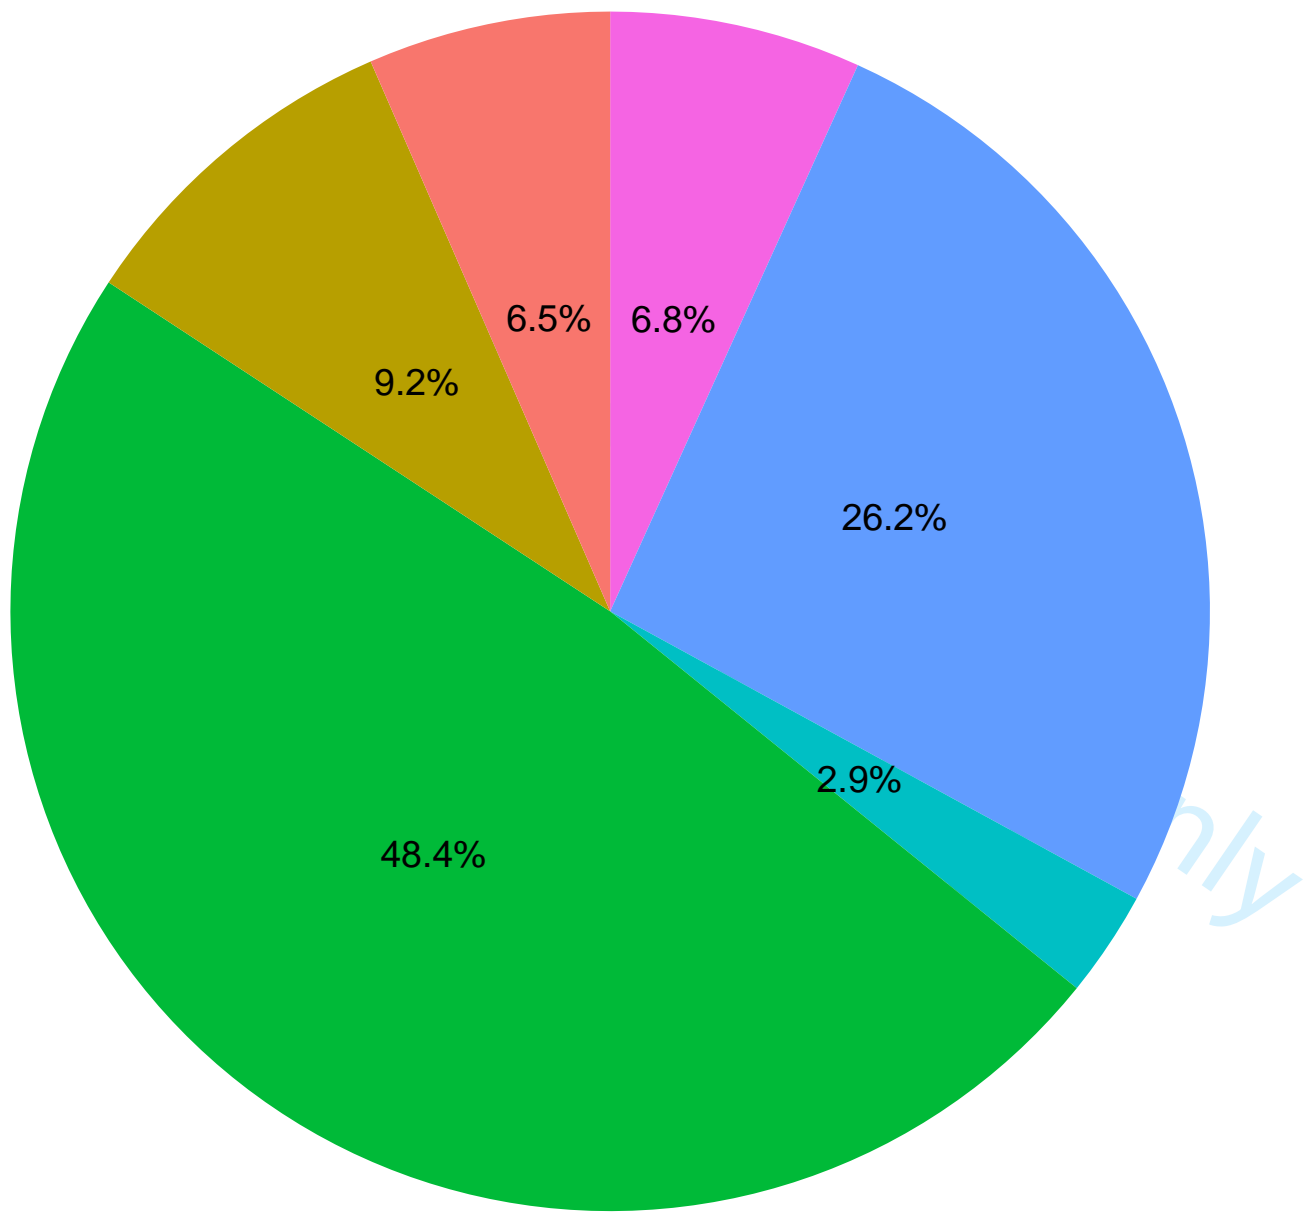

**Types of HC**

- Vaginal ring with progestogen and estrogen
- IUD with progestogen
- Progestogens and estrogens, fixed combinations
- Progestogens and estrogens, sequential preparations
- Progestogens (systemic use)
- Cyproterone and estrogen

Age group

OR

95% CI

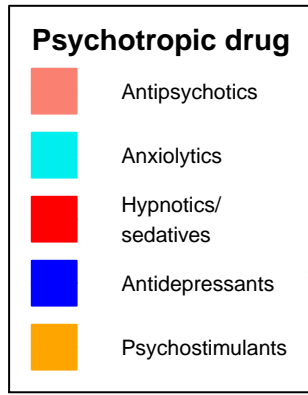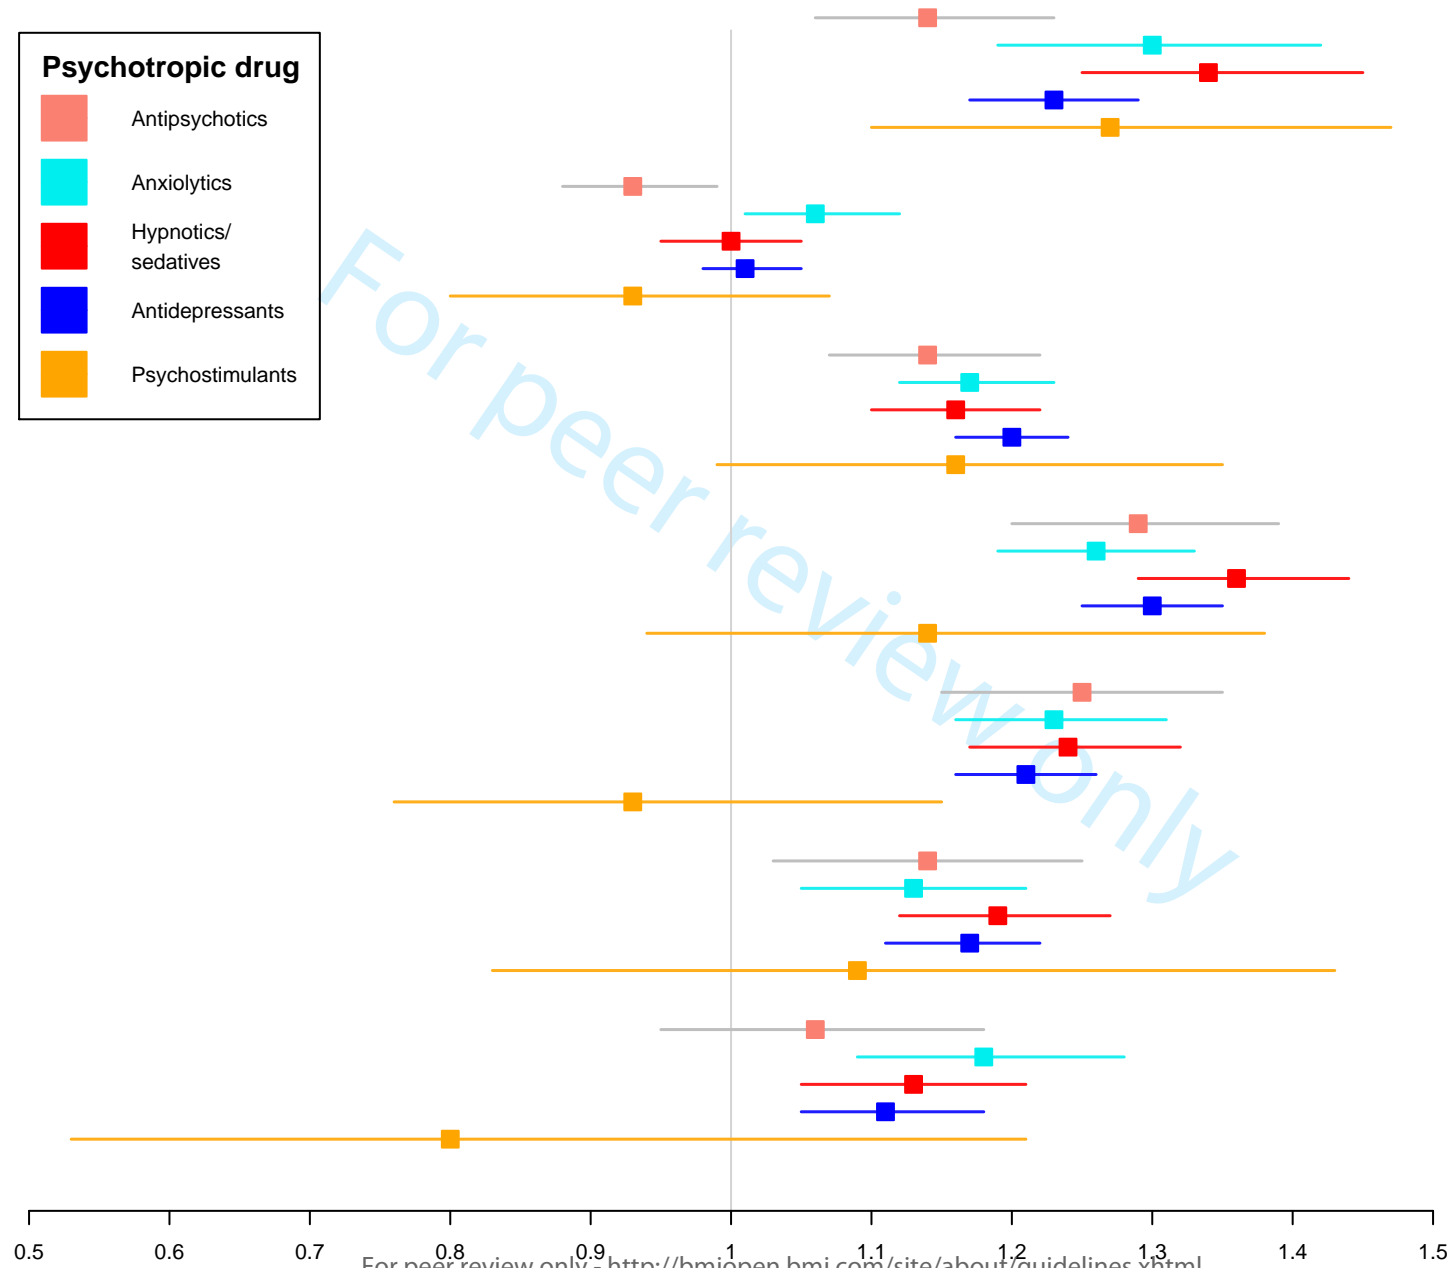

For peer review only - <http://bmjopen.bmj.com/site/about/guidelines.xhtml>

Odds Ratio

0.5 0.6 0.7 0.8 0.9 1 1.1 1.2 1.3 1.4 1.5

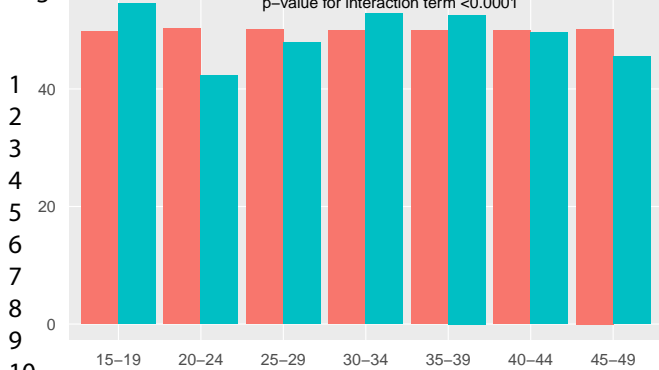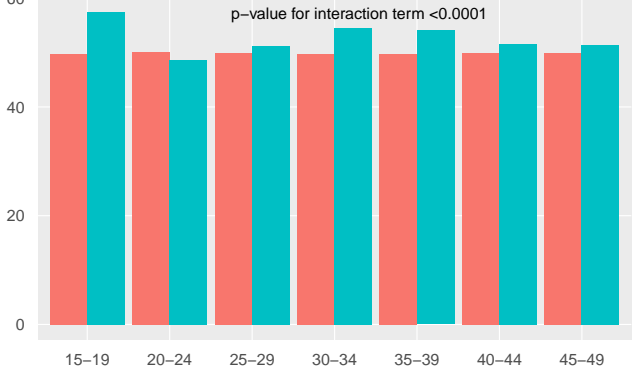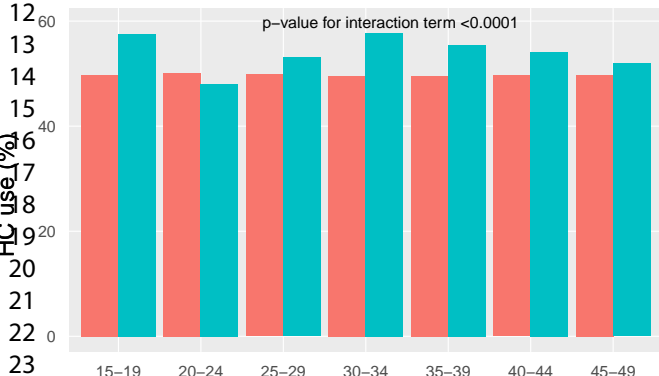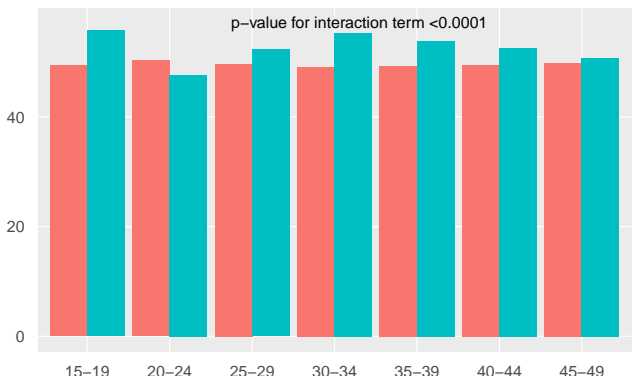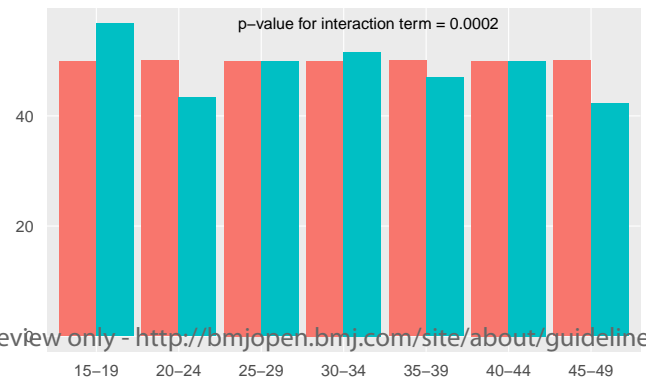

Class of psychotropic medication

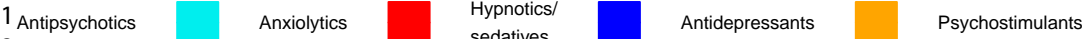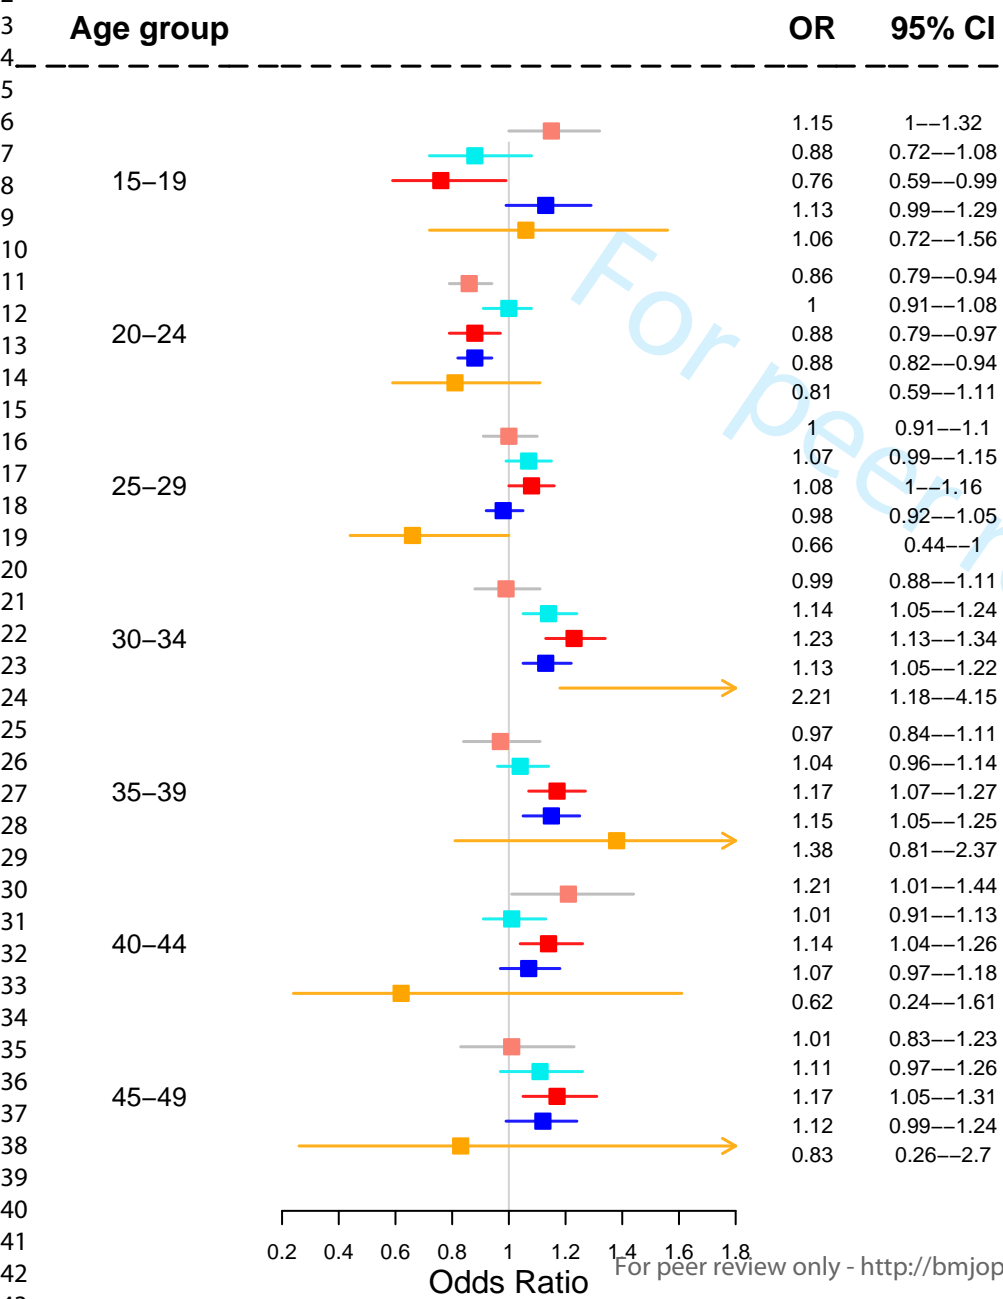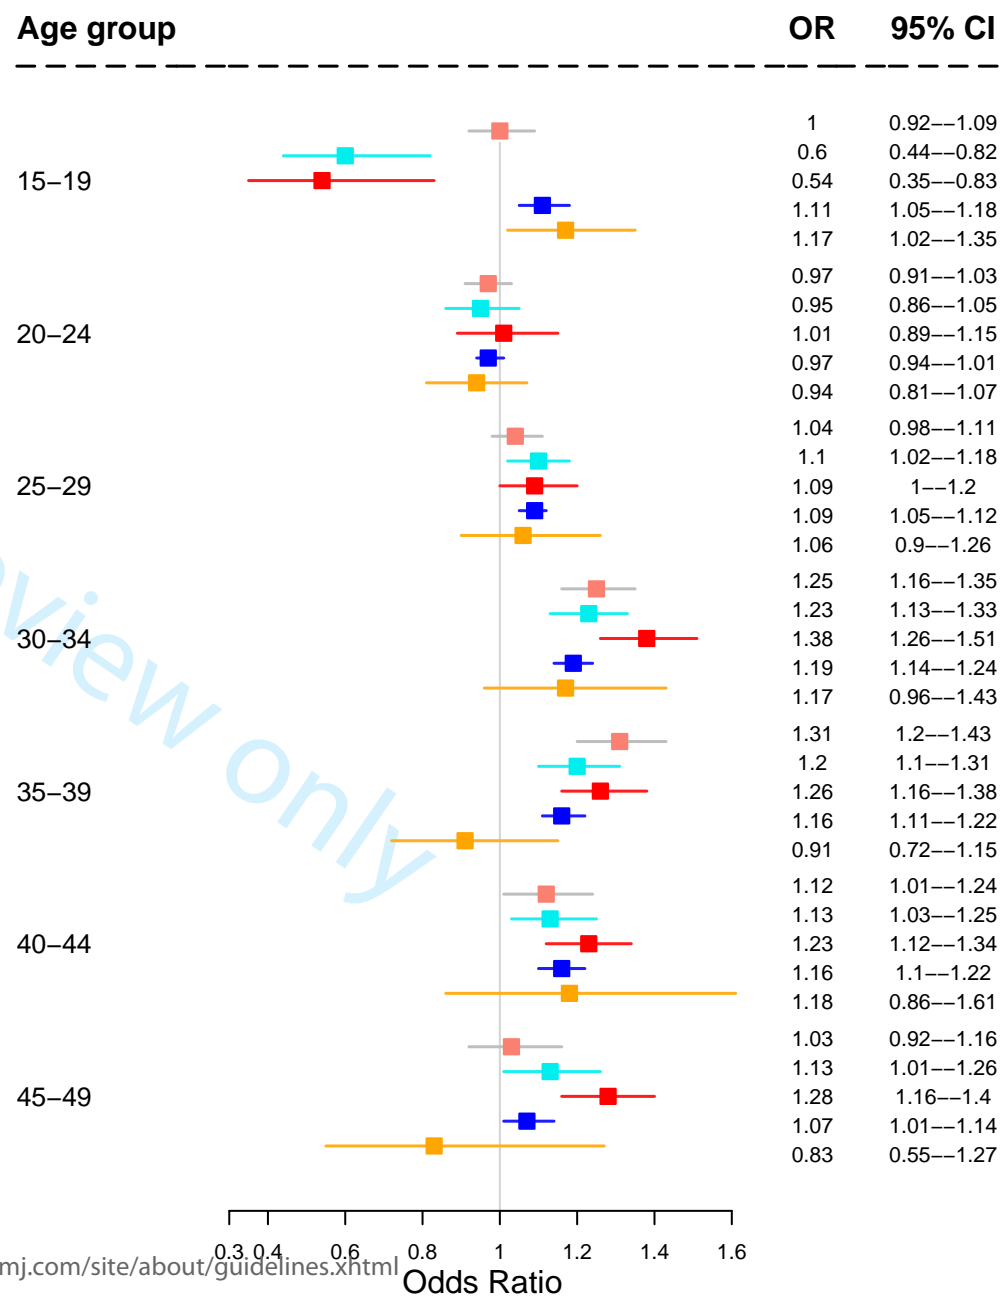

41  
42  
43  
44

### A) Antipsychotics

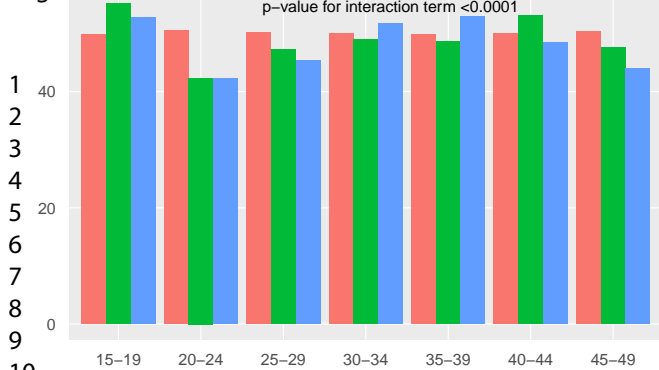

### B) Anxiolytics

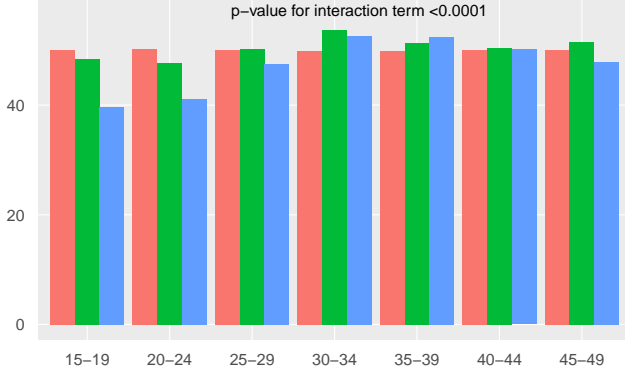

### C) Hypnotics/Sedatives

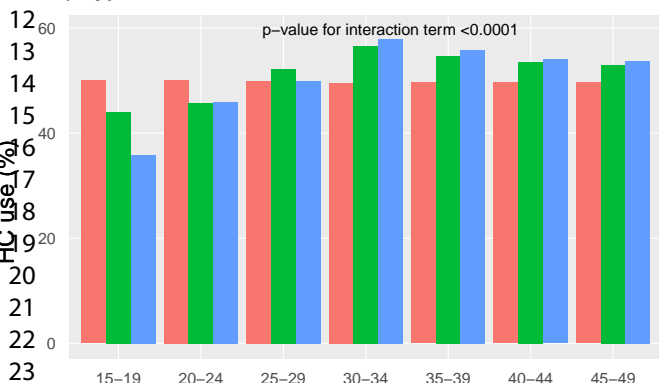

### D) Antidepressants

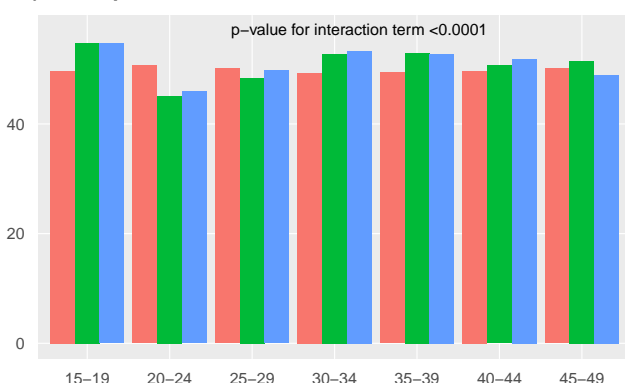

### E) Psychostimulants

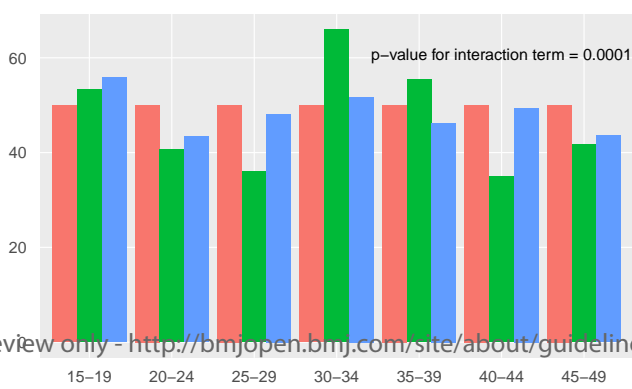

**Type of HC**

- Vaginal ring with progestogen and estrogen
- IUD with progestogen
- Progestogens and estrogens, fixed combinations
- Progestogens and estrogens, sequential preparations
- Progestogens (systemic use)
- Cyproterone and estrogen

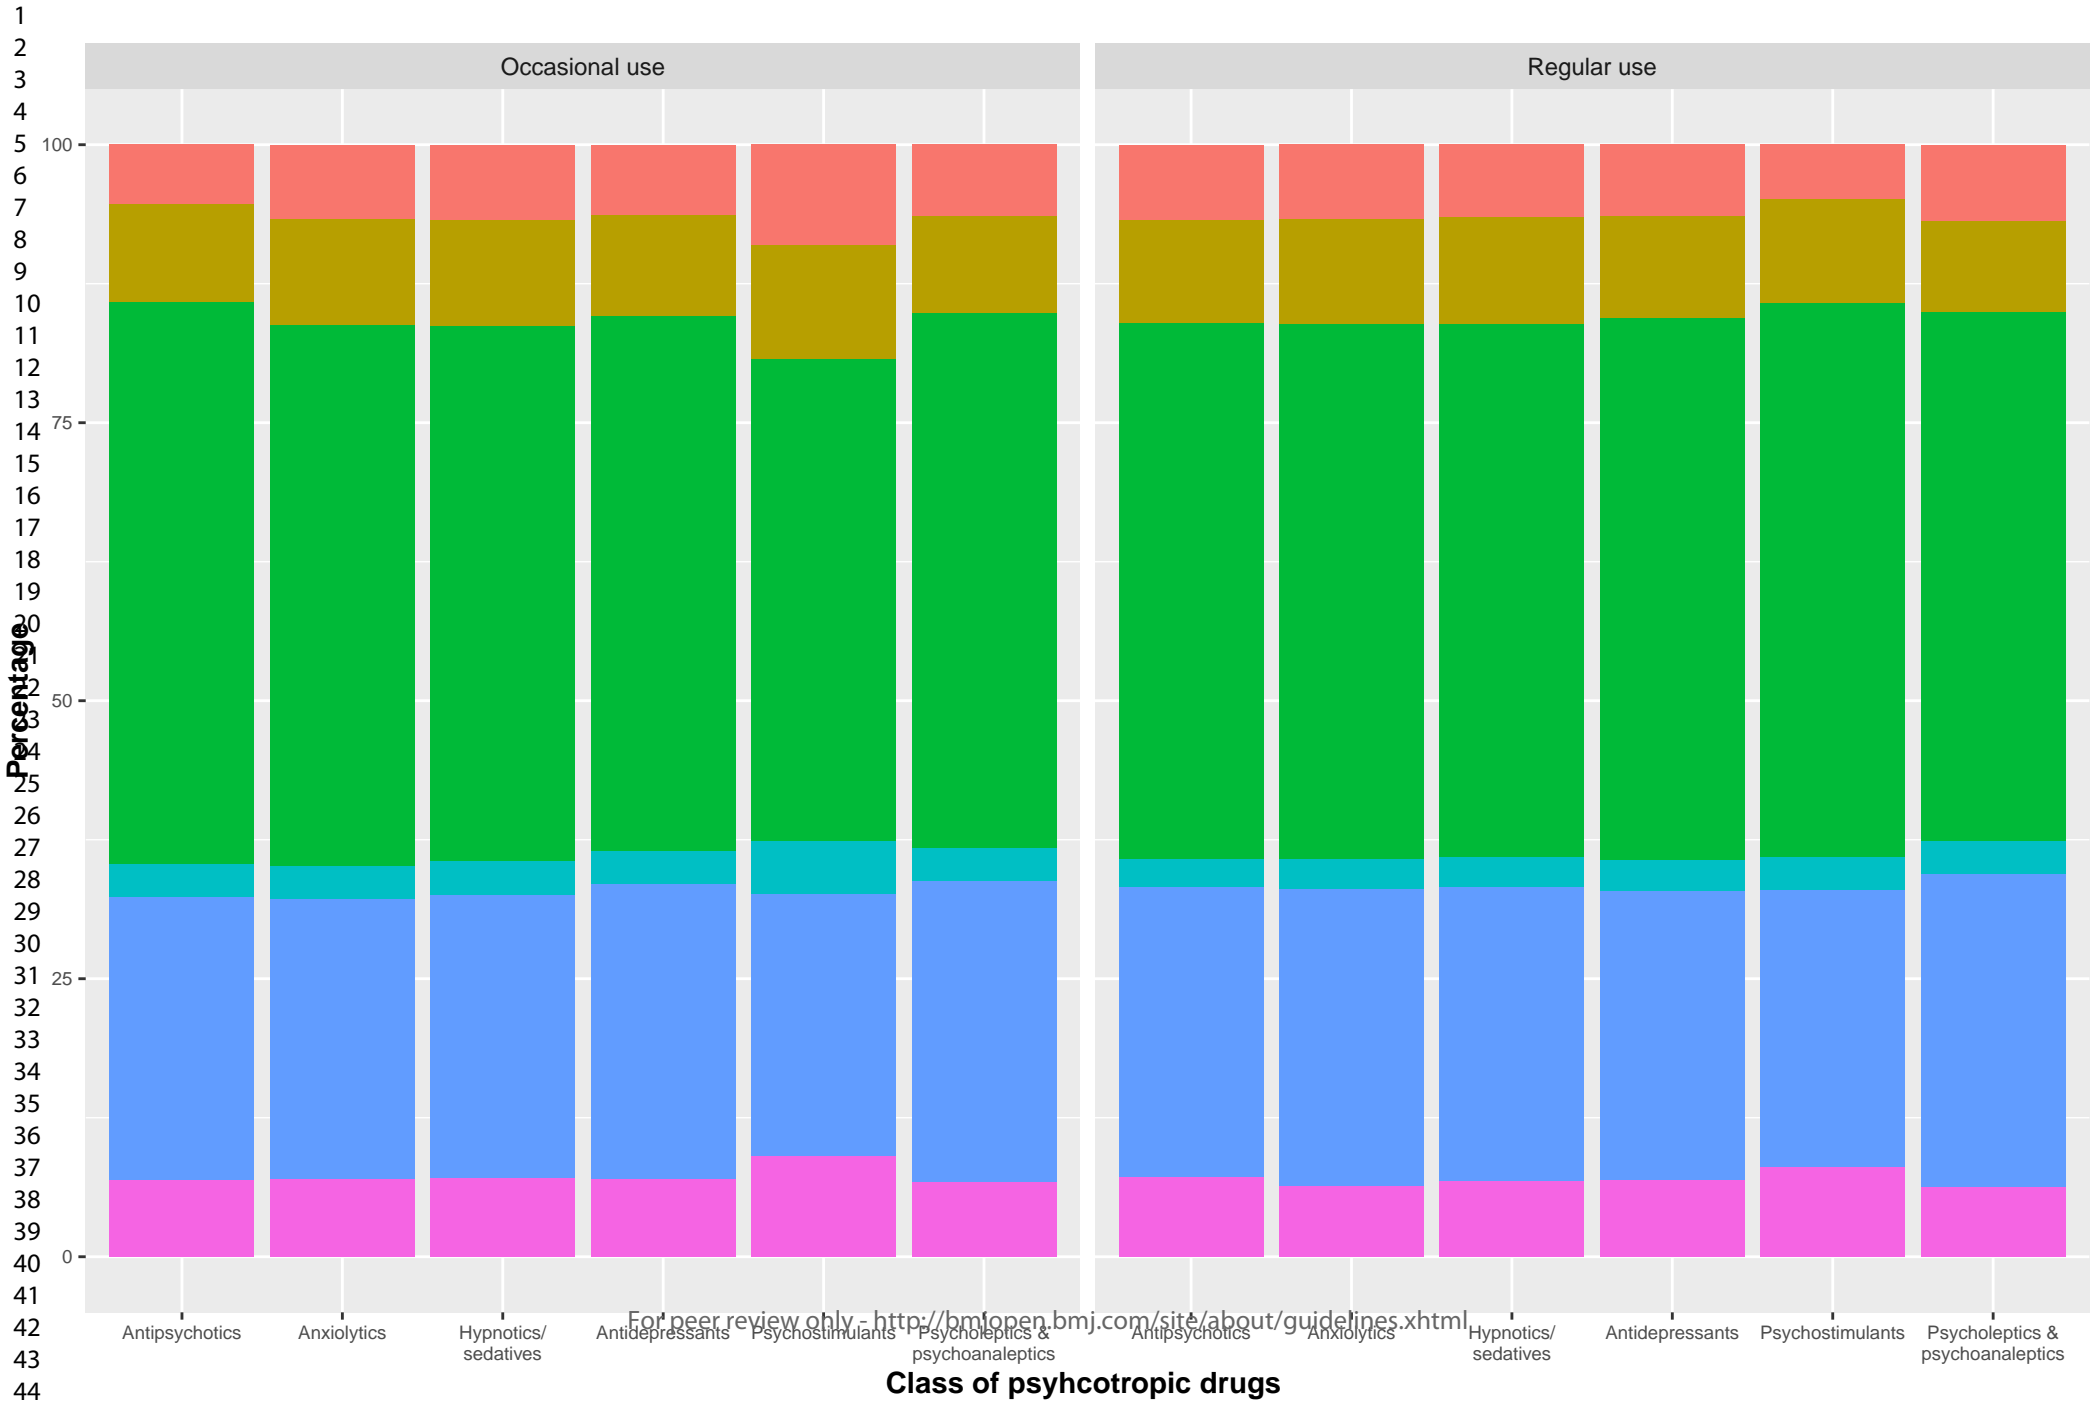



**Supplementary Table 1. Associations between levels of use of psychotropic medications (based on quantiles of redeemed DDD) between 2013 and 2016, and HC use in 2017.**

| Class of psychotropic medication      | Level of use* | Model 1 |              |                 | Model 2 |              |                 | Model 3 |              |                 | Model 4 |              |                 |
|---------------------------------------|---------------|---------|--------------|-----------------|---------|--------------|-----------------|---------|--------------|-----------------|---------|--------------|-----------------|
|                                       |               | OR      | 95% CI       | <i>p</i> -value |
| Antipsychotics                        | Low           | 0.95    | 0.91 to 0.99 | 0.0056          | 1.00    | 0.96 to 1.04 | 0.975           | 1.01    | 0.97 to 1.05 | 0.740           | 1.00    | 0.96 to 1.04 | 0.916           |
|                                       | Intermediate  | 0.92    | 0.88 to 0.96 | 0.0001          | 0.99    | 0.95 to 1.04 | 0.714           | 1.03    | 0.99 to 1.08 | 0.158           | 1.03    | 0.99 to 1.08 | 0.176           |
|                                       | High          | 0.83    | 0.79 to 0.86 | <0.0001         | 0.90    | 0.87 to 0.94 | <0.0001         | 1.06    | 1.02 to 1.10 | 0.0050          | 1.06    | 1.01 to 1.11 | 0.0090          |
| Anxiolytics                           | Low           | 1.04    | 1.00 to 1.09 | 0.0418          | 1.05    | 1.01 to 1.09 | 0.0267          | 1.04    | 1.00 to 1.09 | 0.0557          | 1.03    | 0.99 to 1.08 | 0.117           |
|                                       | Intermediate  | 1.00    | 0.96 to 1.04 | 0.959           | 1.02    | 0.98 to 1.07 | 0.292           | 1.04    | 1.00 to 1.09 | 0.0507          | 1.04    | 1.00 to 1.09 | 0.074           |
|                                       | High          | 0.93    | 0.89 to 0.97 | 0.0008          | 1.01    | 0.97 to 1.06 | 0.545           | 1.14    | 1.09 to 1.19 | <0.0001         | 1.14    | 1.09 to 1.19 | <0.0001         |
| Hypnotics/<br>sedatives               | Low           | 1.13    | 1.09 to 1.17 | <0.0001         | 1.11    | 1.08 to 1.15 | <0.0001         | 1.08    | 1.05 to 1.12 | <0.0001         | 1.08    | 1.04 to 1.12 | <0.0001         |
|                                       | High          | 1.16    | 1.12 to 1.20 | <0.0001         | 1.16    | 1.12 to 1.21 | <0.0001         | 1.20    | 1.15 to 1.24 | <0.0001         | 1.21    | 1.16 to 1.25 | <0.0001         |
| Antidepressants                       | Low           | 1.00    | 0.98 to 1.02 | 0.9113          | 1.03    | 1.01 to 1.05 | 0.0168          | 1.02    | 1.00 to 1.05 | 0.084           | 1.02    | 1.00 to 1.05 | 0.098           |
|                                       | Intermediate  | 1.02    | 1.00 to 1.05 | 0.0543          | 1.05    | 1.03 to 1.08 | 0.0001          | 1.06    | 1.04 to 1.09 | <0.0001         | 1.06    | 1.04 to 1.09 | <0.0001         |
|                                       | High          | 1.02    | 1.00 to 1.05 | 0.0772          | 1.04    | 1.02 to 1.07 | 0.0014          | 1.10    | 1.08 to 1.13 | <0.0001         | 1.10    | 1.08 to 1.13 | <0.0001         |
| Psychostimulants                      | Low           | 0.88    | 0.79 to 0.98 | 0.019           | 0.94    | 0.84 to 1.05 | 0.261           | 0.96    | 0.86 to 1.07 | 0.415           | 0.95    | 0.85 to 1.06 | 0.394           |
|                                       | Intermediate  | 0.92    | 0.82 to 1.03 | 0.151           | 0.98    | 0.88 to 1.11 | 0.790           | 1.00    | 0.89 to 1.13 | 0.972           | 1.00    | 0.89 to 1.12 | 0.956           |
|                                       | High          | 1.03    | 0.92 to 1.15 | 0.674           | 1.11    | 0.99 to 1.24 | 0.071           | 1.13    | 1.00 to 1.26 | 0.043           | 1.12    | 1.00 to 1.26 | 0.046           |
| Psycholeptics and<br>psychoanaleptics | Low           | 1.22    | 1.10 to 1.36 | 0.0001          | 1.21    | 1.09 to 1.34 | 0.0004          | 1.19    | 1.07 to 1.32 | 0.0011          | 1.20    | 1.08 to 1.33 | 0.0010          |
|                                       | High          | 1.27    | 1.14-1.42    | <0.0003         | 1.29    | 1.15 to 1.44 | <0.0001         | 1.33    | 1.19 to 1.49 | <0.0001         | 1.34    | 1.19 to 1.50 | <0.0001         |

Model 1 is the unadjusted model; Model 2 is Model 1 adjusted for age group, education and marital status; Model 3 is Model 2 adjusted for socioeconomic status and income level; Model 4 is Model 3 adjusted for recent pregnancy (in 2017), abortion (in 2016-2017) and sterilization (before 2017). DDD, defined daily dose; HC, hormonal contraception.

1  
2 \* Level of use of psychotropic medications was based on quantiles of purchased DDD (tertiles for antipsychotics, anxiolytics, antidepressants and  
3 psychostimulants; 50<sup>th</sup> percentile for hypnotics/sedatives, and 60<sup>th</sup> percentile for psycholeptics and psychoanaleptics in combination.  
4  
5  
6  
7  
8  
9  
10  
11  
12  
13  
14  
15  
16  
17  
18  
19  
20  
21  
22  
23  
24  
25  
26  
27  
28  
29  
30  
31  
32  
33  
34  
35  
36  
37  
38  
39  
40  
41  
42  
43  
44  
45  
46

For peer review only

**Supplementary Table 2. Multinomial logistic regression models among HC users, showing the associations between levels of use of psychotropic medications (based on quantiles of redeemed DDD) between 2013 and 2016, and type of HC used in 2017.**

| Class of HC*                                                                    | Level of use <sup>†</sup> | Model 1 |              |         | Model 2 |              |         | Model 3 |              |         |
|---------------------------------------------------------------------------------|---------------------------|---------|--------------|---------|---------|--------------|---------|---------|--------------|---------|
|                                                                                 |                           | RRR     | 95% CI       | p-value | RRR     | 95% CI       | p-value | RRR     | 95% CI       | p-value |
| <b>Antipsychotics</b>                                                           |                           |         |              |         |         |              |         |         |              |         |
| <b>G02BA</b> IUD with progestogen                                               | Low                       | 0.94    | 0.85 to 1.04 | 0.238   | 0.94    | 0.84 to 1.04 | 0.204   | 1.03    | 0.94 to 1.13 | 0.543   |
|                                                                                 | Intermediate              | 1.18    | 1.05 to 1.31 | 0.0045  | 1.01    | 1.91 to 1.13 | 0.847   | 1.25    | 1.12 to 1.40 | 0.0001  |
|                                                                                 | High                      | 1.45    | 1.30 to 1.61 | <0.0001 | 1.14    | 1.02 to 1.27 | 0.021   | 1.92    | 1.73 to 2.12 | <0.0001 |
| <b>G02BB01</b> vaginal ring with progestogen and estrogen                       | Low                       | 1.04    | 0.92 to 1.16 | 0.557   | 0.92    | 0.82 to 1.04 | 0.185   | 0.92    | 0.82 to 1.03 | 0.155   |
|                                                                                 | Intermediate              | 1.08    | 0.95 to 1.24 | 0.247   | 1.27    | 1.13 to 1.42 | 0.0001  | 1.02    | 0.89 to 1.17 | 0.790   |
|                                                                                 | High                      | 0.99    | 0.85 to 1.14 | 0.838   | 0.90    | 0.78 to 1.03 | 0.112   | 1.92    | 1.71 to 2.15 | <0.0001 |
| <b>G03AB</b> Progestogens and estrogens, sequential preparations (systemic use) | Low                       | 0.92    | 0.77 to 1.10 | 0.364   | 1.14    | 0.98 to 1.32 | 0.086   | 1.03    | 0.88 to 1.19 | 0.730   |
|                                                                                 | Intermediate              | 1.24    | 1.03 to 1.49 | 0.023   | 0.88    | 0.73 to 1.06 | 0.187   | 0.27    | 0.19 to 0.38 | <0.0001 |
|                                                                                 | High                      | 1.35    | 1.12 to 1.62 | 0.0016  | 1.03    | 0.87 to 1.22 | 0.762   | 0.93    | 0.75 to 1.15 | 0.487   |
| <b>G03AC</b> Progestogens (systemic use)                                        | Low                       | 1.30    | 1.22 to 1.38 | <0.0001 | 1.00    | 0.94 to 1.07 | 0.960   | 0.70    | 0.65 to 0.76 | <0.0001 |
|                                                                                 | Intermediate              | 1.46    | 1.36 to 1.57 | <0.0001 | 0.96    | 0.89 to 1.04 | 0.341   | 1.58    | 1.48 to 1.70 | <0.0001 |
|                                                                                 | High                      | 2.10    | 1.96 to 2.25 | <0.0001 | 0.78    | 0.72 to 0.85 | <0.0001 | 1.19    | 1.10 to 1.29 | <0.0001 |
| <b>G03HB01</b> cyproterone and estrogen                                         | Low                       | 1.07    | 0.96 to 1.20 | 0.239   | 1.12    | 1.00 to 1.25 | 0.048   | 1.10    | 0.99 to 1.22 | 0.067   |
|                                                                                 | Intermediate              | 1.37    | 1.22 to 1.54 | <0.0001 | 0.86    | 0.75 to 0.98 | 0.028   | 1.43    | 1.28 to 1.61 | <0.0001 |
|                                                                                 | High                      | 1.52    | 1.35 to 1.72 | <0.0001 | 1.02    | 0.90 to 1.16 | 0.785   | 1.80    | 1.60 to 2.01 | <0.0001 |
| <b>Anxiolytics</b>                                                              |                           |         |              |         |         |              |         |         |              |         |
| <b>G02BA</b> IUD with progestogen                                               | Low                       | 1.55    | 1.40 to 1.71 | <0.0001 | 1.34    | 1.21 to 1.47 | <0.001  | 1.13    | 1.02 to 1.25 | 0.018   |
|                                                                                 | Intermediate              | 1.84    | 1.66 to 2.04 | <0.0001 | 1.01    | 0.91 to 1.13 | 0.855   | 0.98    | 0.88 to 1.10 | 0.739   |
|                                                                                 | High                      | 1.75    | 1.56 to 1.96 | <0.0001 | 0.74    | 0.65 to 0.84 | <0.0001 | 1.13    | 1.02 to 1.26 | 0.026   |
|                                                                                 | Low                       | 1.67    | 1.49 to 1.87 | <0.0001 | 1.41    | 1.27 to 1.58 | <0.0001 | 0.88    | 0.78 to 1.01 | 0.061   |

|                                                                                 |              |      |              |         |      |              |         |      |              |         |
|---------------------------------------------------------------------------------|--------------|------|--------------|---------|------|--------------|---------|------|--------------|---------|
| <b>G02BB01</b> vaginal ring with progestogen and estrogen                       | Intermediate | 1.58 | 1.40 to 1.78 | <0.0001 | 1.00 | 0.88 to 1.14 | 0.985   | 0.82 | 0.71 to 0.94 | 0.0042  |
|                                                                                 | High         | 1.47 | 1.28 to 1.68 | <0.0001 | 0.97 | 0.85 to 1.11 | 0.658   | 0.75 | 0.65 to 0.86 | 0.0001  |
| <b>G03AB</b> Progestogens and estrogens, sequential preparations (systemic use) | Low          | 1.34 | 1.12 to 1.60 | 0.0014  | 0.60 | 0.48 to 0.75 | <0.0001 | 0.86 | 0.71 to 1.03 | 0.099   |
|                                                                                 | Intermediate | 1.92 | 1.63 to 2.26 | <0.0001 | 0.86 | 0.71 to 1.04 | 0.119   | 0.99 | 0.83 to 1.18 | 0.930   |
|                                                                                 | High         | 1.93 | 1.62 to 2.30 | <0.0001 | 0.97 | 0.80 to 1.17 | 0.750   | 0.29 | 0.21 to 0.40 | <0.0001 |
| <b>G03AC</b> Progestogens (systemic use)                                        | Low          | 1.62 | 1.51 to 1.74 | <0.0001 | 0.93 | 0.86 to 1.00 | 0.065   | 1.10 | 1.02 to 1.18 | 0.0125  |
|                                                                                 | Intermediate | 1.75 | 1.62 to 1.88 | <0.0001 | 1.01 | 0.94 to 1.09 | 0.764   | 1.10 | 1.02 to 1.18 | 0.0138  |
|                                                                                 | High         | 2.16 | 2.01 to 2.34 | <0.0001 | 0.85 | 0.78 to 0.92 | 0.0001  | 0.86 | 0.79 to 0.93 | 0.0001  |
| <b>G03HB01</b> cyproterone and estrogen                                         | Low          | 1.42 | 1.26 to 1.60 | <0.0001 | 1.46 | 1.32 to 1.63 | <0.0001 | 0.91 | 0.81 to 1.04 | 0.156   |
|                                                                                 | Intermediate | 1.68 | 1.49 to 1.89 | <0.0001 | 1.14 | 1.01 to 1.28 | 0.0038  | 0.88 | 0.78 to 1.01 | 0.062   |
|                                                                                 | High         | 2.04 | 1.81 to 2.30 | <0.0001 | 1.63 | 1.46 to 1.82 | <0.0001 | 0.62 | 0.53 to 0.72 | <0.0001 |
| <b>Hypnotics/Sedatives</b>                                                      |              |      |              |         |      |              |         |      |              |         |
| <b>G02BA</b> IUD with progestogen                                               | Low          | 1.70 | 1.56 to 1.85 | <0.0001 | 0.88 | 0.80 to 0.97 | 0.010   | 0.70 | 0.64 to 0.78 | <0.0001 |
|                                                                                 | High         | 2.14 | 1.96 to 2.33 | <0.0001 | 1.54 | 1.41 to 1.67 | <0.0001 | 0.88 | 0.79 to 0.97 | 0.012   |
| <b>G02BB01</b> vaginal ring with progestogen and estrogen                       | Low          | 1.63 | 1.48 to 1.79 | <0.0001 | 1.11 | 1.00 to 1.22 | 0.0514  | 1.16 | 1.06 to 1.28 | 0.0020  |
|                                                                                 | High         | 1.70 | 1.52 to 1.89 | <0.0001 | 1.00 | 0.89 to 1.12 | 0.948   | 1.55 | 1.41 to 1.71 | <0.0001 |
| <b>G03AB</b> Progestogens and estrogens, sequential preparations (systemic use) | Low          | 1.89 | 1.66 to 2.16 | <0.0001 | 0.76 | 0.65 to 0.89 | 0.0008  | 1.27 | 1.12 to 1.45 | 0.0004  |
|                                                                                 | High         | 2.69 | 2.37 to 3.06 | <0.0001 | 1.27 | 1.10 to 1.46 | 0.0011  | 0.95 | 0.80 to 1.12 | 0.523   |
| <b>G03AC</b> Progestogens (systemic use)                                        | Low          | 1.60 | 1.51 to 1.70 | <0.0001 | 1.07 | 1.01 to 1.14 | 0.0329  | 0.79 | 0.74 to 0.84 | <0.0001 |
|                                                                                 | High         | 1.93 | 1.81 to 2.06 | <0.0001 | 1.06 | 0.99 to 1.13 | 0.093   | 1.35 | 1.27 to 1.44 | 0.007   |
| <b>G03HB01</b> cyproterone and estrogen                                         | Low          | 1.48 | 1.34 to 1.64 | <0.0001 | 1.10 | 1.00 to 1.22 | 0.060   | 0.93 | 0.84 to 1.03 | 0.138   |
|                                                                                 | High         | 2.03 | 1.84 to 2.24 | <0.0001 | 1.41 | 1.28 to 1.56 | <0.0001 | 1.06 | 0.95 to 1.19 | 0.282   |
| <b>Antidepressants</b>                                                          |              |      |              |         |      |              |         |      |              |         |
| <b>G02BA</b> IUD with progestogen                                               | Low          | 1.30 | 1.23 to 1.39 | <0.0001 | 0.95 | 0.89 to 1.01 | 0.085   | 0.88 | 0.82 to 0.94 | 0.0001  |
|                                                                                 | Intermediate | 1.37 | 1.29 to 1.46 | <0.0001 | 1.29 | 1.22 to 1.36 | <0.0001 | 0.95 | 0.89 to 1.01 | 0.089   |

|                                                                                 |              |      |              |         |      |              |         |      |              |         |
|---------------------------------------------------------------------------------|--------------|------|--------------|---------|------|--------------|---------|------|--------------|---------|
|                                                                                 | High         | 1.73 | 1.63 to 1.83 | <0.0001 | 0.76 | 0.71 to 0.81 | <0.0001 | 0.89 | 0.84 to 0.95 | 0.0005  |
| <b>G02BB01</b> vaginal ring with progestogen and estrogen                       | Low          | 1.40 | 1.31 to 1.50 | <0.0001 | 0.89 | 0.83 to 0.96 | 0.0223  | 1.06 | 0.99 to 1.13 | 0.121   |
|                                                                                 | Intermediate | 1.31 | 1.22 to 1.40 | <0.0001 | 1.00 | 0.93 to 1.07 | 0.919   | 1.06 | 0.99 to 1.14 | 0.102   |
|                                                                                 | High         | 1.45 | 1.36 to 1.56 | <0.0001 | 1.16 | 1.09 to 1.24 | <0.0001 | 0.95 | 0.88 to 1.02 | 0.132   |
| <b>G03AB</b> Progestogens and estrogens, sequential preparations (systemic use) | Low          | 1.46 | 1.33 to 1.61 | <0.0001 | 1.00 | 0.91 to 1.11 | 0.933   | 1.02 | 0.93 to 1.13 | 0.664   |
|                                                                                 | Intermediate | 1.38 | 1.25 to 1.52 | <0.0001 | 0.79 | 0.71 to 0.88 | <0.0001 | 0.90 | 0.81 to 0.99 | 0.0381  |
|                                                                                 | High         | 1.74 | 1.58 to 1.91 | <0.0001 | 0.98 | 0.89 to 1.09 | 0.738   | 0.95 | 0.85 to 1.05 | 0.268   |
| <b>G03AC</b> Progestogens (systemic use)                                        | Low          | 1.49 | 1.44 to 1.56 | <0.0001 | 1.00 | 0.96 to 1.04 | 0.887   | 0.98 | 0.94 to 1.02 | 0.387   |
|                                                                                 | Intermediate | 1.42 | 1.37 to 1.48 | <0.0001 | 1.02 | 0.98 to 1.07 | 0.362   | 1.01 | 0.97 to 1.06 | 0.544   |
|                                                                                 | High         | 1.79 | 1.72 to 1.87 | <0.0001 | 0.89 | 0.85 to 0.93 | <0.0001 | 0.90 | 0.87 to 0.94 | <0.0001 |
| <b>G03HB01</b> cyproterone and estrogen                                         | Low          | 1.19 | 1.11 to 1.28 | <0.0001 | 0.98 | 0.92 to 1.05 | 0.609   | 1.00 | 0.93 to 1.07 | 0.972   |
|                                                                                 | Intermediate | 1.29 | 1.21 to 1.39 | <0.0001 | 1.24 | 1.16 to 1.32 | <0.0001 | 0.89 | 0.82 to 0.95 | 0.0011  |
|                                                                                 | High         | 1.59 | 1.48 to 1.70 | <0.0001 | 0.99 | 0.92 to 1.06 | 0.786   | 1.01 | 0.94 to 1.08 | 0.836   |

Model 1 is the unadjusted model; Model 2 is Model 1 adjusted for age, marital and socioeconomic status, education and income level; Model 3 is Model 2 adjusted for abortion and pregnancy in 2016-2017.

\*Reference: G03AA, Progestogens and estrogens, fixed combinations (systemic use).

† Level of use of psychotropic medications was based on quantiles of purchased DDD (tertiles for antipsychotics, anxiolytics, antidepressants and psychostimulants; 50<sup>th</sup> percentile for hypnotics/sedatives, and 60<sup>th</sup> percentile for psycholeptics and psychoanaleptics in combination.

DDD, defined daily dose; HC, hormonal contraception; RRR, relative risk ratio.

**STROBE 2007 (v4) checklist of items to be included in reports of observational studies in epidemiology\***  
**Checklist for cohort, case-control, and cross-sectional studies (combined)**

| Section/Topic             | Item # | Recommendation                                                                                                                                                                                                                                                                                                                                                                                                                                                         | Reported on page # |
|---------------------------|--------|------------------------------------------------------------------------------------------------------------------------------------------------------------------------------------------------------------------------------------------------------------------------------------------------------------------------------------------------------------------------------------------------------------------------------------------------------------------------|--------------------|
| Title and abstract        | 1      | (a) Indicate the study's design with a commonly used term in the title or the abstract                                                                                                                                                                                                                                                                                                                                                                                 | 1                  |
|                           |        | (b) Provide in the abstract an informative and balanced summary of what was done and what was found                                                                                                                                                                                                                                                                                                                                                                    | 2                  |
| <b>Introduction</b>       |        |                                                                                                                                                                                                                                                                                                                                                                                                                                                                        |                    |
| Background/rationale      | 2      | Explain the scientific background and rationale for the investigation being reported                                                                                                                                                                                                                                                                                                                                                                                   | 4                  |
| Objectives                | 3      | State specific objectives, including any pre-specified hypotheses                                                                                                                                                                                                                                                                                                                                                                                                      | 4                  |
| <b>Methods</b>            |        |                                                                                                                                                                                                                                                                                                                                                                                                                                                                        |                    |
| Study design              | 4      | Present key elements of study design early in the paper                                                                                                                                                                                                                                                                                                                                                                                                                | 5                  |
| Setting                   | 5      | Describe the setting, locations, and relevant dates, including periods of recruitment, exposure, follow-up, and data collection                                                                                                                                                                                                                                                                                                                                        | 5-6                |
| Participants              | 6      | (a) <i>Cohort study</i> —Give the eligibility criteria, and the sources and methods of selection of participants. Describe methods of follow-up<br><i>Case-control study</i> —Give the eligibility criteria, and the sources and methods of case ascertainment and control selection. Give the rationale for the choice of cases and controls<br><i>Cross-sectional study</i> —Give the eligibility criteria, and the sources and methods of selection of participants | 5                  |
|                           |        | (b) <i>Cohort study</i> —For matched studies, give matching criteria and number of exposed and unexposed<br><i>Case-control study</i> —For matched studies, give matching criteria and the number of controls per case                                                                                                                                                                                                                                                 | 5                  |
| Variables                 | 7      | Clearly define all outcomes, exposures, predictors, potential confounders, and effect modifiers. Give diagnostic criteria, if applicable                                                                                                                                                                                                                                                                                                                               | 5-6                |
| Data sources/ measurement | 8*     | For each variable of interest, give sources of data and details of methods of assessment (measurement). Describe comparability of assessment methods if there is more than one group                                                                                                                                                                                                                                                                                   | 5-6                |
| Bias                      | 9      | Describe any efforts to address potential sources of bias                                                                                                                                                                                                                                                                                                                                                                                                              | 6,7                |
| Study size                | 10     | Explain how the study size was arrived at                                                                                                                                                                                                                                                                                                                                                                                                                              | 5                  |
| Quantitative variables    | 11     | Explain how quantitative variables were handled in the analyses. If applicable, describe which groupings were chosen and why                                                                                                                                                                                                                                                                                                                                           | 5-7                |
| Statistical methods       | 12     | (a) Describe all statistical methods, including those used to control for confounding                                                                                                                                                                                                                                                                                                                                                                                  | 6,7                |
|                           |        | (b) Describe any methods used to examine subgroups and interactions                                                                                                                                                                                                                                                                                                                                                                                                    | 6,7                |
|                           |        | (c) Explain how missing data were addressed                                                                                                                                                                                                                                                                                                                                                                                                                            |                    |
|                           |        | (d) <i>Cohort study</i> —If applicable, explain how loss to follow-up was addressed<br><i>Case-control study</i> —If applicable, explain how matching of cases and controls was addressed                                                                                                                                                                                                                                                                              | 5,6                |

|                          |     |                                                                                                                                                                                                              |        |
|--------------------------|-----|--------------------------------------------------------------------------------------------------------------------------------------------------------------------------------------------------------------|--------|
|                          |     | <i>Cross-sectional study</i> —If applicable, describe analytical methods taking account of sampling strategy                                                                                                 |        |
|                          |     | (e) Describe any sensitivity analyses                                                                                                                                                                        | 6,7    |
| <b>Results</b>           |     |                                                                                                                                                                                                              |        |
| Participants             | 13* | (a) Report numbers of individuals at each stage of study—eg numbers potentially eligible, examined for eligibility, confirmed eligible, included in the study, completing follow-up, and analysed            | 5      |
|                          |     | (b) Give reasons for non-participation at each stage                                                                                                                                                         |        |
|                          |     | (c) Consider use of a flow diagram                                                                                                                                                                           |        |
| Descriptive data         | 14* | (a) Give characteristics of study participants (eg demographic, clinical, social) and information on exposures and potential confounders                                                                     | 6,7,12 |
|                          |     | (b) Indicate number of participants with missing data for each variable of interest                                                                                                                          |        |
|                          |     | (c) <i>Cohort study</i> —Summarise follow-up time (eg, average and total amount)                                                                                                                             |        |
| Outcome data             | 15* | <i>Cohort study</i> —Report numbers of outcome events or summary measures over time                                                                                                                          |        |
|                          |     | <i>Case-control study</i> —Report numbers in each exposure category, or summary measures of exposure                                                                                                         | 6-14   |
|                          |     | <i>Cross-sectional study</i> —Report numbers of outcome events or summary measures                                                                                                                           |        |
| Main results             | 16  | (a) Give unadjusted estimates and, if applicable, confounder-adjusted estimates and their precision (eg, 95% confidence interval). Make clear which confounders were adjusted for and why they were included | 6-14   |
|                          |     | (b) Report category boundaries when continuous variables were categorized                                                                                                                                    | 6,7    |
|                          |     | (c) If relevant, consider translating estimates of relative risk into absolute risk for a meaningful time period                                                                                             |        |
| Other analyses           | 17  | Report other analyses done—eg analyses of subgroups and interactions, and sensitivity analyses                                                                                                               | 7-14   |
| <b>Discussion</b>        |     |                                                                                                                                                                                                              |        |
| Key results              | 18  | Summarise key results with reference to study objectives                                                                                                                                                     | 14     |
| Limitations              | 19  | Discuss limitations of the study, taking into account sources of potential bias or imprecision. Discuss both direction and magnitude of any potential bias                                                   | 14,15  |
| Interpretation           | 20  | Give a cautious overall interpretation of results considering objectives, limitations, multiplicity of analyses, results from similar studies, and other relevant evidence                                   | 15,16  |
| Generalisability         | 21  | Discuss the generalisability (external validity) of the study results                                                                                                                                        | 15,16  |
| <b>Other information</b> |     |                                                                                                                                                                                                              |        |
| Funding                  | 22  | Give the source of funding and the role of the funders for the present study and, if applicable, for the original study on which the present article is based                                                | 19     |

\*Give information separately for cases and controls in case-control studies and, if applicable, for exposed and unexposed groups in cohort and cross-sectional studies.

**Note:** An Explanation and Elaboration article discusses each checklist item and gives methodological background and published examples of transparent reporting. The STROBE checklist is best used in conjunction with this article (freely available on the Web sites of PLoS Medicine at <http://www.plosmedicine.org/>, Annals of Internal Medicine at <http://www.annals.org/>, and Epidemiology at <http://www.epidem.com/>). Information on the STROBE Initiative is available at [www.strobe-statement.org](http://www.strobe-statement.org).

# BMJ Open

**Associations between use of psychotropic medications and use of hormonal contraception among girls and women aged 15–49 years in Finland - a nationwide, register-based, matched case-control study**

|                                 |                                                                                                                                                                                                                                                                                                                                                                                                                                                               |
|---------------------------------|---------------------------------------------------------------------------------------------------------------------------------------------------------------------------------------------------------------------------------------------------------------------------------------------------------------------------------------------------------------------------------------------------------------------------------------------------------------|
| Journal:                        | <i>BMJ Open</i>                                                                                                                                                                                                                                                                                                                                                                                                                                               |
| Manuscript ID                   | bmjopen-2021-053837.R1                                                                                                                                                                                                                                                                                                                                                                                                                                        |
| Article Type:                   | Original research                                                                                                                                                                                                                                                                                                                                                                                                                                             |
| Date Submitted by the Author:   | 19-Nov-2021                                                                                                                                                                                                                                                                                                                                                                                                                                                   |
| Complete List of Authors:       | Toffol, Elena; University of Helsinki Faculty of Medicine, Department of Public Health<br>Partonen, Timo; Finnish Institute for Health and Welfare, Department of Public Health and welfare<br>Heikinheimo, Oskari; University of Helsinki Faculty of Medicine, Obstetrics and Gynaecology<br>But, Anna; University of Helsinki, Department of Public Health<br>Latvala, Antti; University of Helsinki<br>Haukka, Jari; University of Helsinki, Public Health |
| <b>Primary Subject Heading</b>: | Public health                                                                                                                                                                                                                                                                                                                                                                                                                                                 |
| Secondary Subject Heading:      | Epidemiology, Mental health, Obstetrics and gynaecology                                                                                                                                                                                                                                                                                                                                                                                                       |
| Keywords:                       | PSYCHIATRY, PUBLIC HEALTH, Reproductive medicine < GYNAECOLOGY                                                                                                                                                                                                                                                                                                                                                                                                |
|                                 |                                                                                                                                                                                                                                                                                                                                                                                                                                                               |

SCHOLARONE™  
Manuscripts





I, the Submitting Author has the right to grant and does grant on behalf of all authors of the Work (as defined in the below author licence), an exclusive licence and/or a non-exclusive licence for contributions from authors who are: i) UK Crown employees; ii) where BMJ has agreed a CC-BY licence shall apply, and/or iii) in accordance with the terms applicable for US Federal Government officers or employees acting as part of their official duties; on a worldwide, perpetual, irrevocable, royalty-free basis to BMJ Publishing Group Ltd ("BMJ") its licensees and where the relevant Journal is co-owned by BMJ to the co-owners of the Journal, to publish the Work in this journal and any other BMJ products and to exploit all rights, as set out in our [licence](#).

The Submitting Author accepts and understands that any supply made under these terms is made by BMJ to the Submitting Author unless you are acting as an employee on behalf of your employer or a postgraduate student of an affiliated institution which is paying any applicable article publishing charge ("APC") for Open Access articles. Where the Submitting Author wishes to make the Work available on an Open Access basis (and intends to pay the relevant APC), the terms of reuse of such Open Access shall be governed by a Creative Commons licence – details of these licences and which [Creative Commons](#) licence will apply to this Work are set out in our licence referred to above.

Other than as permitted in any relevant BMJ Author's Self Archiving Policies, I confirm this Work has not been accepted for publication elsewhere, is not being considered for publication elsewhere and does not duplicate material already published. I confirm all authors consent to publication of this Work and authorise the granting of this licence.

1  
2  
3 1 **Associations between use of psychotropic medications and use of hormonal contraception**  
4 **among girls and women aged 15–49 years in Finland - a nationwide, register-based, matched**  
5 2 **case-control study**  
6 3

8 4 Elena Toffol,<sup>1</sup> Timo Partonen,<sup>2</sup> Oskari Heikinheimo,<sup>3</sup> Anna But,<sup>1</sup> Antti Latvala,<sup>4</sup> Jari Haukka<sup>1,5</sup>  
9 5

11 6 <sup>1</sup> Department of Public Health, Clinicum, Faculty of Medicine, University of Helsinki, Helsinki,  
12 7 Finland

15 8 <sup>2</sup> Equality Unit, Department of Public Health and Welfare, Finnish Institute for Health and Welfare,  
16 9 Helsinki, Finland

18 10 <sup>3</sup> Department of Obstetrics and Gynecology, University of Helsinki and Helsinki University  
19 11 Hospital, Helsinki, Finland

22 12 <sup>4</sup> Institute of Criminology and Legal Policy, University of Helsinki, Helsinki, Finland

24 13 <sup>5</sup> Faculty of Medicine and Health Technology, Tampere University, Finland  
25 14  
26 15  
27 16  
28 17  
29 18  
30 19  
31 20  
32 21  
33 22

34 20 **Correspondence to:** Dr. Elena Toffol, Department of Public Health, Clinicum, University of  
35 21 Helsinki, Helsinki, Finland, elena.toffol@helsinki.fi  
36 22  
37 23  
38 24  
39 25  
40 26  
41 27  
42 28  
43 29  
44 30  
45 31  
46 32  
47 33  
48 34  
49 35  
50 36  
51 37  
52 38  
53 39  
54 40  
55 41  
56 42  
57 43  
58 44  
59 45  
60 46

46 27 **Word count:** 3726

## 1 **Abstract**

2 **Objectives.** The relationship between use of contraception and of psychiatric medications is  
3 understudied. We examined whether the current and past use of psychotropic medications is  
4 associated with the use and type of hormonal contraception (HC).

5 **Design.** Nationwide register-based matched case-control study.

6 **Settings.** All fertile-aged (15-49 years) girls and women living in Finland in 2017; data from several  
7 national registers.

8 **Participants.** 294,356 girls and women with a redeemed prescription of HC in 2017, and their same-  
9 sized control group of non-users (n=294,356) identified through the Prescription Centre.

10 **Main outcome measures.** Associations between the use of psychotropic medications and the use of  
11 HC, and the type of HC tested in logistic regression models.

12 **Results.** Altogether 19.5% of the HC users, and 18% of the HC non-users received at least one  
13 prescription for a psychotropic medication in 2017. Among HC users, the proportions of occasional  
14 and regular users of psychotropic medications in 2013–2016 were 4.5% and 14.8%, while among HC  
15 non-users the respective figures were 4.3% and 14.6%. In multivariable logistic regression models  
16 both use of psychotropic medications in 2017, and their occasional or regular use between 2013–2016  
17 were associated with higher odds of HC use, although with small to very small effect sizes (ORs  
18 between 1.37 and 1.06, 95% confidence intervals 1.22 to 1.53, and 1.03 to 1.09, respectively). After  
19 adjustment for covariates, when fixed combinations of progestogens and estrogens for systemic use  
20 was the reference category, women using almost any class of psychotropic medications had higher  
21 odds of using other types of HC.

22 **Conclusions.** Fertile-aged girls and women with current and past use of psychotropic medications  
23 have higher odds of using HC, with a specific pattern in the type of contraceptives used. Further  
24 research is warranted to examine whether our observations indicate a reduction of unwanted  
25 pregnancies in women with psychiatric disorders.

26  
27 **Keywords:** women, fertile-age, hormonal contraception, psychotropic medication.

## ARTICLE SUMMARY

### Strengths and limitations of this study

- The studied population is highly representative of all fertile-aged women in Finland.
- The combination of a cross-sectional and longitudinal retrospective design provides stability to psychiatric prescriptions as predictor of interest.
- Levels of use of psychotropic medications were determined through different approaches.
- Women suffering from and seeking help for their psychiatric disorders, and thus receiving a pharmacological treatment, represent a more conscious and healthy subgroup of this population.
- Misclassification of both psychiatric disorders and HC use as based on drug prescription cannot be ruled out; additionally, because of the observational nature of the data, causality cannot be determined in the associations identified.

## 1 INTRODUCTION

2 The relationship between the use of hormonal contraception (HC) and women's mental health  
3 continues to be debated.[1] While ample evidence has been provided showing no associations  
4 between the use of contraception and the increased risk of depressive or anxiety disorders,[1-3]  
5 findings from recent studies are challenging this view. Recent observations report that women using  
6 HC (especially oral contraceptives, OC) have higher odds of depression,[4] and of suicidal  
7 behavior,[5,6] with a long-term risk of depression later in adulthood for those who started their OC  
8 use during adolescence.[7]

9 However, while these findings indicate a link between contraceptive use and mental health status, the  
10 reverse association is likewise plausible and of public health and clinical relevance. Women suffering  
11 from psychiatric disorders seem to have higher risk of unplanned pregnancy and induced abortion, as  
12 well as risky sexual behavior including non-use or inconsistent use of contraception,[8-10] or use of  
13 less effective contraceptive methods.[11,12] For instance, among teenagers and young women, those  
14 with baseline depressive and stress symptoms had higher odds of reporting mood changes, of OC  
15 discontinuation, and of inconsistent use of contraception.[13,14] It has been hypothesized that a  
16 subgroup of women may be more sensitive to hormonal fluctuations, and thus more prone to develop  
17 mood symptoms or disorders in relation to reproductive events (e.g., the premenstrual phase, the  
18 postpartum, or the perimenopause),[15] as well as while on contraception.[16] Consequently, women  
19 with mental health problems, either because they are more likely to experience mood side effects of  
20 HC or to consider their perceived mood changes as caused by HC, are also more likely to discontinue  
21 contraception use. In line with these observations, we previously found that a recent care episode for  
22 a psychiatric disorder was associated with lower odds of HC use among almost 600,000 women aged  
23 15-49 years in Finland.[17] The study used register records with a psychiatric discharge diagnosis in  
24 2016, thus including only the most severe cases of psychiatric disorders. However, because mild and  
25 moderate mental disorders not requiring hospitalization are highly prevalent in the population, the  
26 overall relationship between mental health and HC use remains largely unknown. Thus, the aim of  
27 this study was to explore the associations between the current and previous prescriptions of  
28 psychotropic medications, and HC use in 2017, in a population inclusive of all fertile-aged women  
29 using HC in Finland, and their reference group of non-users. A further aim was to test whether the  
30 use of psychotropic medications was associated with the type of HC used.

## 31 METHODS

32 This work is part of a larger register-based study on HC in Finland, described in detail elsewhere.[17]  
33 Briefly, the population was selected on the basis of the unique personal identification number given  
34

1 at birth or at immigration to each person permanently residing in Finland. The group of HC users,  
2 selected from the Prescription Centre in the Kanta Services,[18] included all fertile-aged girls and  
3 women (15–49 years) with at least one redeemed prescription for HC in 2017 (n=294,445). The same-  
4 sized control group of HC non-users included women, matched by age and municipality of residence,  
5 with no redeemed HC prescriptions in 2017. Altogether 89 women who received a prescription with  
6 Anatomical Therapeutic Chemical (ATC) code “G03AD” (i.e., emergency contraception, which is  
7 usually available without prescription in Finland), and their matched controls, were excluded, leaving  
8 a final population of 588,712 women. As such, the study population included 52% of all fertile-aged  
9 girls and women living in Finland in 2017. The study was approved by the Ethics Committee of the  
10 Faculty of Medicine, University of Helsinki (3/2018). Because this is a register-based study, no  
11 individual consent is needed.

### 12 **The registers**

13 Information on redeemed medications for each person living in Finland is stored in the Prescription  
14 Centre, a centralized database in the Kanta Services. The recorded data include, among others, the  
15 product ATC code, date of prescription and of purchase, and the redeemed amount in defined daily  
16 dose (DDD). In addition to selection of the study population, the Prescription Centre was used to  
17 gather information on redeemed prescriptions for psychotropic medications between 2013 and 2017  
18 for all the study members. Use of psychotropic medications in 2017 was defined as one or more  
19 redeemed prescriptions in the same year. Users of psychotropic medications between 2013 and 2016  
20 were divided into occasional and regular users, defined as women with only one vs. two or more  
21 redeemed prescriptions of the same class drug.

22 The examined HC types included intrauterine device (IUD) with progestogen (i.e., the levonorgestrel-  
23 releasing intrauterine system, LNG-IUS, ATC code G02BA); vaginal ring with progestogen and  
24 estrogen (G02BB); progestogens and estrogens, fixed combinations – including monophasic  
25 combined OCs and transdermal patch (G03AA); progestogens and estrogens, sequential preparations  
26 for systemic use (G03AB); progestogens for systemic use (G03AC); and cyproterone and estrogen  
27 (G03HB01). Psychotropic medications included antipsychotics (N05A), anxiolytics (N05B),  
28 hypnotics/sedatives (N05C), antidepressants (N06A), psychostimulants (N06B), psycholeptics and  
29 psychoanaleptics in combination (N06C).

30 The Population Register Centre contains basic information of all Finnish citizens and foreign citizens  
31 residing permanently in Finland. From this register we obtained information on age, municipality of  
32 residence, civil status, socioeconomic group, highest level of education, and annual income of all the  
33 study members on 31 December 2017.

1  
2  
3 1 The Medical Birth Register includes data on all live births and stillbirths in Finland since 1987; the  
4  
5 2 Register of Induced Abortions contains data on induced abortions since 1983, and the Register of  
6  
7 3 Sterilizations on all sterilizations since 1987. Based on these registers, we gathered information on  
8  
9 4 pregnancies with birth dates in 2016 and 2017, induced abortions performed in 2016 and 2017, and  
10  
11 5 sterilizations between 1987 and 2016.

12 6 The Care Register of Health Care, which includes data on inpatient care in hospitals, health centers,  
13  
14 7 day surgeries and specialized outpatient care, was used to identify women who had received a  
15  
16 8 psychiatric diagnosis (International Classification of Diseases, 10th Revision codes F10–F19 -  
17  
18 9 substance abuse-, F30–F39 -mood disorders-, F40–F48 -anxiety disorders-, F50 -eating disorders-  
19  
20 10 and F60 -personality disorders-) between 2013 and 2016.

### 21 22 23 24 13 **Statistical analyses**

25  
26 14 The frequency of use of each class of psychotropic medications among HC users and non-users was  
27  
28 15 compared via chi-squared test. We assessed the percentages of women using each type of HC within  
29  
30 16 users of categories of psychotropic medications. Women with redeemed prescriptions of two or more  
31  
32 17 different types of HC in 2017 were classified on the basis of their first redeemed prescription.

33 18 Associations between use of each class of psychotropic medications and HC use were tested via  
34  
35 19 univariable (BL-Model 1) and multivariable binary logistic regression models using the “gnm” R-  
36  
37 20 package,[19] which, through the argument “eliminate”, allows for handling parameters of  
38  
39 21 stratification factors with a large number of levels (in our case, “municipality of residence”). Separate  
40  
41 22 models were conducted to test the associations with the use of psychotropic medications in 2017, and  
42  
43 23 with occasional or regular use from 2013 to 2016. Multivariable models were progressively adjusted  
44  
45 24 for age group, marital status and education level (BL-Model 2), socioeconomic status and income  
46  
47 25 level (BL-Model 3), and reproductive characteristics (pregnancies in 2017, induced abortions in  
48  
49 26 2016–2017, and sterilization before 2017) (BL-Model 4). A separate fully adjusted model further  
50  
51 27 tested the interaction between age and use of psychotropic medications; if there was a significant  
52  
53 28 interaction, age-stratified multivariable analyses were performed.

54  
55 29 To further confirm the results and take into account a potential “healthcare user bias”, sensitivity  
56  
57 30 analyses were conducted utilizing the purchased amount in DDD as indicator of use of psychiatric  
58  
59 31 medications between 2013 and 2016. To this end, the total purchased DDD for each class was divided  
60  
61 32 into tertiles, and groups of low, intermediate and high-level users were created accordingly. Because  
62  
63 33 of the data distribution with duplicate values, only two groups were created for high and low level

1  
2  
3 1 users of hypnotics/sedatives (cut off at the 50<sup>th</sup> percentile), and of psycholeptics and psychoanaleptics  
4  
5 2 in combination (cut off at the 60<sup>th</sup> percentile).

6 3 We further examined whether the odds of using distinct types of HC in 2017 differed by occasional  
7  
8 4 or regular use of psychotropic medications between 2013 and 2016. To this end, we conducted  
9  
10 5 univariable (ML-Model 1) and multivariable multinomial logistic regression models among HC  
11  
12 6 users, controlling for age, marital and socioeconomic status, education and income levels (ML-Model  
13  
14 7 2), and reproductive characteristics (pregnancies or induced abortions in 2016–2017) (ML-Model 3).  
15 8 Because of the relatively small number of women using psychostimulants or psycholeptics and  
16  
17 9 psychoanaleptics in combination, these classes were excluded from these analyses. Sensitivity  
18  
19 10 analyses were additionally performed utilizing groups of users based on the purchased DDD, as  
20  
21 11 described above.

22 12 For all the analyses, the two-tailed *p*-values of <0.05 were considered statistically significant. All the  
23  
24 13 analyses were performed with R software version 3.5.1.[20]

### 25 14 26 15 **Patient and public involvement**

27 16 Patients and the public were not directly involved in the research process.

### 28 17 29 18 **RESULTS**

30 19 A quarter (25.6%, n=294,356) of all fertile-aged girls and women in Finland were using HC in 2017.  
31 20 Their characteristics as well as those of the control women (n=294,356) are described in detail  
32 21 elsewhere.[17] The proportions of different utilized HC types are illustrated in Supplementary Figure  
33 22 1.

### 34 23 35 24 **Use of psychotropic medications in 2017**

36 25 Altogether 110,112 (18.7%) women had redeemed at least one prescription of a psychotropic  
37 26 medication in 2017; of them, 52% (n=57,478) used also HC. The proportions of women using and  
38 27 not using HC who also had one or more prescriptions of psychotropic medications by ATC codes are  
39 28 reported in Table 1.

40 29 In univariable logistic regression models the use of psychotropic medications in 2017 was associated  
41 30 with higher odds of HC use (ORs: any medication=1.12; anxiolytics=1.10; hypnotics/sedatives=1.17;  
42 31 antidepressants=1.11; psycholeptics and psychoanaleptics in combination=1.30, *p*<0.0001). The  
43 32 associations remained after controlling for age group, education and income levels, marital and  
44 33 socioeconomic status, and reproductive characteristics. Additionally, in partially and fully adjusted  
45  
46  
47  
48  
49  
50  
51  
52  
53  
54  
55  
56  
57  
58  
59  
60



1  
2  
3  
4  
5  
6  
7  
8  
9  
10  
11  
12  
13  
14  
15  
16  
17  
18  
19  
20  
21  
22  
23  
24  
25  
26  
27  
28  
29  
30  
31  
32  
33  
34  
35  
36  
37  
38  
39  
40  
41  
42  
43  
44  
45  
46  
47  
48  
49  
50  
51  
52  
53  
54  
55  
56  
57  
58  
59  
60

1 models, the use of antipsychotics was also associated with higher odds of being a HC user (ORs=1.10  
2 to 1.09,  $p<0.0001$ ) (Table 2).

3 There was a significant interaction between age and a recent prescription of psychotropic  
4 medications, except for psycholeptics and psychoanaleptics in combination. Regardless of the type  
5 of medication, the proportions of HC users among those with a recent psychotropic prescription were  
6 consistently higher especially in teenagers but lower in the young age group (20–24 years) as  
7 compared to non-users. Among those with a recent psychiatric prescription, the highest rates of using  
8 HC were seen for teenagers (varying from 54.6% for antipsychotics to 55.8% for antidepressants, and  
9 57.5% for anxiolytics and sedatives/hypnotics) (Supplementary Figures 2 and 3).

11 **Table 1. Proportions of HC users and non-users receiving one or more prescriptions for  
12 psychotropic medications in 2017.**

| Class of psychotropic medication<br>ATC code, class                        | HC users       | HC non-users   | <i>p</i> -value |
|----------------------------------------------------------------------------|----------------|----------------|-----------------|
| Any psychotropic medication                                                | 57,478 (19.5%) | 52,634 (17.9%) | <0.0001         |
| N05A, antipsychotics                                                       | 11,136 (3.8%)  | 11,688 (4.0%)  | 0.0002          |
| N05B, anxiolytics                                                          | 17,181 (5.8%)  | 15,744 (5.4%)  | <0.0001         |
| N05C, hypnotics/sedatives                                                  | 17,829 (6.1%)  | 15,397 (5.2%)  | <0.0001         |
| N06A, antidepressants                                                      | 40,488 (13.8%) | 37,028 (12.6%) | <0.0001         |
| N06B, psychostimulants                                                     | 1,681 (0.57%)  | 1,715 (0.58%)  | 0.570           |
| N06C, psycholeptics and psychoanaleptics<br>(amitriptyline) in combination | 1,237 (0.4%)   | 952 (0.3%)     | <0.0001         |

13 ATC, Anatomical Therapeutic Chemical; HC, hormonal contraception

**Table 2. Associations between prescriptions of psychotropic medications in 2017 and HC use in 2017.**

| Psychotropic medication.<br>ATC code, class | Model 1 |              |                 | Model 2 |              |                 | Model 3 |              |                 | Model 4 |              |                 |
|---------------------------------------------|---------|--------------|-----------------|---------|--------------|-----------------|---------|--------------|-----------------|---------|--------------|-----------------|
|                                             | OR      | 95% CI       | <i>p</i> -value |
| Any psychotropic medication                 | 1.12    | 1.10 to 1.13 | <0.0001         | 1.15    | 1.13 to 1.16 | <0.0001         | 1.16    | 1.14 to 1.17 | <0.0001         | 1.15    | 1.13 to 1.17 | <0.0001         |
| N05A, antipsychotics                        | 0.95    | 0.93 to 0.98 | 0.00019         | 1.02    | 0.99 to 1.05 | 0.212           | 1.10    | 1.07 to 1.13 | <0.0001         | 1.09    | 1.06 to 1.12 | <0.0001         |
| N05B, anxiolytics                           | 1.10    | 1.07 to 1.12 | <0.0001         | 1.14    | 1.12 to 1.17 | <0.0001         | 1.16    | 1.14 to 1.19 | <0.0001         | 1.16    | 1.14 to 1.19 | <0.0001         |
| N05C, hypnotics/<br>sedatives               | 1.17    | 1.14 to 1.20 | <0.0001         | 1.19    | 1.16 to 1.21 | <0.0001         | 1.18    | 1.15 to 1.20 | <0.0001         | 1.17    | 1.14 to 1.20 | <0.0001         |
| N06A, antidepressants                       | 1.11    | 1.09 to 1.13 | <0.0001         | 1.14    | 1.12 to 1.15 | <0.0001         | 1.16    | 1.14 to 1.17 | <0.0001         | 1.15    | 1.13 to 1.16 | <0.0001         |
| N06B, psychostimulants                      | 0.98    | 0.92 to 1.05 | 0.56            | 1.05    | 0.98 to 1.13 | 0.142           | 1.08    | 1.00 to 1.15 | 0.039           | 1.07    | 1.00 to 1.15 | 0.057           |
| N06C, psycholeptics and<br>psychoanaleptics | 1.30    | 1.20 to 1.42 | <0.0001         | 1.31    | 1.20 to 1.42 | <0.0001         | 1.27    | 1.17 to 1.39 | <0.0001         | 1.26    | 1.16 to 1.38 | <0.0001         |

Model 1 is the unadjusted model; Model 2 is Model 1 adjusted for age group, education and marital status; Model 3 is Model 2 adjusted for socioeconomic status and income level; Model 4 is Model 3 adjusted for recent pregnancy (in 2017), abortion (in 2016-2017) and sterilization (before 2017).

### Use of psychotropic medications between 2013 and 2016

A total of 112,609 women of our study population redeemed at least one prescription of a psychotropic medication between 2013 and 2016; of them, 20.8% (n=23,379) received a psychiatric diagnosis in the same period according to the records in the Care Register of Health Care; conversely, 18.5% (n=5,302) of the 28,681 women with a psychiatric diagnosis between 2013 and 2016 had not redeemed any psychiatric prescriptions.

Approximately 15% of the women (n=86,644) were regular users of psychotropic medications in the period 2013–2016, while 4.4% (n=25,965) received only one psychiatric prescription (Table 3, left side).

Higher odds for using HC were predicted by (occasional and regular) use of hypnotics/sedatives and psycholeptics and psychoanaleptics, and by regular use of antidepressants during 2013–2016 in unadjusted logistic regression models. On the contrary, occasional and regular use of antipsychotics and regular use of anxiolytics were associated with lower odds of HC use (Table 4). After adjustment for covariates occasional use of hypnotics/sedatives and psycholeptics and psychoanaleptics, and regular use of almost all the classes of psychiatric medications predicted belonging to the HC user group, although with small to very small effect sizes (ORs ranging between 1.06 and 1.37).

Sensitivity analyses using quantiles of redeemed DDD as indicator of psychotropic drug use (Table 3, right side) substantially confirmed these findings. Specifically, women with higher use (i.e., belonging to the highest levels of redeemed DDD) of all psychotropic medications had higher odds of using HC compared to women with no redeemed medications (i.e., with a DDD of zero for the respective drug class). Lower use of psychotropic medications was generally not associated with HC use (Supplementary Table 1).

There was a significant age\*psychotropic medication interaction in predicting HC use for all the medication classes ( $p \leq 0.0001$ ), with the exception of psycholeptics and psychoanaleptics. In detail, among occasional and regular users of psychotropic medications, the odds of HC use tended to be lower (than in non-users of psychotropic medications) in teenagers and young women (20–29 years), but higher in middle-age women (Supplementary Figures 4 and 5).

**Table 3. Proportions of HC users and non-users receiving one or more prescriptions of psychotropic medications between 2013 and 2016, as number of prescriptions (left side) or levels of use (based on quantiles of redeemed DDD) (right side).**

| Class of psychotropic medication | Number of prescriptions |                |                  |          | Level of use** |                  |                |         |
|----------------------------------|-------------------------|----------------|------------------|----------|----------------|------------------|----------------|---------|
|                                  | HC users                | HC non-users   | <i>p</i> -value* | HC users | HC non-users   | <i>p</i> -value* |                |         |
| Any psychotropic medication      |                         |                | 0.0001           |          |                |                  |                |         |
|                                  | one prescription        | 13,269 (4.5%)  | 12,696 (4.3%)    | 0.0008   | ---            | ---              |                |         |
|                                  | ≥ 2 prescriptions       | 43,572 (14.8%) | 43,072 (14.6%)   | 0.179    | ---            | ---              |                |         |
| Antipsychotics                   |                         |                | <0.0001          |          |                | <0.0001          |                |         |
|                                  | one prescription        | 3,867 (1.5%)   | 4,273 (1.3%)     | <0.0001  | Low            | 5,445 (1.85%)    | 5,709 (1.94%)  | 0.037   |
|                                  |                         |                |                  |          | Intermediate   | 4,385 (1.49%)    | 4,734 (1.61%)  | 0.0008  |
|                                  | ≥ 2 prescriptions       | 10,548 (3.6%)  | 11,694 (4.0%)    | <0.0001  | High           | 4,582 (1.56%)    | 5,519 (1.88%)  | <0.0001 |
| Anxiolytics                      |                         |                | 0.011            |          |                |                  | 0.0013         |         |
|                                  | one prescription        | 6,748 (2.3%)   | 6,564 (2.2%)     | 0.222    | Low            | 4,852 (1.65%)    | 4,650 (1.58%)  | 0.115   |
|                                  |                         |                |                  |          | Intermediate   | 4,503 (1.53%)    | 4,506 (1.53%)  | 2.924   |
|                                  | ≥ 2 prescriptions       | 6,705 (2.3%)   | 7,001 (2.4%)     | 0.023    | High           | 4,098 (1.39%)    | 4,409 (1.50%)  | 0.0022  |
| Hypnotics/sedatives              |                         |                | <0.0001          |          |                |                  | <0.0001        |         |
|                                  | one prescription        | 6,786 (2.3%)   | 6,072 (2.1%)     | <0.0001  | Low            | 6,865 (2.33%)    | 6,134 (2.08%)  | <0.0001 |
|                                  | ≥ 2 prescriptions       | 6,321 (2.2%)   | 5,493 (1.9%)     | <0.0001  | High           | 6,232 (2.12%)    | 5,407 (1.84%)  | <0.0001 |
| Antidepressants                  |                         |                | 0.053            |          |                |                  | 0.088          |         |
|                                  | one prescription        | 8,395 (2.9%)   | 8,460 (2.9%)     | 1.233    | Low            | 14,815 (2.52%)   | 14,867 (2.53%) | 2.288   |
|                                  |                         |                |                  |          | Intermediate   | 14,998 (2.55%)   | 14,689 (2.50%) | 0.219   |
|                                  | ≥ 2 prescriptions       | 36,396 (12.4%) | 35,793 (12.2%)   | 0.050    | High           | 14,978 (2.54%)   | 14,697 (2.50%) | 0.308   |
| Psychostimulants                 |                         |                | 0.11             |          |                |                  | 0.052          |         |
|                                  | one prescription        | 236 (0.08%)    | 276 (0.09%)      | 0.154    | Low            | 617 (0.21%)      | 702 (0.24%)    | 0.058   |

|                                                  |                   |              |              |         |              |             |             |         |
|--------------------------------------------------|-------------------|--------------|--------------|---------|--------------|-------------|-------------|---------|
|                                                  |                   |              |              |         | Intermediate | 563 (0.19%) | 612 (0.21%) | 0.459   |
|                                                  | ≥ 2 prescriptions | 1,604 (0.6%) | 1,669 (0.6%) | 0.512   | High         | 617 (0.21%) | 602 (0.21%) | 2.003   |
| Psycholeptics-psychoanaleptics<br>in combination |                   |              |              | <0.0001 |              |             |             | <0.0001 |
|                                                  | one prescription  | 809 (0.28%)  | 673 (0.23%)  | 0.0008  | Low          | 804 (0.27%) | 658 (0.22%) | 0.0003  |
|                                                  | ≥ 2 prescriptions | 697 (0.24%)  | 538 (0.18%)  | <0.0001 | High         | 702 (0.24%) | 553 (0.19%) | <0.0001 |

ATC, Anatomical Therapeutic Chemical; DDD, defined daily dose; HC, hormonal contraception.

\* *p*-values are from overall chi-square tests, and from post hoc pairwise comparisons adjusted for multiple testing

\*\* Level of use of psychotropic medications was based on quantiles of purchased DDD (tertiles for antipsychotics, anxiolytics, antidepressants and psychostimulants; 50<sup>th</sup> percentile for hypnotics/sedatives, and 60<sup>th</sup> percentile for psycholeptics and psychoanaleptics in combination).

**Table 4. Associations between number of prescriptions of psychotropic medications between 2013 and 2016, and HC use in 2017**

| Class of<br>psychotropic<br>medication | Number of<br>prescriptions | Model 1 |              |                 | Model 2 |              |                 | Model 3 |              |                 | Model 4 |              |                 |
|----------------------------------------|----------------------------|---------|--------------|-----------------|---------|--------------|-----------------|---------|--------------|-----------------|---------|--------------|-----------------|
|                                        |                            | OR      | 95% CI       | <i>p</i> -value |
| Any psychotropic<br>medication         | one prescription           | 1.05    | 1.02 to 1.08 | 0.0001          | 1.06    | 1.04 to 1.09 | <0.0001         | 1.04    | 1.01 to 1.06 | 0.0072          | 1.03    | 1.01 to 1.06 | 0.014           |
|                                        | ≥ 2 prescriptions          | 1.02    | 1.00 to 1.03 | 0.0295          | 1.04    | 1.03 to 1.06 | <0.0001         | 1.08    | 1.06 to 1.09 | <0.0001         | 1.07    | 1.06 to 1.09 | <0.0001         |
| Antipsychotics                         | one prescription           | 0.90    | 0.86 to 0.94 | <0.0001         | 0.95    | 0.91-1.00    | 0.0335          | 0.96    | 0.92 to 1.01 | 0.104           | 0.96    | 0.92 to 1.00 | 0.069           |
|                                        | ≥ 2 prescriptions          | 0.90    | 0.88 to 0.92 | <0.0001         | 0.97    | 0.94 to 1.00 | 0.0198          | 1.06    | 1.03 to 1.09 | 0.0001          | 1.06    | 1.03 to 1.09 | 0.0002          |
| Anxiolytics                            | one prescription           | 1.03    | 0.99 to 1.06 | 0.121           | 1.04    | 1.00 to 1.08 | 0.0295          | 1.04    | 1.01 to 1.08 | 0.0214          | 1.04    | 1.00 to 1.07 | 0.055           |
|                                        | ≥ 2 prescriptions          | 0.96    | 0.93 to 0.99 | 0.0117          | 1.02    | 0.98 to 1.05 | 0.309           | 1.10    | 1.06 to 1.14 | <0.0001         | 1.10    | 1.06 to 1.14 | <0.0001         |
| Hypnotics/<br>sedatives                | one prescription           | 1.12    | 1.09 to 1.16 | <0.0001         | 1.12    | 1.08 to 1.16 | <0.0001         | 1.09    | 1.05 to 1.13 | <0.0001         | 1.09    | 1.05 to 1.13 | <0.0001         |
|                                        | ≥ 2 prescriptions          | 1.16    | 1.12 to 1.20 | <0.0001         | 1.16    | 1.11 to 1.20 | <0.0001         | 1.18    | 1.14 to 1.23 | <0.0001         | 1.19    | 1.15 to 1.24 | <0.0001         |
| Antidepressants                        | one prescription           | 1.00    | 0.96 to 1.03 | 0.724           | 1.02    | 0.99 to 1.06 | 0.165           | 1.01    | 0.98 to 1.04 | 0.479           | 1.01    | 0.98 to 1.04 | 0.575           |
|                                        | ≥ 2 prescriptions          | 1.02    | 1.00 to 1.04 | 0.0178          | 1.04    | 1.03 to 1.06 | <0.0001         | 1.07    | 1.06 to 1.09 | <0.0001         | 1.07    | 1.06 to 1.09 | <0.0001         |
| Psychostimulants                       | one prescription           | 0.86    | 0.72 to 1.02 | 0.077           | 0.92    | 0.77 to 1.09 | 0.323           | 0.95    | 0.79 to 1.13 | 0.535           | 0.94    | 0.79 to 1.13 | 0.510           |

|                                    |                   |      |              |         |      |              |         |      |              |         |      |              |         |
|------------------------------------|-------------------|------|--------------|---------|------|--------------|---------|------|--------------|---------|------|--------------|---------|
|                                    | ≥ 2 prescriptions | 0.96 | 0.90 to 1.03 | 0.252   | 1.03 | 0.96 to 1.10 | 0.405   | 1.05 | 0.98 to 1.12 | 0.213   | 1.04 | 0.97 to 1.12 | 0.247   |
| Psycholeptics and psychoanaleptics | one prescription  | 1.20 | 1.09 to 1.33 | 0.0004  | 1.19 | 1.07 to 1.32 | 0.0012  | 1.17 | 1.06 to 1.30 | 0.0025  | 1.18 | 1.06 to 1.31 | 0.0024  |
|                                    | ≥ 2 prescriptions | 1.30 | 1.16 to 1.45 | <0.0001 | 1.31 | 1.17 to 1.47 | <0.0001 | 1.35 | 1.21 to 1.52 | <0.0001 | 1.37 | 1.22 to 1.53 | <0.0001 |

Model 1 is the unadjusted model; Model 2 is Model 1 adjusted for age group, education and marital status; Model 3 is Model 2 adjusted for socioeconomic status and income level; Model 4 is Model 3 adjusted for recent pregnancy (in 2017), abortion (in 2016-2017) and sterilization (before 2017). HC, hormonal contraception.

For peer review only

## 1 **Psychotropic medications and HC types**

2 Supplementary Figure 6 illustrates the types of HC used in 2017 by occasional and regular users of  
3 psychotropic medications between 2013 and 2016.

4 In univariable and multivariable (adjusted for age group, marital and socioeconomic status, education  
5 and income level, recent pregnancy or induced abortion) multinomial logistic regression models,  
6 when fixed combinations of progestogens and estrogens for systemic use (ATC: G03AA) was the  
7 reference category, women either occasionally (Figure 1) or regularly (Figure 2) using almost any  
8 class of psychotropic medications had higher odds of using any other types of HC (such as the LNG-  
9 IUS and, to a lesser extent, vaginal ring and progestogens for systemic use). The main exception was  
10 a reduced (or a tendency to reduced) relative risk ratio of use of sequential preparations for systemic  
11 use (G03AB) in regular users of anxiolytics and hypnotics/sedatives in a fully adjusted model. The  
12 results were substantially confirmed in unadjusted and, to a lesser extent, adjusted models using  
13 quantiles of redeemed DDD (Supplementary Table 2).

## 14 **DISCUSSION**

15 According to our results, the current as well as past uses of psychotropic medications are associated  
16 with higher odds of using HC among Finnish girls and women of fertile age. This association holds  
17 also in relation to regular and, although to a lesser extent, occasional use of psychiatric medications  
18 during the four previous years. This study additionally indicates that the use of psychotropic  
19 medications is associated with the type of contraceptive chosen.

20 Our study has a number of limitations. First, misclassification of HC use cannot be ruled out.  
21 Because we had no information on contraception use before 2017, it is possible that a number of  
22 women in the control group were in fact using HC, especially LARC methods, which may have been  
23 prescribed or inserted before 2017. The lack of information on HC use before 2017 further limits the  
24 interpretability of the detected prospective associations, which can in fact reflect a more complex path  
25 between (unidentified) HC use between 2013–2016, psychiatric problems in the same period, and HC  
26 use in 2017. It is also possible that the detected associations in fact result from a selection bias, where  
27 unobserved confounding may underlie the choice of using HC, especially in young women.  
28 Additionally, we lacked information on the use of contraceptives that do not require a prescription,  
29 such as copper IUD or condoms, or on young women who obtained free contraception as part of  
30 municipal programs. We may expect that a proportion of women with psychiatric disorders, being  
31 usually high utilizers of healthcare services, may have received free-of-charge (and thus without a  
32 prescription) contraception, and thus being erroneously classified as non-users. However, if this were  
33  
34

1 the case, it would even further support our results. Likewise, because more than 20% of women who  
2 receive free contraception opt for a LARC method such as the LNG-IUS or contraceptive  
3 implants,[21] the same bias may concern the analyses on the HC types.

4 Additionally our results cannot be generalized to women with psychiatric disorders. Because our  
5 predictor of interest was a prescription of psychotropic medications, women with mild conditions,  
6 who do not need a pharmacological treatment, as well as women with more severe disorders but not  
7 yet receiving (or with poor adherence to) a pharmacological treatment, may have been included in  
8 the reference group. However, by distinguishing regular vs. occasional past psychiatric prescriptions,  
9 and by conducting sensitivity analyses utilizing the amount of purchased drug, we partly took into  
10 account these factors. Similarly, it cannot be excluded that users of hormonal contraceptives prefer  
11 pharmacological treatment strategies for psychiatric disorders, whereas non-user of hormonal  
12 contraceptives with psychiatric diagnoses prefer non-pharmacological treatments such as  
13 psychotherapy.

14 P-values in the study are reported with descriptive purpose only, without intent to do formal statistical  
15 testing based on them; hence, no adjustments for multiple testing have been performed; however,  
16 results have been interpreted using estimates and their confidence intervals.

17 Moreover, given the observational nature of the data, causality cannot be determined in the  
18 associations identified.

19 Among the strengths of the study, our population was highly representative, including more than half  
20 of fertile-aged women in Finland. Additional strengths are the use of register data with proven good  
21 validity and reliability, and the combination of a cross-sectional and longitudinal retrospective design,  
22 which provides stability to our predictor of interest. Our findings are further supported by the use of  
23 different approaches to determine levels of use of psychotropic medications.

24  
25 To the best of our knowledge, this is the first study to examine, on a nationwide scale, the associations  
26 between the concurrent and past class-specific use of psychotropic medications and class-specific HC  
27 use. The observation of higher odds for HC use among girls and women using psychotropic  
28 medications contrasts with large part of the available evidence on psychiatric disorders.[1] In fact,  
29 previous studies reported associations between psychiatric disorders and risky sexual behavior, lower  
30 contraceptive compliance, contraceptive non-use, unintended pregnancy, and use of less effective  
31 methods.[9,11,12,22-29] However, other works showed either no relationships between  
32 depressive/anxiety symptoms or psychological distress and inconsistent use of contraception or use  
33 of less effective methods, or even higher odds of choosing a more effective method.[30-33]



1  
2  
3 1 On the other hand, our results are substantially in line with those of the few studies that have  
4 specifically looked at associations between HC and use of psychotropic medications, although from  
5 2 a different perspective. Two Swedish register-based studies have shown positive associations  
6 3 between some types of combined HCs and progestin-only HCs, and antidepressant use among women  
7 4 aged 16-31 years, with the highest odds in the youngest age group (16-19 years). In particular, the  
8 5 authors reported more pronounced associations with antidepressant use among young women using  
9 6 LARC methods (IUS, implants, injections and transdermal patch). However, because the studies did  
10 7 not take into account the sequence of drugs used, no assumption on the directionality of the  
11 8 associations could be made.[34,35] Another recent Swedish register-based study confirmed higher  
12 9 subsequent use of antidepressants in HC users, especially in contexts composed by immigrant, low-  
13 10 income women with previous mental issues.[36] The same authors had previously found an OR of  
14 11 1.34 for subsequent psychotropic drug use in young women (12-30 years) using HC compared to non-  
15 12 users, with the strongest association in adolescents (but no association after adolescence).[37] Again,  
16 13 because all these, including ours, are epidemiological studies based on observational data,  
17 14 assumptions on causality and directionality of the associations cannot be made.  
18 15  
19 16

20 17 Although not totally comparable, our findings, supported by the use of both a cross-sectional and a  
21 18 longitudinal design, suggest that girls and women with repeated prescriptions of psychotropic  
22 19 medications (and as such at least partly representative of those with a psychiatric disorder) have good  
23 20 access to, and are well aware of contraceptive options in Finland. The use of contraception was  
24 21 especially higher among teenagers who used psychiatric medications than in their peers who were  
25 22 not using the same drugs. However, it tended to invert the figure for the young age group (20–24  
26 23 years), possibly suggesting that the adequate psychiatric and reproductive counselling and education  
27 24 likely offered through the school system may not be completely continued after high school.

28 25 The observation of a relationship between the use of psychotropic drugs and the type of contraceptive  
29 26 chosen provides additional information on the reproductive health status of these women.  
30 27 Specifically, the use of psychiatric medications was associated with higher odds of using types of  
31 28 contraception other than the monophasic OCs, and especially long-acting reversible contraception  
32 29 (LARC) methods such as the LNG-IUS, as well as vaginal ring and progestogens for systemic use  
33 30 including implants. Because the oral preparations in particular require daily motivation, the use of  
34 31 less user-dependent LARC methods may be advisable especially in women who, because of their  
35 32 psychological challenges, may have difficulty with a method necessitating daily remembering. This  
36 33 is in line with the observation of lower odds of using sequential preparations (highly user-dependent)  
37 34 in regular users of anxiolytics and hypnotics/sedatives.

1  
2  
3 1  
4  
5 2 It could be argued that our findings may be affected by a healthcare user bias. In other words, it is  
6 3 likely that women suffering from and seeking help for their psychiatric disorders, and thus receiving  
7 4 a pharmacological treatment, represent a more conscious and healthy subgroup of this population. As  
8 5 such, they may obtain a better control of their symptoms (as compared to their peers not using  
9 6 psychiatric medications), and thus also of other areas of their lives, including contraception.  
10 7 Moreover, because more likely to visit healthcare services, they may also be more likely to receive  
11 8 and adhere to any medical prescription. Reciprocally, women who use HC are likely to see healthcare  
12 9 providers, and thus to have their psychiatric symptoms diagnosed and pharmacologically treated. This  
13 10 assumption is supported by the observation that the detected associations were substantially  
14 11 consistent for women with either repeated prescriptions or belonging to the highest DDD group, but  
15 12 almost completely non-existent for occasional users or those with the lowest purchased DDD.  
16 13 However, in our sensitivity analyses part of the associations hold also in the group of women with  
17 14 intermediate/low use (e.g., in the case of hypnotic/sedatives, antidepressants, psycholeptics and  
18 15 psychoanaleptics) possibly including, in addition to occasional users, those with poor compliance to  
19 16 psychopharmacological treatment.

20 17  
21 18 Taken together, our results indicate that girls and women of fertile age who use psychiatric  
22 19 medications have access to and use adequate contraceptive options, suggesting effectiveness of the  
23 20 reproductive and public health strategies and policies implemented to date in Finland. However,  
24 21 because users of psychiatric medications plausibly represent only a subgroup of those with psychiatric  
25 22 disorders, the need for still reaching the entire psychiatric population and satisfy their needs for birth  
26 23 control should be addressed in further studies.

27 24  
28 25 In summary, fertile-aged girls and women using psychiatric medications have higher odds of using  
29 26 HC in Finland, with a specific pattern in the type of contraceptives used. Whether our observation of  
30 27 adequate use of effective contraception among girls and women using psychotropic medications  
31 28 translates into an actual reduction in the number of unwanted pregnancies, and thus of induced  
32 29 abortions, in women with psychiatric disorders, it remains to be examined.

### 30 31 31 32 **CONTRIBUTORSHIP STATEMENT**

32 33 ET, AB, OH, AL, TP and JH contributed to the study planning and design, interpretation of the data,  
33 34 and critical revision of the manuscript. ET and JH verified the data. ET and JH had full access to all

1  
2  
3 1 the data and performed statistical analyses. ET wrote the first draft of the manuscript. ET, AB, OH,  
4 AL, TP and JH approved the submitted version of the manuscript and accepted responsibility to  
5 2 submit for publication. ET and JH are the guarantors.  
6 3  
7 4  
8 5

## 10 5 **FUNDING**

11 6 This work was supported by the Jane and Aatos Erkko Foundation (JH; grant number 170062), the  
12 7 Avohoidon tutkimussäätiö (JH; Foundation for Primary Care Research) and the the Yrjö Jahnssoon  
13 8 Foundation (ET; grant number 20207328).  
14 9  
15 10

## 18 10 **COMPETING INTERESTS**

19 11 OH reports a research grant from the Jane and Aatos Erkko Foundation during the conduct of the  
20 12 study; personal fees from Bayer Health Care AG, personal fees from Gedeon-Richter outside the  
21 13 submitted work; OH serves as president for the Finnish Gynecological Society and for the Nordic  
22 14 Federation of the Societies of Obstetrics and Gynecology, and is the chairperson for the Finnish  
23 15 national guideline committee on induced abortion care. The other authors report no conflicts of  
24 16 interest.  
25 17  
26 18  
27 19  
28 20  
29 21  
30 22  
31 23

## 32 17 **PATIENT CONSENT FOR PUBLICATION**

33 18 Not required.  
34 19  
35 20  
36 21  
37 22

## 38 19 **ETHICS APPROVAL STATEMENT**

39 20 The study was approved by the Ethics Committee of the Faculty of Medicine, University of Helsinki  
40 21 (3/2018).  
41 22  
42 23  
43 24  
44 25  
45 26

## 46 23 **DATA SHARING**

47 24 The data that support the findings of this study are available from Statistics Finland, the Finnish  
48 25 Institute for Health and Welfare, and the Social Insurance Institution, but restrictions apply to the  
49 26 availability of these data, which were used under license for the current study, and so are not publicly  
50 27 available. Data are, however, available from the authors upon reasonable request and with permission  
51 28 of FinData (<https://www.findata.fi/en/>).  
52 29  
53 30  
54 31  
55 32  
56 33  
57 34  
58 35  
59 36  
60 37

## 58 31 **References**

- 1 1. McCloskey LR, Wisner KL, Cattan MK, et al. Contraception for women with psychiatric disorders.  
2 *Am J Psychiatry* 2021;178:247–55. doi:10.1176/appi.ajp.2020.20020154.
- 3 2. Duke JM, Sibbritt DW, Young AF. Is there an association between the use of oral contraception  
4 and depressive symptoms in young Australian women? *Contraception* 2007;75:27–31.  
5 doi:10.1016/j.contraception.2006.08.002.
- 6 3. Cheslack-Postava K, Keyes KM, Lowe SR, et al. Oral contraceptive use and psychiatric disorders  
7 in a nationally representative sample of women. *Arch Womens Ment Health* 2015;18:103–11.  
8 doi:10.1007/s00737-014-0453-4.
- 9 4. Skovlund CW, Mørch LS, Kessing LV, et al. Association of hormonal contraception with  
10 depression. *JAMA Psychiatry* 2016;73:1154–62. doi:10.1001/jamapsychiatry.2016.2387.
- 11 5. Skovlund CW, Mørch LS, Kessing LV, et al. Association of hormonal contraception with suicide  
12 attempts and suicides. *Am J Psychiatry* 2018;175:336–42. doi:10.1176/appi.ajp.2017.17060616.
- 13 6. Edwards A, Lönn S, Crump C, et al. Oral contraceptive use and risk of suicidal behavior among  
14 young women. *Psychol Med* 2020;1–8. doi:10.1017/S0033291720003475.
- 15 7. Anderl C, Li G, Chen FS. Oral contraceptive use in adolescence predicts lasting vulnerability to  
16 depression in adulthood. *J Child Psychol Psychiatr* 2020;61:148–56. doi:10.1111/jcpp.13115.
- 17 8. Ramrakha S, Caspi A, Dickson N, et al. Psychiatric disorders and risky sexual behaviour in young  
18 adulthood: cross sectional study in birth cohort *BMJ* 2000;321:263. doi:10.1136/bmj.321.7256.263.
- 19 9. Zink TM, Shireman TI, Ho M, et al. High-risk teen compliance with prescription contraception: an  
20 analysis of Ohio Medicaid claims. *J Pediatr Adolesc Gynecol* 2002;15:15–21. doi:10.1016/S1083-  
21 3188(01)00134-6.
- 22 10. Walsemann KM, Perez AD. Anxiety's relationship to inconsistent use of oral contraceptives.  
23 *Health Educ Behav* 2006;33:197–214. doi:10.1177/1090198105277322.
- 24 11. Garbers S, Correa N, Tobier N, et al. Association between symptoms of depression and  
25 contraceptive method choices among low-income women at urban reproductive health centers.  
26 *Matern Child Health J* 2010;14:102. doi:10.1007/s10995-008-0437-y.
- 27 12. Vafai Y, Steinberg JR. The effects of preabortion depressive symptoms on postabortion  
28 contraceptive effectiveness level chosen among women seeking abortions. *Contraception*  
29 2018;97:335–40. doi:10.1016/j.contraception.2017.12.013.
- 30 13. Hall KS, O'Connell WK, Rickert VI, et al. Influence of depressed mood and psychological stress  
31 symptoms on perceived oral contraceptive side effects and discontinuation in young minority women.  
32 *Contraception* 2012;86:518–25. doi:10.1016/j.contraception.2012.04.010.
- 33 14. Hall KS, Moreau C, Trussell J, et al. Young women's consistency of contraceptive use — does  
34 depression or stress matter? *Contraception* 2013;88:641–9. doi:10.1016/j.contraception.2013.06.003.

1  
2  
3  
4  
5  
6  
7  
8  
9  
10  
11  
12  
13  
14  
15  
16  
17  
18  
19  
20  
21  
22  
23  
24  
25  
26  
27  
28  
29  
30  
31  
32  
33  
34  
35  
36  
37  
38  
39  
40  
41  
42  
43  
44  
45  
46  
47  
48  
49  
50  
51  
52  
53  
54  
55  
56  
57  
58  
59  
60

15. Pope CJ, Oinonen K, Mazmanian D, et al. The hormonal sensitivity hypothesis: A review and new findings. *Med Hypotheses* 2017;102:69–77. doi:10.1016/j.mehy.2017.03.012.
16. Bengtsdotter H, Lundin C, Gemzell Danielsson K, et al. Ongoing or previous mental disorders predispose to adverse mood reporting during combined oral contraceptive use. *Eur J Contracept Reprod Health Care* 2018;23:45–51. doi:10.1080/13625187.2017.1422239.
17. Toffol E, But A, Heikinheimo O, et al. Associations between hormonal contraception use, sociodemographic factors and mental health: a nationwide, register-based, matched case–control study. *BMJ Open* 2020;10:e040072. doi:10.1136/bmjopen-2020-040072.
18. Kanta Services. What are the Kanta services? Available: <https://www.kanta.fi/en/what-are-kanta-services> [Accessed 24 Mar 2021].
19. Turner H, Firth D. Generalized nonlinear models in R: an overview of the gnm package. R package version 1.1-1, 2020. Available: <https://CRAN.R-project.org/package=gnm> [Accessed 24 Mar 2021].
20. R Core Team. R: A Language and Environment for Statistical Computing [Internet]. Vienna, Austria: R Foundation for Statistical Computing, 2019. Available from: <https://www.R-project.org/>
21. Gyllenberg F, Saloranta T, But A, et al. Predictors of choosing long-acting reversible contraceptive methods when provided free-of-charge - A prospective cohort study in Finland. *Contraception* 2020;101:370–5. doi:10.1016/j.contraception.2020.01.018.
22. Tubman JG, Gil AG, Wagner EF, et al. Patterns of sexual risk behaviors and psychiatric disorders in a community sample of young adults. *J Behav Med* 2003;26:473–500. doi:10.1023/A:1025776102574.
23. Brown A, Yung A, Cosgrave E, et al. Depressed mood as a risk factor for unprotected sex in young people. *Australas Psychiatry* 2006;14:310–2. doi:10.1080/j.1440-1665.2006.02291.x.
24. DiClemente RJ, Wingood GM, Crosby RA, et al. A prospective study of psychological distress and sexual risk behavior among black adolescent females. *Pediatrics* 2001;108:e85. doi:10.1542/peds.108.5.e85.
25. Lehrer JA, Shrier LA, Gortmaker S, et al. Depressive symptoms as a longitudinal predictor of sexual risk behaviors among US middle and high school students. *Pediatrics* 2006;118:189–200. doi:10.1542/peds.2005-1320.
26. Hall KS, Moreau C, Trussell J, et al. Role of young women's depression and stress symptoms in their weekly use and nonuse of contraceptive methods. *J Adolesc Health* 2013;53:241–8. doi:10.1016/j.jadohealth.2013.02.009.
27. Hall KS, Kusunoki Y, Gatny H, et al. The risk of unintended pregnancy among young women with mental health symptoms. *Soc Sci Med* 2014;100:62–71. doi:10.1016/j.socscimed.2013.10.037.

- 1  
2  
3 1 28. Berenson AB, Breitkopf CR, Wu ZH. Reproductive correlates of depressive symptoms among  
4 2 low-income minority women. *Obstet Gynecol* 2003;102:1310–7.  
5 3 doi:10.1016/j.obstetgynecol.2003.08.012.  
6 4  
7 29. Bello JK, Salas J, Meyer D, et al. Mental health diagnoses and early removal of long-acting  
8 5 reversible contraception. *J Affect Disord* 2020;262:333–6. doi:10.1016/j.jad.2019.11.046.  
9 6  
10 30. Steinberg JR, Tschann JM, Henderson JT, et al. Psychological distress and post-abortion  
11 7 contraceptive method effectiveness level chosen at an urban clinic. *Contraception* 2013;88:717–24.  
12 8 doi:10.1016/j.contraception.2013.08.009.  
13 9  
14 31. Francis J, Presser L, Malbon K, et al. An exploratory analysis of contraceptive method choice and  
15 10 symptoms of depression in adolescent females initiating prescription contraception. *Contraception*  
16 11 2015;91:336–43. doi:10.1016/j.contraception.2014.12.010.  
17 12  
18 32. Faisal-Cury A, Rossi Menezes P, Huang H. The relationship between perinatal psychiatric  
19 13 disorders and contraception use among postpartum women. *Contraception* 2013;88:498–502.  
20 14 doi:10.1016/j.contraception.2013.02.003.  
21 15  
22 33. Nelson DB, Zhao H, Corrado R, et al. Preventing unintended pregnancy among young sexually  
23 16 active women: recognizing the role of violence, self-esteem, and depressive symptoms on use of  
24 17 contraception. *J Womens Health* 2017;26:352–60. doi:10.1089/jwh.2016.5753.  
25 18  
26 34. Wiréhn AB, Foldemo A, Josefsson A, Lindberg M. Use of hormonal contraceptives in relation to  
27 19 antidepressant therapy: A nationwide population-based study. *Eur J Contracept Reprod Health Care*  
28 20 2010;15:41–7. doi: 10.3109/13625181003587004.  
29 21  
30 35. Lindberg M, Foldemo A, Josefsson A, Wiréhn AB. Differences in prescription rates and odds  
31 22 ratios of antidepressant drugs in relation to individual hormonal contraceptives: a nationwide  
32 23 population-based study with age-specific analyses. *Eur J Contracept Reprod Health Care*  
33 24 2012;17:106–18. doi: 10.3109/13625187.2012.658925.  
34 25  
35 36. Zettermark S, Khalaf K, Perez-Vicente R, Leckie G, Mulinari D, Merlo J. Population  
36 26 heterogeneity in associations between hormonal contraception and antidepressant use in Sweden: a  
37 27 prospective cohort study applying intersectional multilevel analysis of individual heterogeneity and  
38 28 discriminatory accuracy (MAIHDA). *BMJ Open* 2021;11:e049553. doi: 10.1136/bmjopen-2021-  
39 29 049553.  
40 30  
41 37. Zettermark S, Perez Vicente R, Merlo J. Hormonal contraception increases the risk of  
42 31 psychotropic drug use in adolescent girls but not in adults: a pharmacoepidemiological study on 800  
43 32 000 Swedish women. *PLoS One* 2018;13:e0194773.  
44 33  
45  
46  
47  
48  
49  
50  
51  
52  
53  
54  
55  
56  
57  
58  
59  
60

**Figure 1. Associations between occasional use of psychotropic medications (one prescription) between 2013 and 2016, and type of hormonal contraceptives used in 2017.** Panel A: antipsychotics; Panel B: anxiolytics; Panel C: hypnotics/sedatives; Panel D: antidepressants. Results are from multinomial logistic regression models among HC users. Model 1 is the unadjusted model; Model 2 is Model 1 adjusted for age, marital and socioeconomic status, education and income level; Model 3 is Model 2 adjusted for abortion and pregnancy in 2016-2017. Reference category: G03AA, progestogens and estrogens, fixed combinations for systemic use –including monophasic combined oral contraceptives and transdermal patch. G02BA: intrauterine device with progestogen; G02BB: vaginal ring with progestogen and estrogen; G03AB: progestogens and estrogens, sequential preparations for systemic use; G03AC: progestogens for systemic use; G03HB01: cyproterone and estrogen.

**Figure 2. Associations between regular use of psychotropic medications (two or more prescriptions) between 2013 and 2016, and type of hormonal contraceptives used in 2017.** Panel A: antipsychotics; Panel B: anxiolytics; Panel C: hypnotics/sedatives; Panel D: antidepressants. Results are from multinomial logistic regression models among HC users. Model 1 is the unadjusted model; Model 2 is Model 1 adjusted for age, marital and socioeconomic status, education and income level; Model 3 is Model 2 adjusted for abortion and pregnancy in 2016-2017. Reference category: G03AA, progestogens and estrogens, fixed combinations for systemic use –including monophasic combined oral contraceptives and transdermal patch. G02BA: intrauterine device with progestogen; G02BB: vaginal ring with progestogen and estrogen; G03AB: progestogens and estrogens, sequential preparations for systemic use; G03AC: progestogens for systemic use; G03HB01: cyproterone and estrogen.

**Supplementary Figure 1. Proportions of different types of HC used in Finland in 2017.**

**Supplementary Figure 2. Associations between one or more prescriptions of psychotropic medications and use of hormonal contraception in 2017, stratified by age group.**

**Supplementary Figure 3. Proportions of HC use among women using and not using different classes of psychotropic medications in 2017, by age group.**

**Supplementary Figure 4. Associations between occasional (one prescription) or regular (two or more prescriptions) use of psychotropic medications between 2013 and 2016, and hormonal contraception use in 2017, stratified by age group.**

**Supplementary Figure 5. Proportions of HC use in 2017 among women with no, occasional (one prescription) and regular (two or more prescriptions) use of psychotropic medications between 2013 and 2016.**

1  
2  
3 **Supplementary Figure 6. Proportions of types of hormonal contraceptives used in 2017 by**  
4 **women with occasional (one prescription) and regular (two or more prescriptions) use of**  
5 **psychotropic medications between 2013 and 2016.**  
6  
7  
8  
9  
10  
11  
12  
13  
14  
15  
16  
17  
18  
19  
20  
21  
22  
23  
24  
25  
26  
27  
28  
29  
30  
31  
32  
33  
34  
35  
36  
37  
38  
39  
40  
41  
42  
43  
44  
45  
46  
47  
48  
49  
50  
51  
52  
53  
54  
55  
56  
57  
58  
59  
60

For peer review only



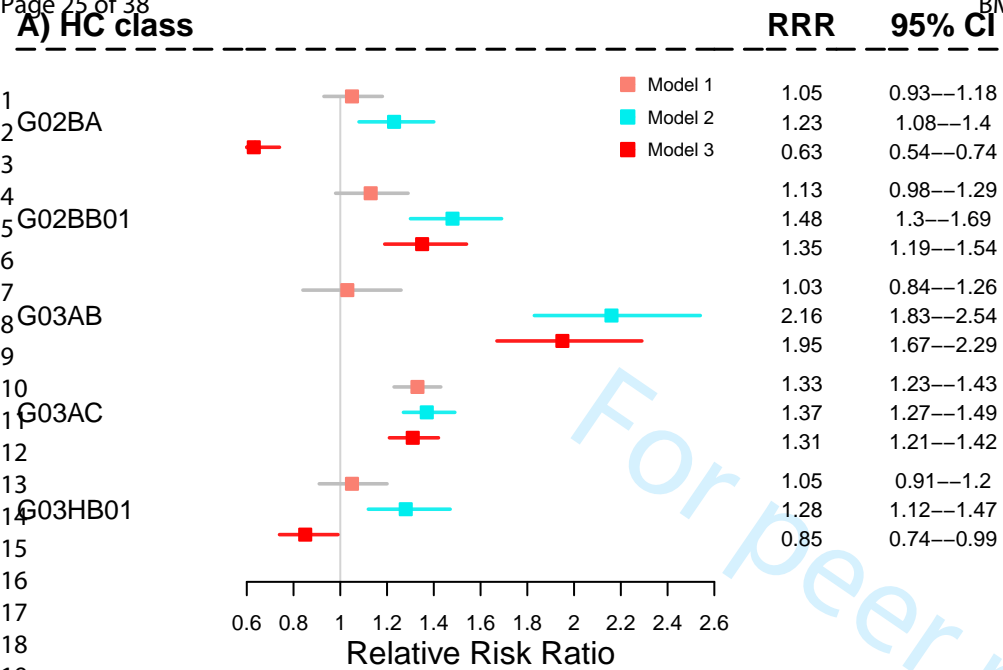

For peer review only

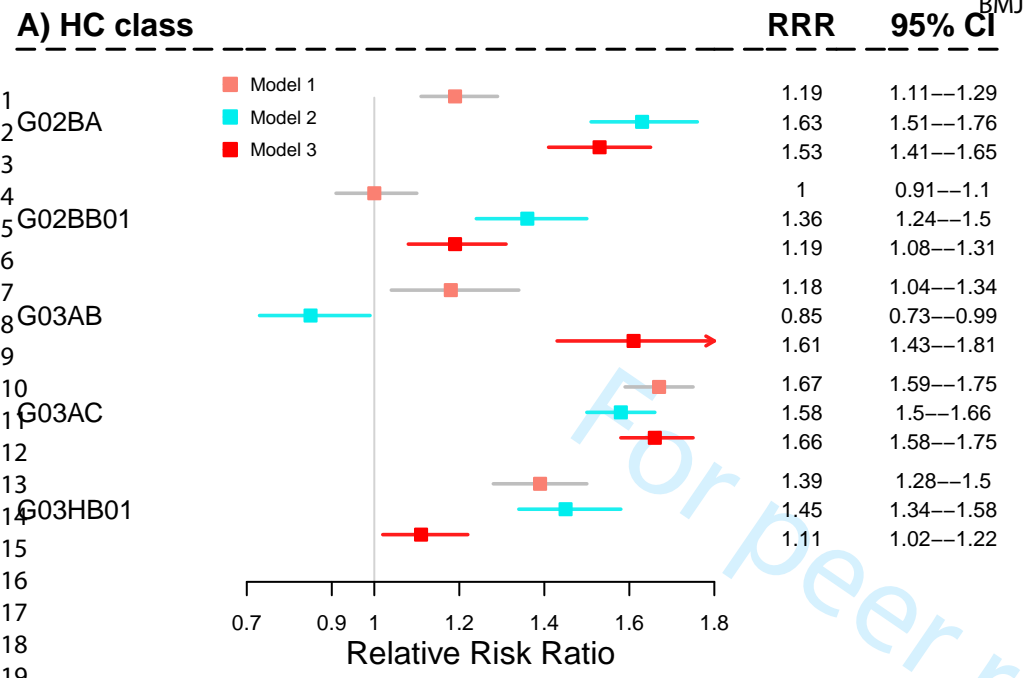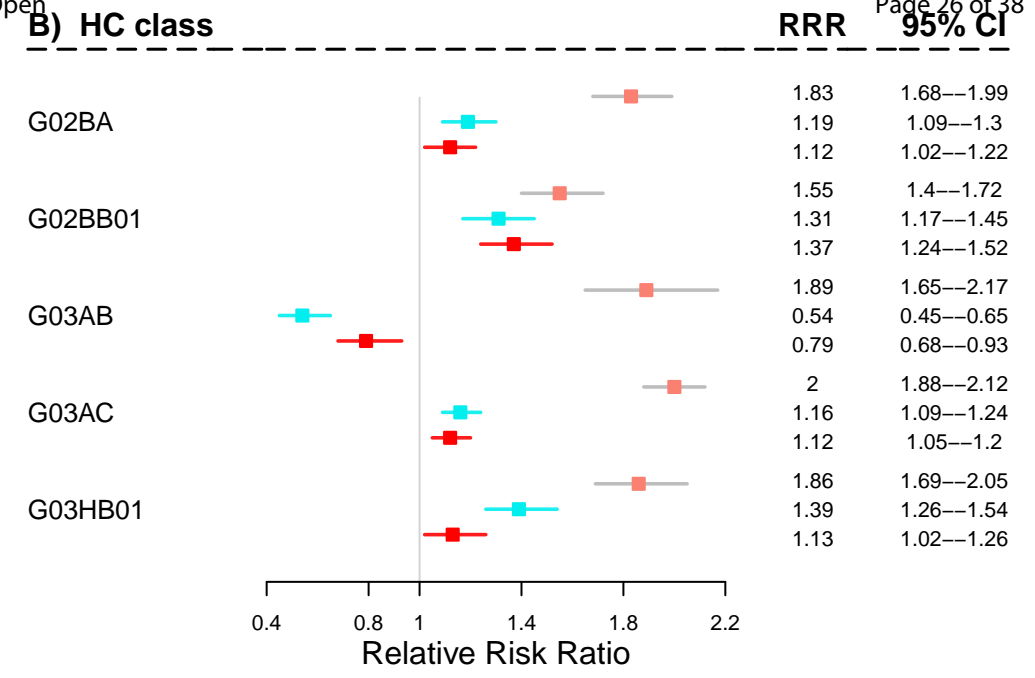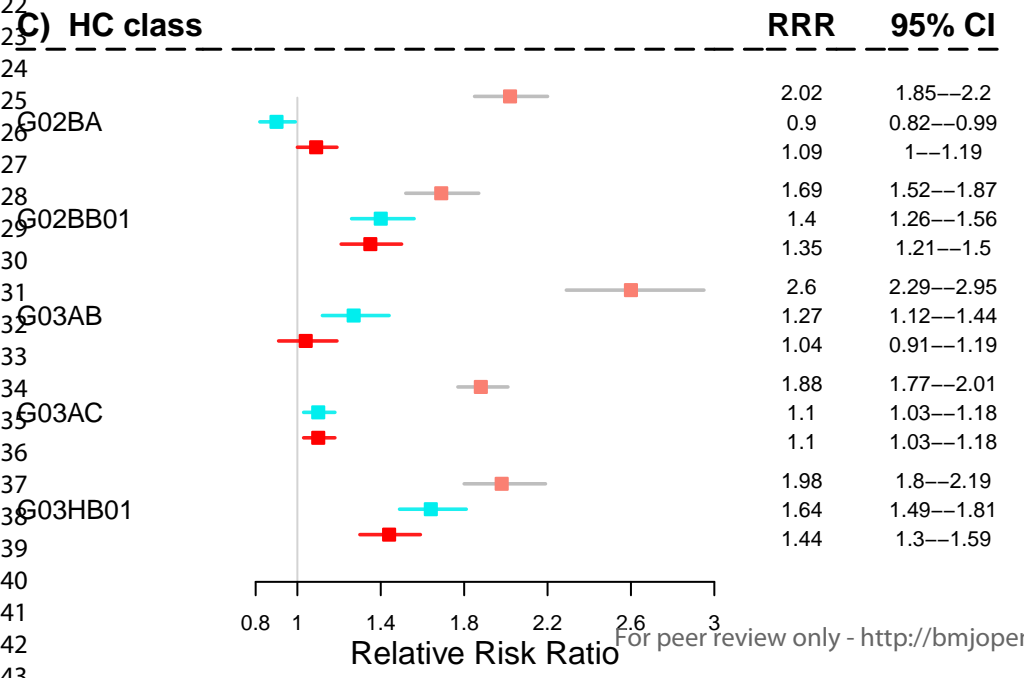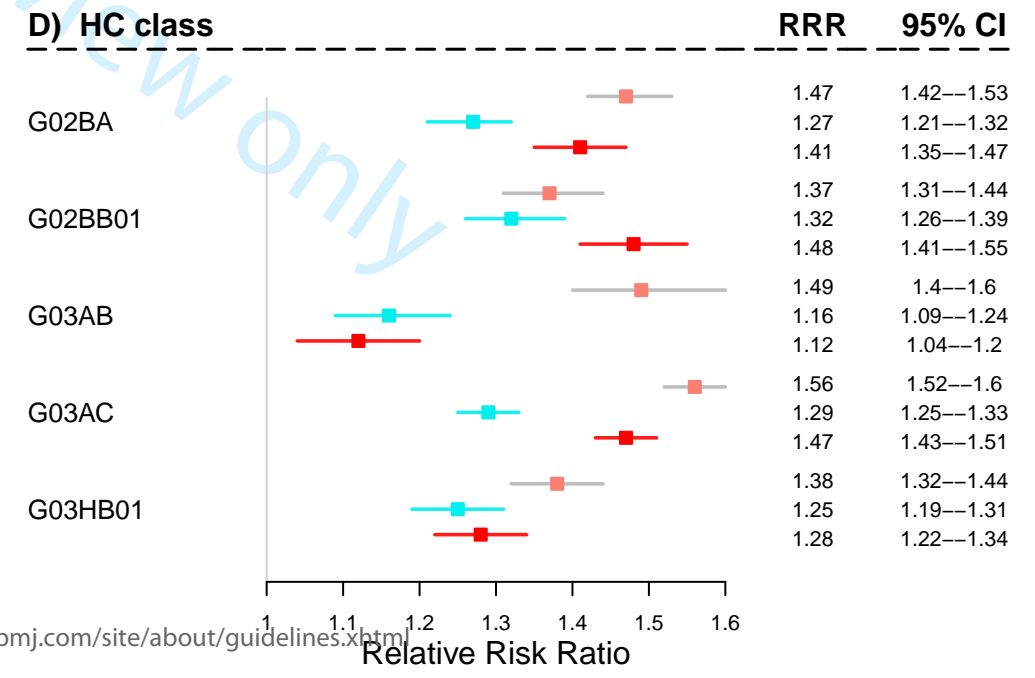

1  
2  
3  
4  
5  
6  
7  
8  
9  
10  
11  
12  
13  
14  
15  
16  
17  
18  
19  
20  
21  
22  
23  
24  
25  
26  
27  
28  
29  
30  
31  
32  
33  
34  
35  
36  
37  
38  
39  
40  
41  
42  
43  
44

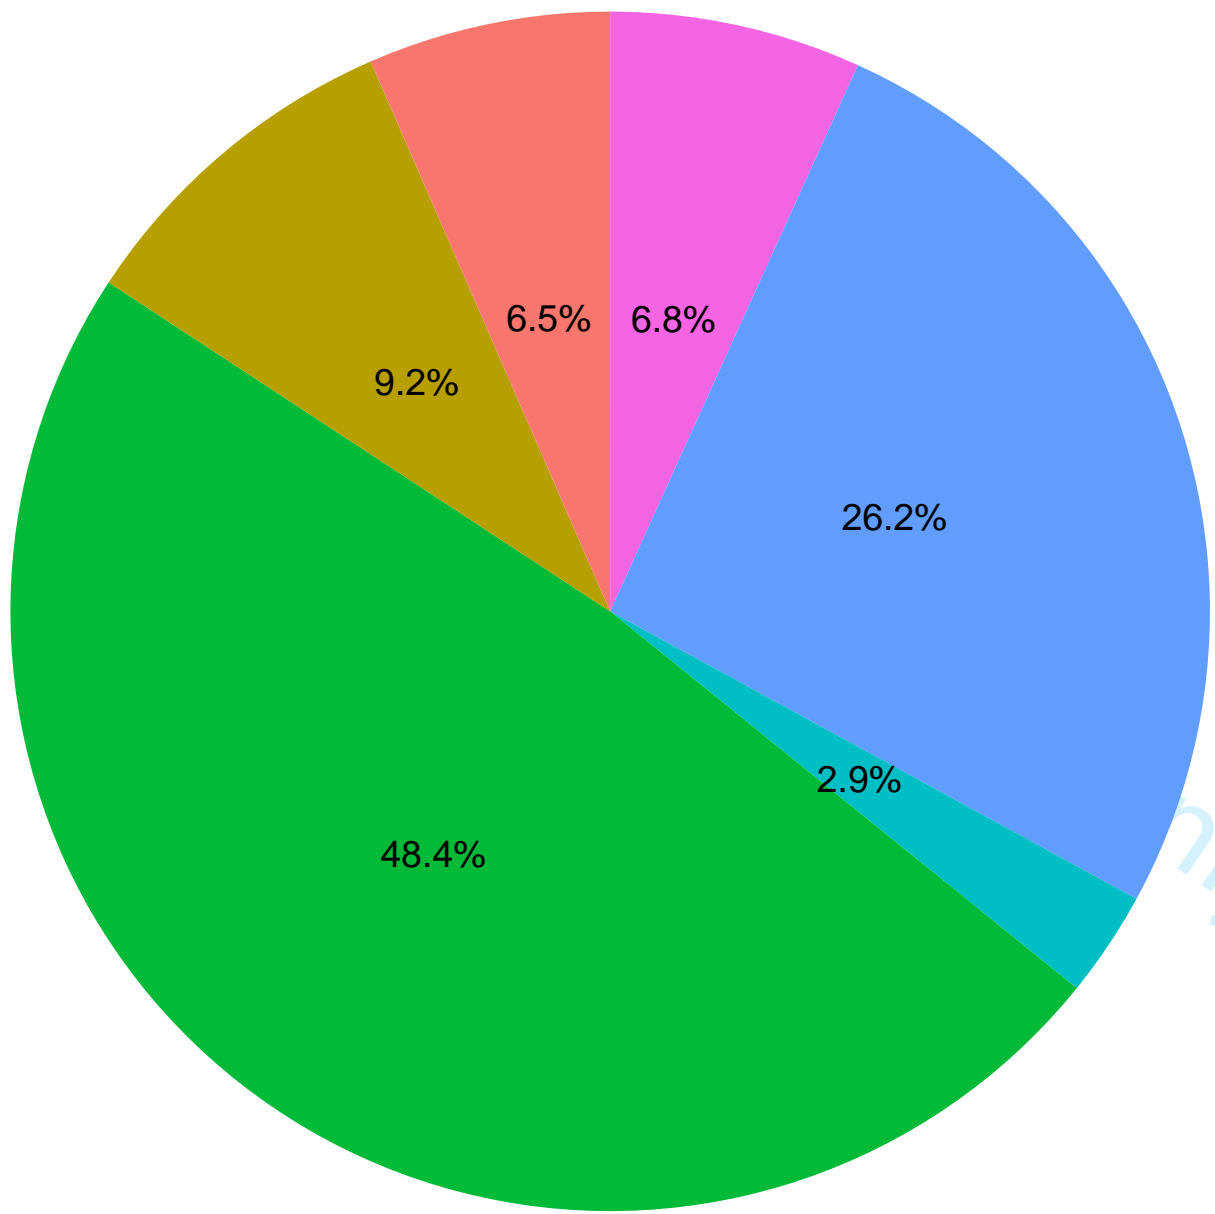

**Types of HC**

- Vaginal ring with progestogen and estrogen
- IUD with progestogen
- Progestogens and estrogens, fixed combinations
- Progestogens and estrogens, sequential preparations
- Progestogens (systemic use)
- Cyproterone and estrogen

Age group

OR

95% CI

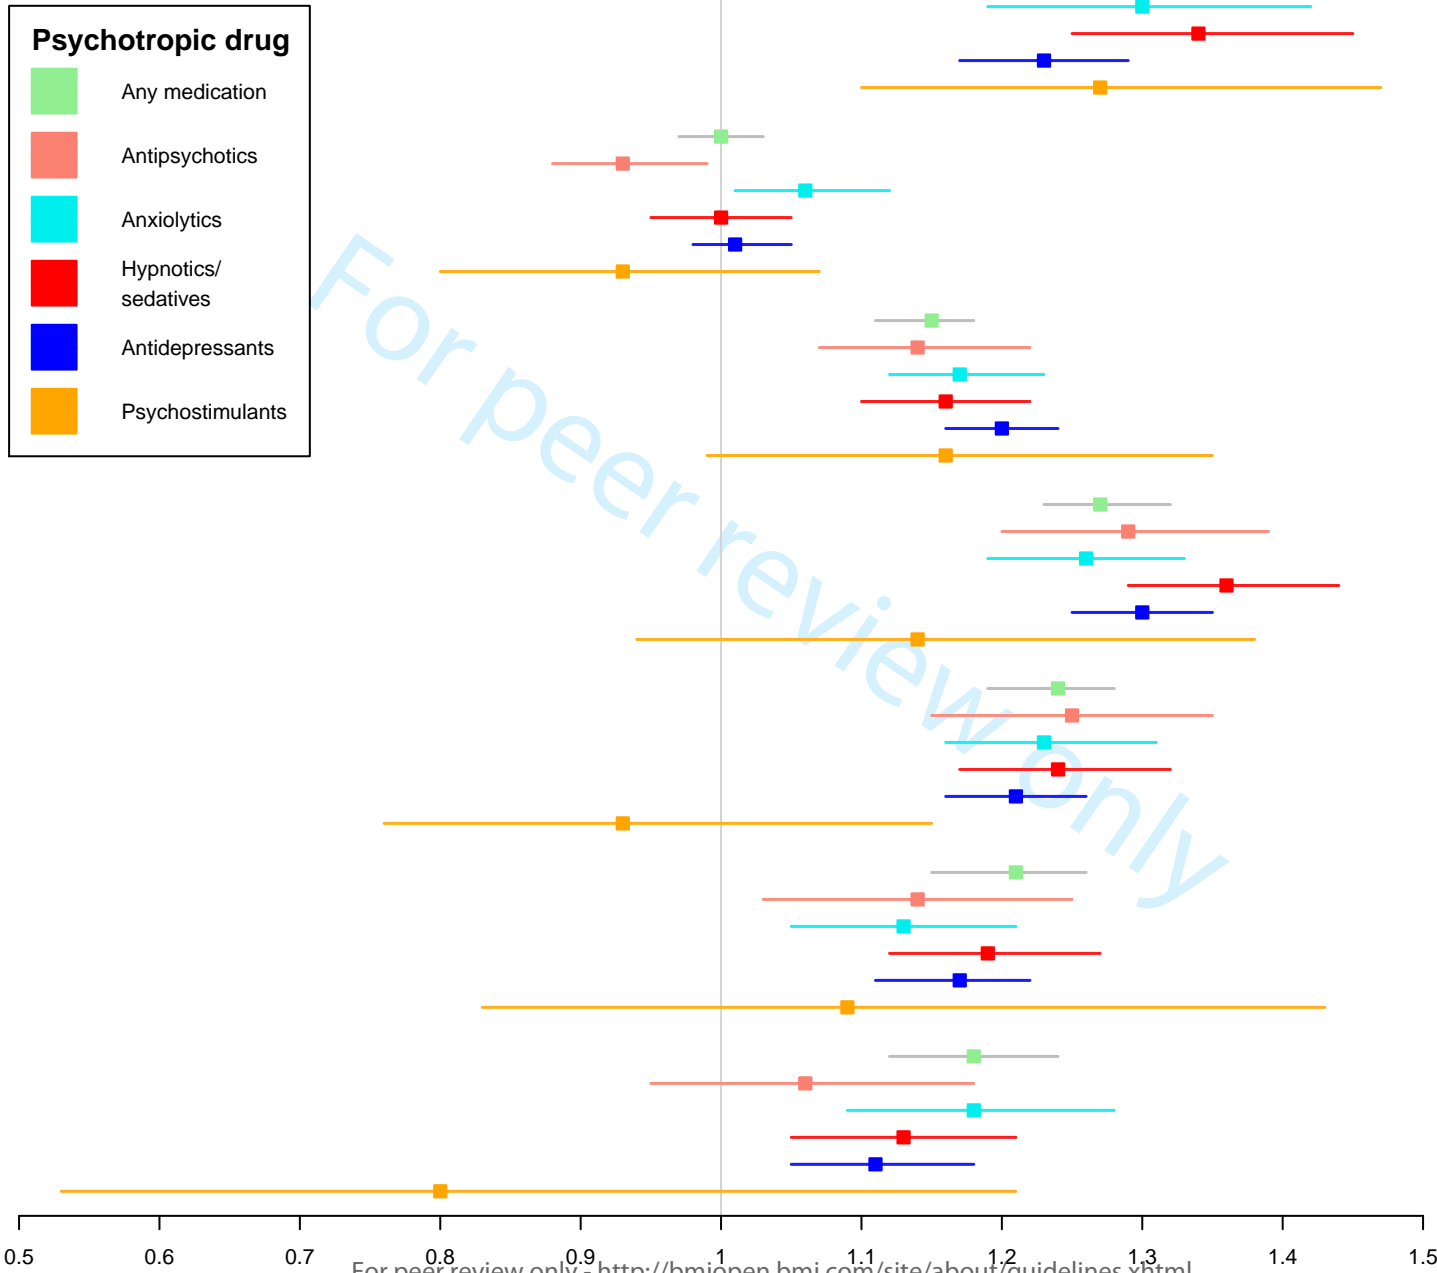

**Psychotropic drug**

- Any medication
- Antipsychotics
- Anxiolytics
- Hypnotics/sedatives
- Antidepressants
- Psychostimulants

| Age group | OR   | 95% CI     |
|-----------|------|------------|
| 1         | 1.27 | 1.22--1.33 |
| 2         | 1.14 | 1.06--1.23 |
| 3 15-19   | 1.3  | 1.19--1.42 |
| 4         | 1.34 | 1.25--1.45 |
| 5         | 1.23 | 1.17--1.29 |
| 6         | 1.27 | 1.1--1.47  |
| 7         | 1    | 0.97--1.03 |
| 8         | 0.93 | 0.88--0.99 |
| 9 20-24   | 1.06 | 1.01--1.12 |
| 10        | 1    | 0.95--1.05 |
| 11        | 1.01 | 0.98--1.05 |
| 12        | 0.93 | 0.8--1.07  |
| 13        | 1.15 | 1.11--1.18 |
| 14 25-29  | 1.14 | 1.07--1.22 |
| 15        | 1.17 | 1.12--1.23 |
| 16        | 1.16 | 1.1--1.22  |
| 17        | 1.2  | 1.16--1.24 |
| 18        | 1.16 | 0.99--1.35 |
| 19        | 1.27 | 1.23--1.32 |
| 20 30-34  | 1.29 | 1.2--1.39  |
| 21        | 1.26 | 1.19--1.33 |
| 22        | 1.36 | 1.29--1.44 |
| 23        | 1.3  | 1.25--1.35 |
| 24        | 1.3  | 1.25--1.35 |
| 25        | 1.14 | 0.94--1.38 |
| 26 35-39  | 1.24 | 1.19--1.28 |
| 27        | 1.25 | 1.15--1.35 |
| 28        | 1.23 | 1.16--1.31 |
| 29        | 1.24 | 1.17--1.32 |
| 30        | 1.21 | 1.16--1.26 |
| 31 40-44  | 1.21 | 1.15--1.26 |
| 32        | 1.14 | 1.03--1.25 |
| 33        | 1.13 | 1.05--1.21 |
| 34        | 1.19 | 1.12--1.27 |
| 35        | 1.17 | 1.11--1.22 |
| 36        | 1.09 | 0.83--1.43 |
| 37 45-49  | 1.18 | 1.12--1.24 |
| 38        | 1.06 | 0.95--1.18 |
| 39        | 1.18 | 1.09--1.28 |
| 40        | 1.13 | 1.05--1.21 |
| 41        | 1.19 | 1.12--1.27 |
| 42        | 1.17 | 1.11--1.22 |
| 43        | 1.11 | 1.05--1.18 |
| 44        | 0.8  | 0.53--1.21 |

**A) Antipsychotics**



**B) Anxiolytics**



**C) Hypnotics/Sedatives**

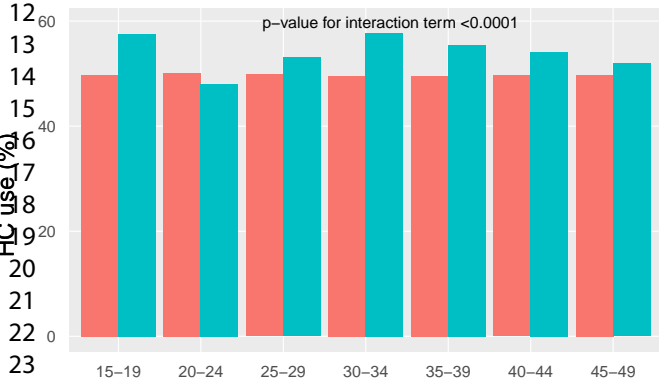

**D) Antidepressants**

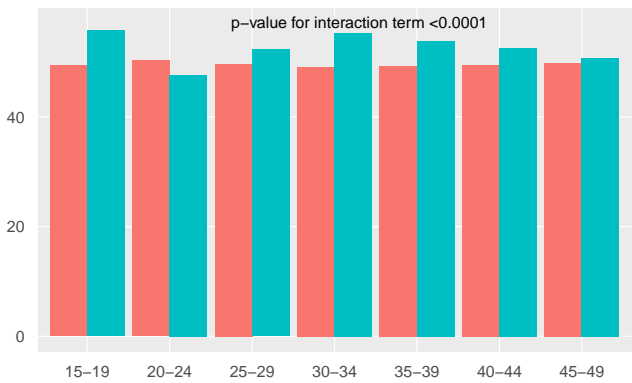

**E) Psychostimulants**



1  
2  
3  
4  
5  
6  
7  
8  
9  
10  
11  
12  
13  
14  
15  
16  
17  
18  
19  
20  
21  
22  
23  
24  
25  
26  
27  
28  
29  
30  
31  
32  
33  
34  
35  
36  
37  
38

One prescription

Two or more prescriptions

Class of psychotropic medication

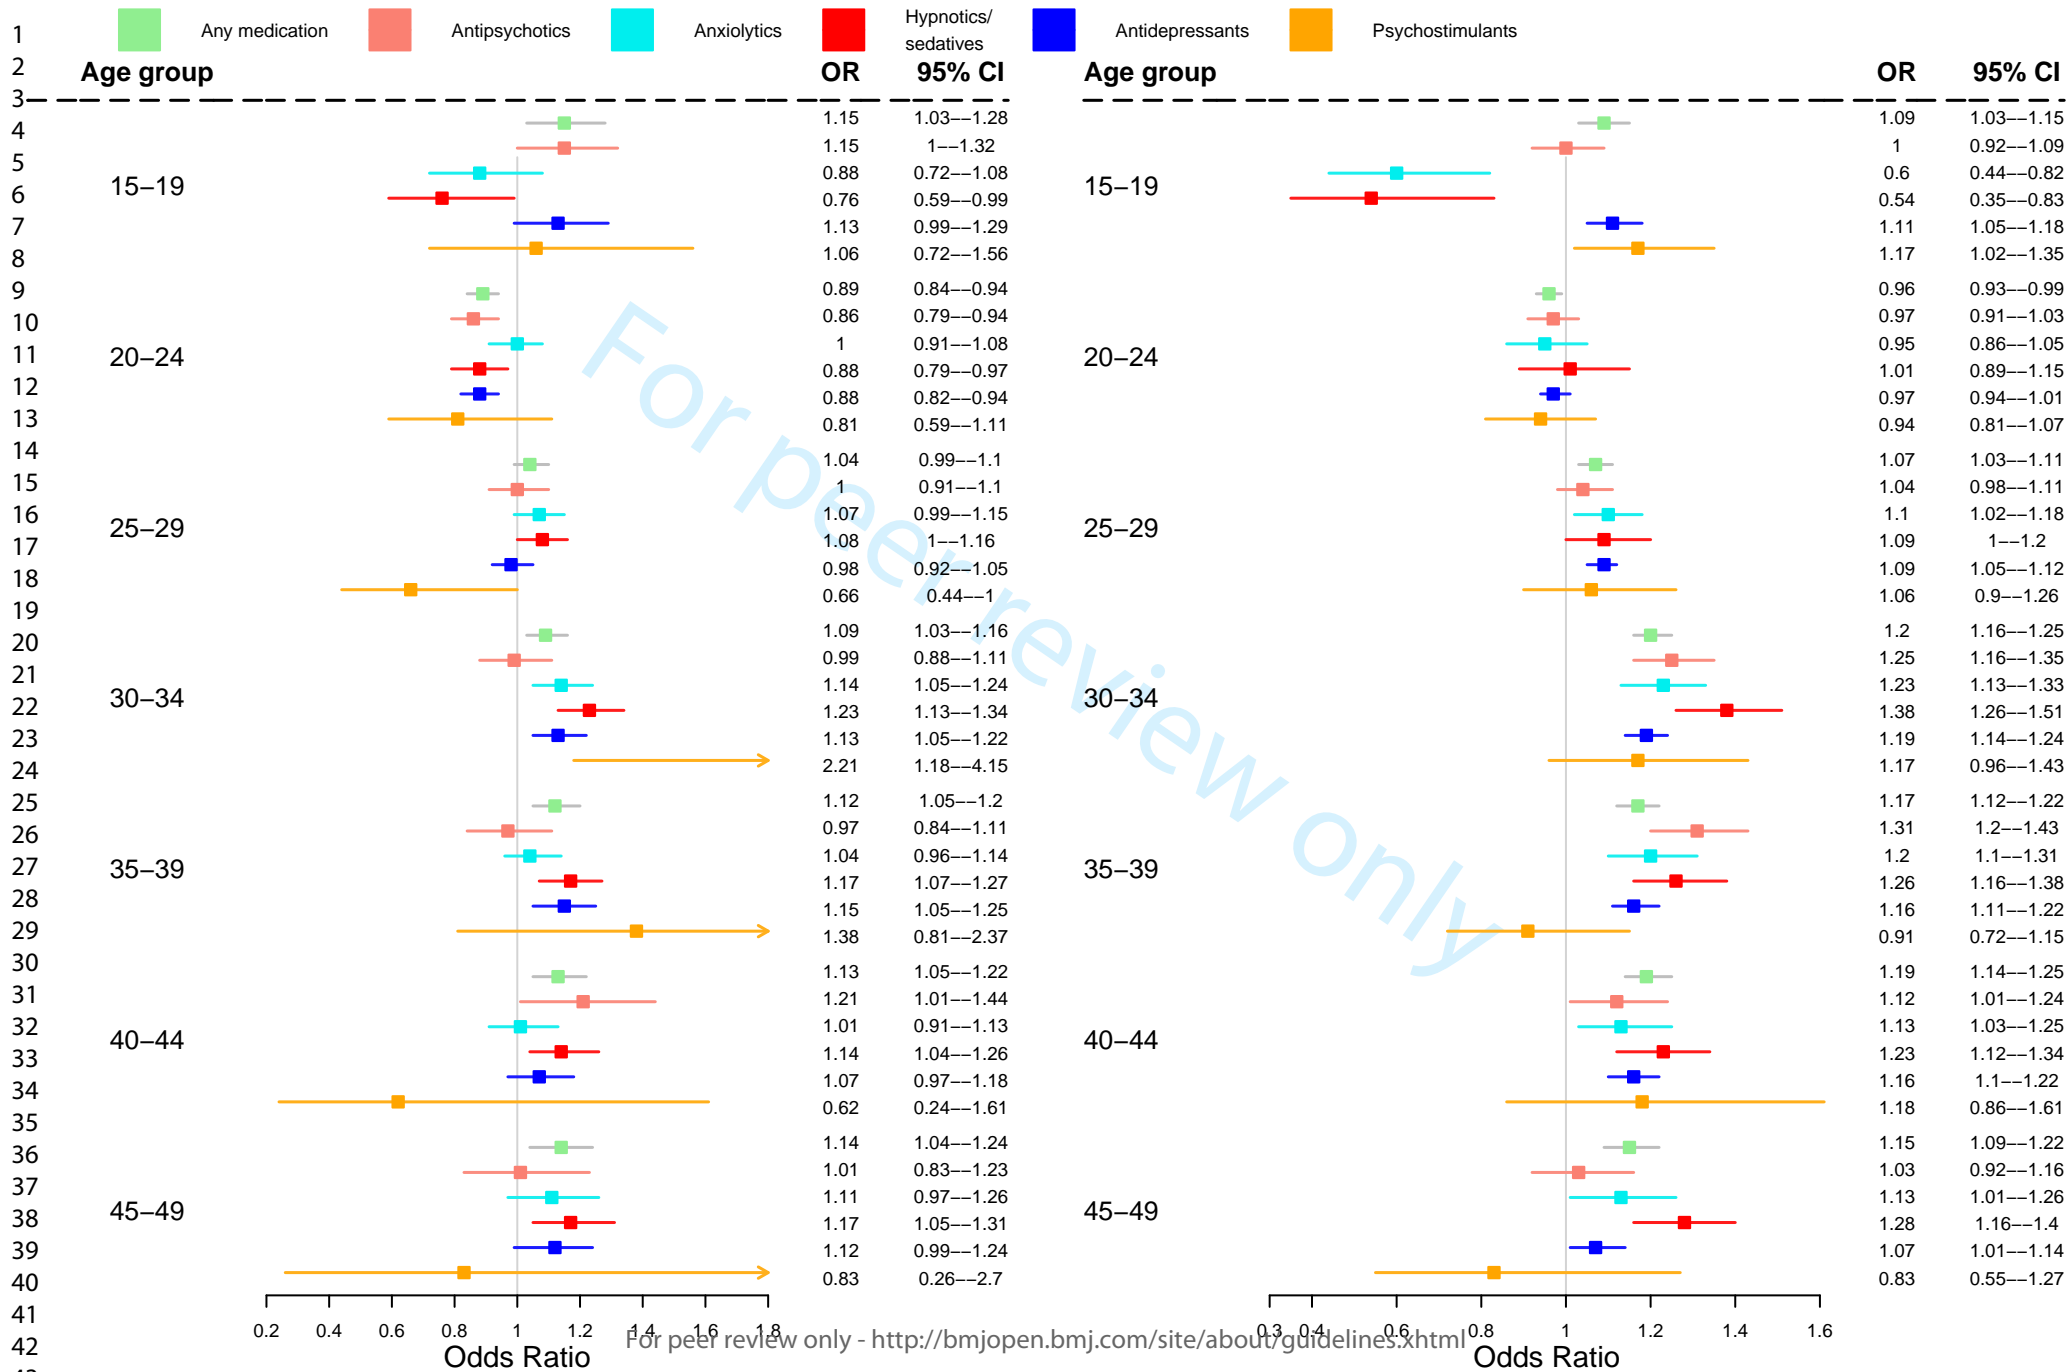

For peer review only

Odds Ratio For peer review only - <http://bmjopen.bmj.com/site/about/guidelines.xhtml> Odds Ratio

### A) Antipsychotics

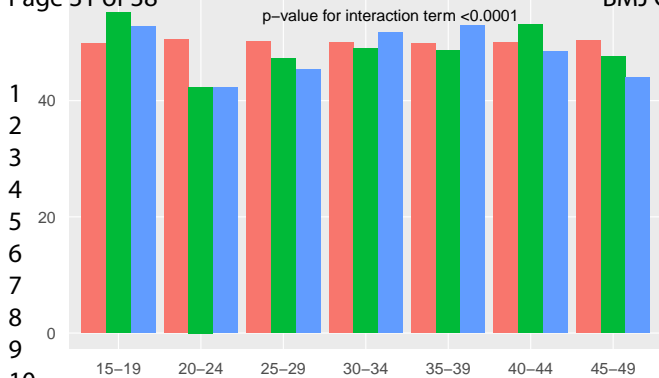

### B) Anxiolytics

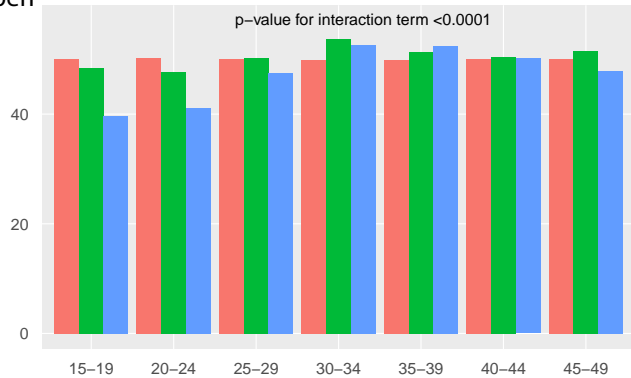

### C) Hypnotics/Sedatives

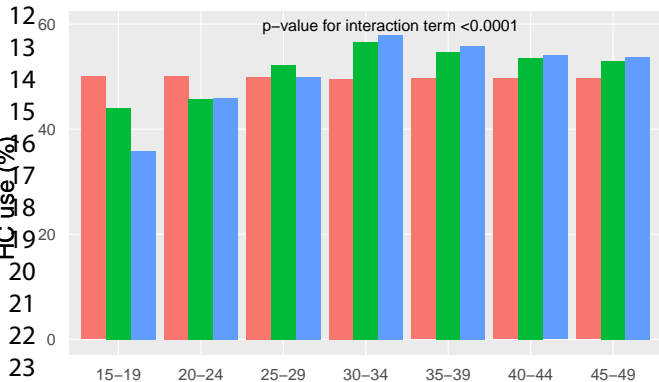

### D) Antidepressants

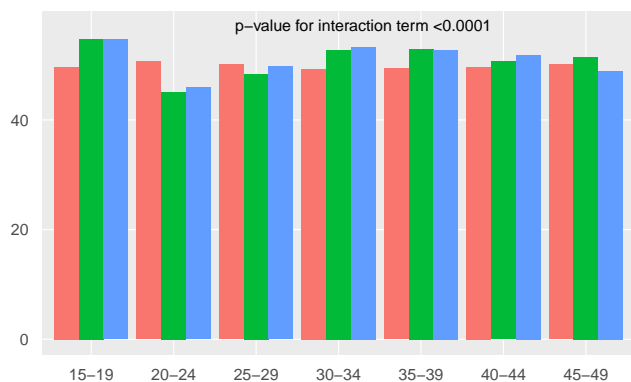

### E) Psychostimulants

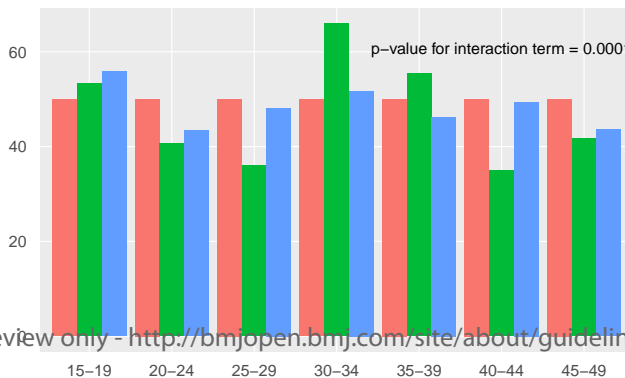

**Type of HC**

- Vaginal ring with progestogen and estrogen
- IUD with progestogen
- Progestogens and estrogens, fixed combinations
- Progestogens and estrogens, sequential preparations
- Progestogens (systemic use)
- Cyproterone and estrogen





**Supplementary Table 1. Associations between levels of use of psychotropic medications (based on quantiles of redeemed DDD) between 2013 and 2016, and HC use in 2017.**

| Class of psychotropic medication      | Level of use* | Model 1 |              |                 | Model 2 |              |                 | Model 3 |              |                 | Model 4 |              |                 |
|---------------------------------------|---------------|---------|--------------|-----------------|---------|--------------|-----------------|---------|--------------|-----------------|---------|--------------|-----------------|
|                                       |               | OR      | 95% CI       | <i>p</i> -value |
| Antipsychotics                        | Low           | 0.95    | 0.91 to 0.99 | 0.0056          | 1.00    | 0.96 to 1.04 | 0.975           | 1.01    | 0.97 to 1.05 | 0.740           | 1.00    | 0.96 to 1.04 | 0.916           |
|                                       | Intermediate  | 0.92    | 0.88 to 0.96 | 0.0001          | 0.99    | 0.95 to 1.04 | 0.714           | 1.03    | 0.99 to 1.08 | 0.158           | 1.03    | 0.99 to 1.08 | 0.176           |
|                                       | High          | 0.83    | 0.79 to 0.86 | <0.0001         | 0.90    | 0.87 to 0.94 | <0.0001         | 1.06    | 1.02 to 1.10 | 0.0050          | 1.06    | 1.01 to 1.11 | 0.0090          |
| Anxiolytics                           | Low           | 1.04    | 1.00 to 1.09 | 0.0418          | 1.05    | 1.01 to 1.09 | 0.0267          | 1.04    | 1.00 to 1.09 | 0.0557          | 1.03    | 0.99 to 1.08 | 0.117           |
|                                       | Intermediate  | 1.00    | 0.96 to 1.04 | 0.959           | 1.02    | 0.98 to 1.07 | 0.292           | 1.04    | 1.00 to 1.09 | 0.0507          | 1.04    | 1.00 to 1.09 | 0.074           |
|                                       | High          | 0.93    | 0.89 to 0.97 | 0.0008          | 1.01    | 0.97 to 1.06 | 0.545           | 1.14    | 1.09 to 1.19 | <0.0001         | 1.14    | 1.09 to 1.19 | <0.0001         |
| Hypnotics/<br>sedatives               | Low           | 1.13    | 1.09 to 1.17 | <0.0001         | 1.11    | 1.08 to 1.15 | <0.0001         | 1.08    | 1.05 to 1.12 | <0.0001         | 1.08    | 1.04 to 1.12 | <0.0001         |
|                                       | High          | 1.16    | 1.12 to 1.20 | <0.0001         | 1.16    | 1.12 to 1.21 | <0.0001         | 1.20    | 1.15 to 1.24 | <0.0001         | 1.21    | 1.16 to 1.25 | <0.0001         |
| Antidepressants                       | Low           | 1.00    | 0.98 to 1.02 | 0.9113          | 1.03    | 1.01 to 1.05 | 0.0168          | 1.02    | 1.00 to 1.05 | 0.084           | 1.02    | 1.00 to 1.05 | 0.098           |
|                                       | Intermediate  | 1.02    | 1.00 to 1.05 | 0.0543          | 1.05    | 1.03 to 1.08 | 0.0001          | 1.06    | 1.04 to 1.09 | <0.0001         | 1.06    | 1.04 to 1.09 | <0.0001         |
|                                       | High          | 1.02    | 1.00 to 1.05 | 0.0772          | 1.04    | 1.02 to 1.07 | 0.0014          | 1.10    | 1.08 to 1.13 | <0.0001         | 1.10    | 1.08 to 1.13 | <0.0001         |
| Psychostimulants                      | Low           | 0.88    | 0.79 to 0.98 | 0.019           | 0.94    | 0.84 to 1.05 | 0.261           | 0.96    | 0.86 to 1.07 | 0.415           | 0.95    | 0.85 to 1.06 | 0.394           |
|                                       | Intermediate  | 0.92    | 0.82 to 1.03 | 0.151           | 0.98    | 0.88 to 1.11 | 0.790           | 1.00    | 0.89 to 1.13 | 0.972           | 1.00    | 0.89 to 1.12 | 0.956           |
|                                       | High          | 1.03    | 0.92 to 1.15 | 0.674           | 1.11    | 0.99 to 1.24 | 0.071           | 1.13    | 1.00 to 1.26 | 0.043           | 1.12    | 1.00 to 1.26 | 0.046           |
| Psycholeptics and<br>psychoanaleptics | Low           | 1.22    | 1.10 to 1.36 | 0.0001          | 1.21    | 1.09 to 1.34 | 0.0004          | 1.19    | 1.07 to 1.32 | 0.0011          | 1.20    | 1.08 to 1.33 | 0.0010          |
|                                       | High          | 1.27    | 1.14-1.42    | <0.0003         | 1.29    | 1.15 to 1.44 | <0.0001         | 1.33    | 1.19 to 1.49 | <0.0001         | 1.34    | 1.19 to 1.50 | <0.0001         |

Model 1 is the unadjusted model; Model 2 is Model 1 adjusted for age group, education and marital status; Model 3 is Model 2 adjusted for socioeconomic status and income level; Model 4 is Model 3 adjusted for recent pregnancy (in 2017), abortion (in 2016-2017) and sterilization (before 2017). DDD, defined daily dose; HC, hormonal contraception.

1  
2 \* Level of use of psychotropic medications was based on quantiles of purchased DDD (tertiles for antipsychotics, anxiolytics, antidepressants and  
3 psychostimulants; 50<sup>th</sup> percentile for hypnotics/sedatives, and 60th percentile for psycholeptics and psychoanaleptics in combination.  
4  
5  
6  
7  
8  
9  
10  
11  
12  
13  
14  
15  
16  
17  
18  
19  
20  
21  
22  
23  
24  
25  
26  
27  
28  
29  
30  
31  
32  
33  
34  
35  
36  
37  
38  
39  
40  
41  
42  
43  
44  
45  
46

For peer review only

**Supplementary Table 2. Multinomial logistic regression models among HC users, showing the associations between levels of use of psychotropic medications (based on quantiles of redeemed DDD) between 2013 and 2016, and type of HC used in 2017.**

| Class of HC*                                                                    | Level of use <sup>†</sup> | Model 1 |              |         | Model 2 |              |         | Model 3 |              |         |
|---------------------------------------------------------------------------------|---------------------------|---------|--------------|---------|---------|--------------|---------|---------|--------------|---------|
|                                                                                 |                           | RRR     | 95% CI       | p-value | RRR     | 95% CI       | p-value | RRR     | 95% CI       | p-value |
| <b>Antipsychotics</b>                                                           |                           |         |              |         |         |              |         |         |              |         |
| <b>G02BA</b> IUD with progestogen                                               | Low                       | 0.94    | 0.85 to 1.04 | 0.238   | 0.94    | 0.84 to 1.04 | 0.204   | 1.03    | 0.94 to 1.13 | 0.543   |
|                                                                                 | Intermediate              | 1.18    | 1.05 to 1.31 | 0.0045  | 1.01    | 1.91 to 1.13 | 0.847   | 1.25    | 1.12 to 1.40 | 0.0001  |
|                                                                                 | High                      | 1.45    | 1.30 to 1.61 | <0.0001 | 1.14    | 1.02 to 1.27 | 0.021   | 1.92    | 1.73 to 2.12 | <0.0001 |
| <b>G02BB01</b> vaginal ring with progestogen and estrogen                       | Low                       | 1.04    | 0.92 to 1.16 | 0.557   | 0.92    | 0.82 to 1.04 | 0.185   | 0.92    | 0.82 to 1.03 | 0.155   |
|                                                                                 | Intermediate              | 1.08    | 0.95 to 1.24 | 0.247   | 1.27    | 1.13 to 1.42 | 0.0001  | 1.02    | 0.89 to 1.17 | 0.790   |
|                                                                                 | High                      | 0.99    | 0.85 to 1.14 | 0.838   | 0.90    | 0.78 to 1.03 | 0.112   | 1.92    | 1.71 to 2.15 | <0.0001 |
| <b>G03AB</b> Progestogens and estrogens, sequential preparations (systemic use) | Low                       | 0.92    | 0.77 to 1.10 | 0.364   | 1.14    | 0.98 to 1.32 | 0.086   | 1.03    | 0.88 to 1.19 | 0.730   |
|                                                                                 | Intermediate              | 1.24    | 1.03 to 1.49 | 0.023   | 0.88    | 0.73 to 1.06 | 0.187   | 0.27    | 0.19 to 0.38 | <0.0001 |
|                                                                                 | High                      | 1.35    | 1.12 to 1.62 | 0.0016  | 1.03    | 0.87 to 1.22 | 0.762   | 0.93    | 0.75 to 1.15 | 0.487   |
| <b>G03AC</b> Progestogens (systemic use)                                        | Low                       | 1.30    | 1.22 to 1.38 | <0.0001 | 1.00    | 0.94 to 1.07 | 0.960   | 0.70    | 0.65 to 0.76 | <0.0001 |
|                                                                                 | Intermediate              | 1.46    | 1.36 to 1.57 | <0.0001 | 0.96    | 0.89 to 1.04 | 0.341   | 1.58    | 1.48 to 1.70 | <0.0001 |
|                                                                                 | High                      | 2.10    | 1.96 to 2.25 | <0.0001 | 0.78    | 0.72 to 0.85 | <0.0001 | 1.19    | 1.10 to 1.29 | <0.0001 |
| <b>G03HB01</b> cyproterone and estrogen                                         | Low                       | 1.07    | 0.96 to 1.20 | 0.239   | 1.12    | 1.00 to 1.25 | 0.048   | 1.10    | 0.99 to 1.22 | 0.067   |
|                                                                                 | Intermediate              | 1.37    | 1.22 to 1.54 | <0.0001 | 0.86    | 0.75 to 0.98 | 0.028   | 1.43    | 1.28 to 1.61 | <0.0001 |
|                                                                                 | High                      | 1.52    | 1.35 to 1.72 | <0.0001 | 1.02    | 0.90 to 1.16 | 0.785   | 1.80    | 1.60 to 2.01 | <0.0001 |
| <b>Anxiolytics</b>                                                              |                           |         |              |         |         |              |         |         |              |         |
| <b>G02BA</b> IUD with progestogen                                               | Low                       | 1.55    | 1.40 to 1.71 | <0.0001 | 1.34    | 1.21 to 1.47 | <0.001  | 1.13    | 1.02 to 1.25 | 0.018   |
|                                                                                 | Intermediate              | 1.84    | 1.66 to 2.04 | <0.0001 | 1.01    | 0.91 to 1.13 | 0.855   | 0.98    | 0.88 to 1.10 | 0.739   |
|                                                                                 | High                      | 1.75    | 1.56 to 1.96 | <0.0001 | 0.74    | 0.65 to 0.84 | <0.0001 | 1.13    | 1.02 to 1.26 | 0.026   |
|                                                                                 | Low                       | 1.67    | 1.49 to 1.87 | <0.0001 | 1.41    | 1.27 to 1.58 | <0.0001 | 0.88    | 0.78 to 1.01 | 0.061   |

|                                                                                 |              |      |              |         |      |              |         |      |              |         |
|---------------------------------------------------------------------------------|--------------|------|--------------|---------|------|--------------|---------|------|--------------|---------|
| <b>G02BB01</b> vaginal ring with progestogen and estrogen                       | Intermediate | 1.58 | 1.40 to 1.78 | <0.0001 | 1.00 | 0.88 to 1.14 | 0.985   | 0.82 | 0.71 to 0.94 | 0.0042  |
|                                                                                 | High         | 1.47 | 1.28 to 1.68 | <0.0001 | 0.97 | 0.85 to 1.11 | 0.658   | 0.75 | 0.65 to 0.86 | 0.0001  |
| <b>G03AB</b> Progestogens and estrogens, sequential preparations (systemic use) | Low          | 1.34 | 1.12 to 1.60 | 0.0014  | 0.60 | 0.48 to 0.75 | <0.0001 | 0.86 | 0.71 to 1.03 | 0.099   |
|                                                                                 | Intermediate | 1.92 | 1.63 to 2.26 | <0.0001 | 0.86 | 0.71 to 1.04 | 0.119   | 0.99 | 0.83 to 1.18 | 0.930   |
|                                                                                 | High         | 1.93 | 1.62 to 2.30 | <0.0001 | 0.97 | 0.80 to 1.17 | 0.750   | 0.29 | 0.21 to 0.40 | <0.0001 |
| <b>G03AC</b> Progestogens (systemic use)                                        | Low          | 1.62 | 1.51 to 1.74 | <0.0001 | 0.93 | 0.86 to 1.00 | 0.065   | 1.10 | 1.02 to 1.18 | 0.0125  |
|                                                                                 | Intermediate | 1.75 | 1.62 to 1.88 | <0.0001 | 1.01 | 0.94 to 1.09 | 0.764   | 1.10 | 1.02 to 1.18 | 0.0138  |
|                                                                                 | High         | 2.16 | 2.01 to 2.34 | <0.0001 | 0.85 | 0.78 to 0.92 | 0.0001  | 0.86 | 0.79 to 0.93 | 0.0001  |
| <b>G03HB01</b> cyproterone and estrogen                                         | Low          | 1.42 | 1.26 to 1.60 | <0.0001 | 1.46 | 1.32 to 1.63 | <0.0001 | 0.91 | 0.81 to 1.04 | 0.156   |
|                                                                                 | Intermediate | 1.68 | 1.49 to 1.89 | <0.0001 | 1.14 | 1.01 to 1.28 | 0.0038  | 0.88 | 0.78 to 1.01 | 0.062   |
|                                                                                 | High         | 2.04 | 1.81 to 2.30 | <0.0001 | 1.63 | 1.46 to 1.82 | <0.0001 | 0.62 | 0.53 to 0.72 | <0.0001 |
| <b>Hypnotics/Sedatives</b>                                                      |              |      |              |         |      |              |         |      |              |         |
| <b>G02BA</b> IUD with progestogen                                               | Low          | 1.70 | 1.56 to 1.85 | <0.0001 | 0.88 | 0.80 to 0.97 | 0.010   | 0.70 | 0.64 to 0.78 | <0.0001 |
|                                                                                 | High         | 2.14 | 1.96 to 2.33 | <0.0001 | 1.54 | 1.41 to 1.67 | <0.0001 | 0.88 | 0.79 to 0.97 | 0.012   |
| <b>G02BB01</b> vaginal ring with progestogen and estrogen                       | Low          | 1.63 | 1.48 to 1.79 | <0.0001 | 1.11 | 1.00 to 1.22 | 0.0514  | 1.16 | 1.06 to 1.28 | 0.0020  |
|                                                                                 | High         | 1.70 | 1.52 to 1.89 | <0.0001 | 1.00 | 0.89 to 1.12 | 0.948   | 1.55 | 1.41 to 1.71 | <0.0001 |
| <b>G03AB</b> Progestogens and estrogens, sequential preparations (systemic use) | Low          | 1.89 | 1.66 to 2.16 | <0.0001 | 0.76 | 0.65 to 0.89 | 0.0008  | 1.27 | 1.12 to 1.45 | 0.0004  |
|                                                                                 | High         | 2.69 | 2.37 to 3.06 | <0.0001 | 1.27 | 1.10 to 1.46 | 0.0011  | 0.95 | 0.80 to 1.12 | 0.523   |
| <b>G03AC</b> Progestogens (systemic use)                                        | Low          | 1.60 | 1.51 to 1.70 | <0.0001 | 1.07 | 1.01 to 1.14 | 0.0329  | 0.79 | 0.74 to 0.84 | <0.0001 |
|                                                                                 | High         | 1.93 | 1.81 to 2.06 | <0.0001 | 1.06 | 0.99 to 1.13 | 0.093   | 1.35 | 1.27 to 1.44 | 0.007   |
| <b>G03HB01</b> cyproterone and estrogen                                         | Low          | 1.48 | 1.34 to 1.64 | <0.0001 | 1.10 | 1.00 to 1.22 | 0.060   | 0.93 | 0.84 to 1.03 | 0.138   |
|                                                                                 | High         | 2.03 | 1.84 to 2.24 | <0.0001 | 1.41 | 1.28 to 1.56 | <0.0001 | 1.06 | 0.95 to 1.19 | 0.282   |
| <b>Antidepressants</b>                                                          |              |      |              |         |      |              |         |      |              |         |
| <b>G02BA</b> IUD with progestogen                                               | Low          | 1.30 | 1.23 to 1.39 | <0.0001 | 0.95 | 0.89 to 1.01 | 0.085   | 0.88 | 0.82 to 0.94 | 0.0001  |
|                                                                                 | Intermediate | 1.37 | 1.29 to 1.46 | <0.0001 | 1.29 | 1.22 to 1.36 | <0.0001 | 0.95 | 0.89 to 1.01 | 0.089   |

|                                                                                 |              |      |              |         |      |              |         |      |              |         |
|---------------------------------------------------------------------------------|--------------|------|--------------|---------|------|--------------|---------|------|--------------|---------|
|                                                                                 | High         | 1.73 | 1.63 to 1.83 | <0.0001 | 0.76 | 0.71 to 0.81 | <0.0001 | 0.89 | 0.84 to 0.95 | 0.0005  |
| <b>G02BB01</b> vaginal ring with progestogen and estrogen                       | Low          | 1.40 | 1.31 to 1.50 | <0.0001 | 0.89 | 0.83 to 0.96 | 0.0223  | 1.06 | 0.99 to 1.13 | 0.121   |
|                                                                                 | Intermediate | 1.31 | 1.22 to 1.40 | <0.0001 | 1.00 | 0.93 to 1.07 | 0.919   | 1.06 | 0.99 to 1.14 | 0.102   |
|                                                                                 | High         | 1.45 | 1.36 to 1.56 | <0.0001 | 1.16 | 1.09 to 1.24 | <0.0001 | 0.95 | 0.88 to 1.02 | 0.132   |
| <b>G03AB</b> Progestogens and estrogens, sequential preparations (systemic use) | Low          | 1.46 | 1.33 to 1.61 | <0.0001 | 1.00 | 0.91 to 1.11 | 0.933   | 1.02 | 0.93 to 1.13 | 0.664   |
|                                                                                 | Intermediate | 1.38 | 1.25 to 1.52 | <0.0001 | 0.79 | 0.71 to 0.88 | <0.0001 | 0.90 | 0.81 to 0.99 | 0.0381  |
|                                                                                 | High         | 1.74 | 1.58 to 1.91 | <0.0001 | 0.98 | 0.89 to 1.09 | 0.738   | 0.95 | 0.85 to 1.05 | 0.268   |
| <b>G03AC</b> Progestogens (systemic use)                                        | Low          | 1.49 | 1.44 to 1.56 | <0.0001 | 1.00 | 0.96 to 1.04 | 0.887   | 0.98 | 0.94 to 1.02 | 0.387   |
|                                                                                 | Intermediate | 1.42 | 1.37 to 1.48 | <0.0001 | 1.02 | 0.98 to 1.07 | 0.362   | 1.01 | 0.97 to 1.06 | 0.544   |
|                                                                                 | High         | 1.79 | 1.72 to 1.87 | <0.0001 | 0.89 | 0.85 to 0.93 | <0.0001 | 0.90 | 0.87 to 0.94 | <0.0001 |
| <b>G03HB01</b> cyproterone and estrogen                                         | Low          | 1.19 | 1.11 to 1.28 | <0.0001 | 0.98 | 0.92 to 1.05 | 0.609   | 1.00 | 0.93 to 1.07 | 0.972   |
|                                                                                 | Intermediate | 1.29 | 1.21 to 1.39 | <0.0001 | 1.24 | 1.16 to 1.32 | <0.0001 | 0.89 | 0.82 to 0.95 | 0.0011  |
|                                                                                 | High         | 1.59 | 1.48 to 1.70 | <0.0001 | 0.99 | 0.92 to 1.06 | 0.786   | 1.01 | 0.94 to 1.08 | 0.836   |

Model 1 is the unadjusted model; Model 2 is Model 1 adjusted for age, marital and socioeconomic status, education and income level; Model 3 is Model 2 adjusted for abortion and pregnancy in 2016-2017.

\*Reference: G03AA, Progestogens and estrogens, fixed combinations (systemic use).

† Level of use of psychotropic medications was based on quantiles of purchased DDD (tertiles for antipsychotics, anxiolytics, antidepressants and psychostimulants; 50<sup>th</sup> percentile for hypnotics/sedatives, and 60<sup>th</sup> percentile for psycholeptics and psychoanaleptics in combination.

DDD, defined daily dose; HC, hormonal contraception; RRR, relative risk ratio.

**STROBE 2007 (v4) checklist of items to be included in reports of observational studies in epidemiology\***  
**Checklist for cohort, case-control, and cross-sectional studies (combined)**

| Section/Topic             | Item # | Recommendation                                                                                                                                                                                                                                                                                                                                                                                                                                                         | Reported on page # |
|---------------------------|--------|------------------------------------------------------------------------------------------------------------------------------------------------------------------------------------------------------------------------------------------------------------------------------------------------------------------------------------------------------------------------------------------------------------------------------------------------------------------------|--------------------|
| Title and abstract        | 1      | (a) Indicate the study's design with a commonly used term in the title or the abstract                                                                                                                                                                                                                                                                                                                                                                                 | 1                  |
|                           |        | (b) Provide in the abstract an informative and balanced summary of what was done and what was found                                                                                                                                                                                                                                                                                                                                                                    | 2                  |
| <b>Introduction</b>       |        |                                                                                                                                                                                                                                                                                                                                                                                                                                                                        |                    |
| Background/rationale      | 2      | Explain the scientific background and rationale for the investigation being reported                                                                                                                                                                                                                                                                                                                                                                                   | 4                  |
| Objectives                | 3      | State specific objectives, including any pre-specified hypotheses                                                                                                                                                                                                                                                                                                                                                                                                      | 4                  |
| <b>Methods</b>            |        |                                                                                                                                                                                                                                                                                                                                                                                                                                                                        |                    |
| Study design              | 4      | Present key elements of study design early in the paper                                                                                                                                                                                                                                                                                                                                                                                                                | 5                  |
| Setting                   | 5      | Describe the setting, locations, and relevant dates, including periods of recruitment, exposure, follow-up, and data collection                                                                                                                                                                                                                                                                                                                                        | 5-6                |
| Participants              | 6      | (a) <i>Cohort study</i> —Give the eligibility criteria, and the sources and methods of selection of participants. Describe methods of follow-up<br><i>Case-control study</i> —Give the eligibility criteria, and the sources and methods of case ascertainment and control selection. Give the rationale for the choice of cases and controls<br><i>Cross-sectional study</i> —Give the eligibility criteria, and the sources and methods of selection of participants | 5                  |
|                           |        | (b) <i>Cohort study</i> —For matched studies, give matching criteria and number of exposed and unexposed<br><i>Case-control study</i> —For matched studies, give matching criteria and the number of controls per case                                                                                                                                                                                                                                                 | 5                  |
| Variables                 | 7      | Clearly define all outcomes, exposures, predictors, potential confounders, and effect modifiers. Give diagnostic criteria, if applicable                                                                                                                                                                                                                                                                                                                               | 5-6                |
| Data sources/ measurement | 8*     | For each variable of interest, give sources of data and details of methods of assessment (measurement). Describe comparability of assessment methods if there is more than one group                                                                                                                                                                                                                                                                                   | 5-6                |
| Bias                      | 9      | Describe any efforts to address potential sources of bias                                                                                                                                                                                                                                                                                                                                                                                                              | 6,7                |
| Study size                | 10     | Explain how the study size was arrived at                                                                                                                                                                                                                                                                                                                                                                                                                              | 5                  |
| Quantitative variables    | 11     | Explain how quantitative variables were handled in the analyses. If applicable, describe which groupings were chosen and why                                                                                                                                                                                                                                                                                                                                           | 5-7                |
| Statistical methods       | 12     | (a) Describe all statistical methods, including those used to control for confounding                                                                                                                                                                                                                                                                                                                                                                                  | 6,7                |
|                           |        | (b) Describe any methods used to examine subgroups and interactions                                                                                                                                                                                                                                                                                                                                                                                                    | 6,7                |
|                           |        | (c) Explain how missing data were addressed                                                                                                                                                                                                                                                                                                                                                                                                                            |                    |
|                           |        | (d) <i>Cohort study</i> —If applicable, explain how loss to follow-up was addressed<br><i>Case-control study</i> —If applicable, explain how matching of cases and controls was addressed                                                                                                                                                                                                                                                                              | 5,6                |

|                          |     |                                                                                                                                                                                                              |        |
|--------------------------|-----|--------------------------------------------------------------------------------------------------------------------------------------------------------------------------------------------------------------|--------|
|                          |     | <i>Cross-sectional study</i> —If applicable, describe analytical methods taking account of sampling strategy                                                                                                 |        |
|                          |     | (e) Describe any sensitivity analyses                                                                                                                                                                        | 6,7    |
| <b>Results</b>           |     |                                                                                                                                                                                                              |        |
| Participants             | 13* | (a) Report numbers of individuals at each stage of study—eg numbers potentially eligible, examined for eligibility, confirmed eligible, included in the study, completing follow-up, and analysed            | 5      |
|                          |     | (b) Give reasons for non-participation at each stage                                                                                                                                                         |        |
|                          |     | (c) Consider use of a flow diagram                                                                                                                                                                           |        |
| Descriptive data         | 14* | (a) Give characteristics of study participants (eg demographic, clinical, social) and information on exposures and potential confounders                                                                     | 6,7,12 |
|                          |     | (b) Indicate number of participants with missing data for each variable of interest                                                                                                                          |        |
|                          |     | (c) <i>Cohort study</i> —Summarise follow-up time (eg, average and total amount)                                                                                                                             |        |
| Outcome data             | 15* | <i>Cohort study</i> —Report numbers of outcome events or summary measures over time                                                                                                                          |        |
|                          |     | <i>Case-control study</i> —Report numbers in each exposure category, or summary measures of exposure                                                                                                         | 6-14   |
|                          |     | <i>Cross-sectional study</i> —Report numbers of outcome events or summary measures                                                                                                                           |        |
| Main results             | 16  | (a) Give unadjusted estimates and, if applicable, confounder-adjusted estimates and their precision (eg, 95% confidence interval). Make clear which confounders were adjusted for and why they were included | 6-14   |
|                          |     | (b) Report category boundaries when continuous variables were categorized                                                                                                                                    | 6,7    |
|                          |     | (c) If relevant, consider translating estimates of relative risk into absolute risk for a meaningful time period                                                                                             |        |
| Other analyses           | 17  | Report other analyses done—eg analyses of subgroups and interactions, and sensitivity analyses                                                                                                               | 7-14   |
| <b>Discussion</b>        |     |                                                                                                                                                                                                              |        |
| Key results              | 18  | Summarise key results with reference to study objectives                                                                                                                                                     | 14     |
| Limitations              | 19  | Discuss limitations of the study, taking into account sources of potential bias or imprecision. Discuss both direction and magnitude of any potential bias                                                   | 14,15  |
| Interpretation           | 20  | Give a cautious overall interpretation of results considering objectives, limitations, multiplicity of analyses, results from similar studies, and other relevant evidence                                   | 15,16  |
| Generalisability         | 21  | Discuss the generalisability (external validity) of the study results                                                                                                                                        | 15,16  |
| <b>Other information</b> |     |                                                                                                                                                                                                              |        |
| Funding                  | 22  | Give the source of funding and the role of the funders for the present study and, if applicable, for the original study on which the present article is based                                                | 19     |

\*Give information separately for cases and controls in case-control studies and, if applicable, for exposed and unexposed groups in cohort and cross-sectional studies.

**Note:** An Explanation and Elaboration article discusses each checklist item and gives methodological background and published examples of transparent reporting. The STROBE checklist is best used in conjunction with this article (freely available on the Web sites of PLoS Medicine at <http://www.plosmedicine.org/>, Annals of Internal Medicine at <http://www.annals.org/>, and Epidemiology at <http://www.epidem.com/>). Information on the STROBE Initiative is available at [www.strobe-statement.org](http://www.strobe-statement.org).
