# Supplementary material for: Associations between use of psychotropic medications and use of hormonal contraception among girls and women aged 15–49 years in Finland: a nationwide, register-based, matched case–control study
Source: PubMed Central journal article supplement — BMJ Open. 2022 Feb 22;12(2):e053837. doi: 10.1136/bmjopen-2021-053837 (PMC8867378; doi:10.1136/bmjopen-2021-053837), 2022-02-22
Supplement: bmjopen-2021-053837supp007.pdf [file bmjopen-2021-053837supp007.pdf]

**A) Antipsychotics**

Psychotropic drug use ■ no ■ occasional ■ regular

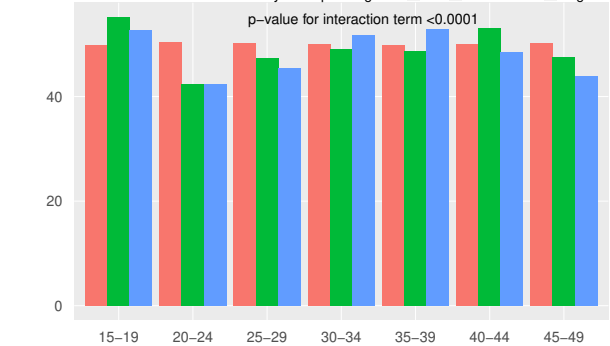

**B) Anxiolytics**

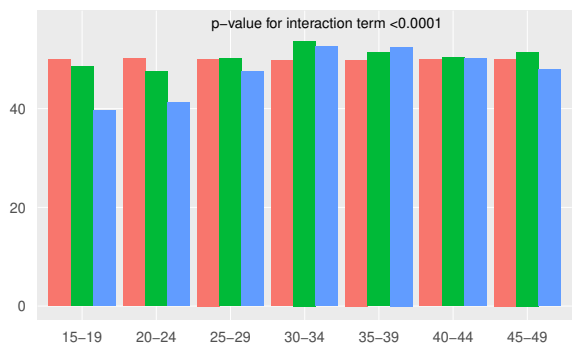

**C) Hypnotics/Sedatives**

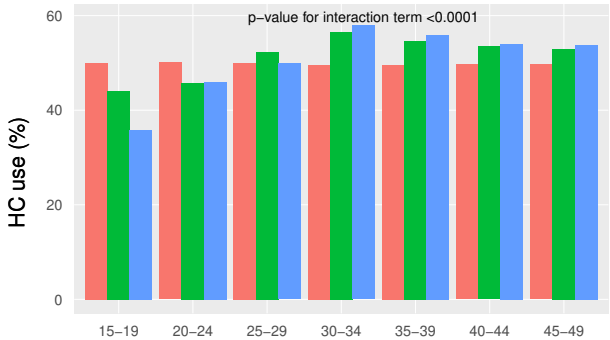

**D) Antidepressants**

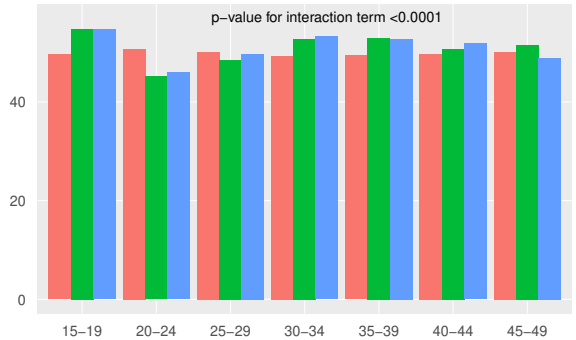

**E) Psychostimulants**

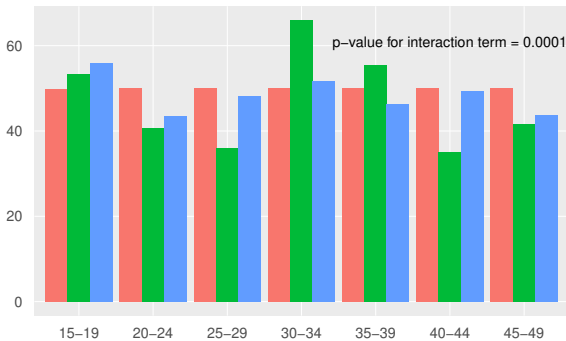

Age category (years)
