# Supplementary material for: Associations between use of psychotropic medications and use of hormonal contraception among girls and women aged 15–49 years in Finland: a nationwide, register-based, matched case–control study
Source: PubMed Central journal article supplement — BMJ Open. 2022 Feb 22;12(2):e053837. doi: 10.1136/bmjopen-2021-053837 (PMC8867378; doi:10.1136/bmjopen-2021-053837), 2022-02-22
Supplement: bmjopen-2021-053837supp009.pdf [file bmjopen-2021-053837supp009.pdf]

**Supplementary Table 2. Multinomial logistic regression models among HC users, showing the associations between levels of use of psychotropic medications (based on quantiles of redeemed DDD) between 2013 and 2016, and type of HC used in 2017.**

| Class of HC*                                                             | Level of use <sup>†</sup> | Model 1 |              |         | Model 2 |              |         | Model 3 |              |         |
|--------------------------------------------------------------------------|---------------------------|---------|--------------|---------|---------|--------------|---------|---------|--------------|---------|
|                                                                          |                           | RRR     | 95% CI       | p-value | RRR     | 95% CI       | p-value | RRR     | 95% CI       | p-value |
| <b>Antipsychotics</b>                                                    |                           |         |              |         |         |              |         |         |              |         |
| G02BA IUD with progestogen                                               | Low                       | 0.94    | 0.85 to 1.04 | 0.238   | 0.94    | 0.84 to 1.04 | 0.204   | 1.03    | 0.94 to 1.13 | 0.543   |
|                                                                          | Intermediate              | 1.18    | 1.05 to 1.31 | 0.0045  | 1.01    | 1.91 to 1.13 | 0.847   | 1.25    | 1.12 to 1.40 | 0.0001  |
|                                                                          | High                      | 1.45    | 1.30 to 1.61 | <0.0001 | 1.14    | 1.02 to 1.27 | 0.021   | 1.92    | 1.73 to 2.12 | <0.0001 |
| G02BB01 vaginal ring with progestogen and estrogen                       | Low                       | 1.04    | 0.92 to 1.16 | 0.557   | 0.92    | 0.82 to 1.04 | 0.185   | 0.92    | 0.82 to 1.03 | 0.155   |
|                                                                          | Intermediate              | 1.08    | 0.95 to 1.24 | 0.247   | 1.27    | 1.13 to 1.42 | 0.0001  | 1.02    | 0.89 to 1.17 | 0.790   |
|                                                                          | High                      | 0.99    | 0.85 to 1.14 | 0.838   | 0.90    | 0.78 to 1.03 | 0.112   | 1.92    | 1.71 to 2.15 | <0.0001 |
| G03AB Progestogens and estrogens, sequential preparations (systemic use) | Low                       | 0.92    | 0.77 to 1.10 | 0.364   | 1.14    | 0.98 to 1.32 | 0.086   | 1.03    | 0.88 to 1.19 | 0.730   |
|                                                                          | Intermediate              | 1.24    | 1.03 to 1.49 | 0.023   | 0.88    | 0.73 to 1.06 | 0.187   | 0.27    | 0.19 to 0.38 | <0.0001 |
|                                                                          | High                      | 1.35    | 1.12 to 1.62 | 0.0016  | 1.03    | 0.87 to 1.22 | 0.762   | 0.93    | 0.75 to 1.15 | 0.487   |
| G03AC Progestogens (systemic use)                                        | Low                       | 1.30    | 1.22 to 1.38 | <0.0001 | 1.00    | 0.94 to 1.07 | 0.960   | 0.70    | 0.65 to 0.76 | <0.0001 |
|                                                                          | Intermediate              | 1.46    | 1.36 to 1.57 | <0.0001 | 0.96    | 0.89 to 1.04 | 0.341   | 1.58    | 1.48 to 1.70 | <0.0001 |
|                                                                          | High                      | 2.10    | 1.96 to 2.25 | <0.0001 | 0.78    | 0.72 to 0.85 | <0.0001 | 1.19    | 1.10 to 1.29 | <0.0001 |
| G03HB01 cyproterone and estrogen                                         | Low                       | 1.07    | 0.96 to 1.20 | 0.239   | 1.12    | 1.00 to 1.25 | 0.048   | 1.10    | 0.99 to 1.22 | 0.067   |
|                                                                          | Intermediate              | 1.37    | 1.22 to 1.54 | <0.0001 | 0.86    | 0.75 to 0.98 | 0.028   | 1.43    | 1.28 to 1.61 | <0.0001 |
|                                                                          | High                      | 1.52    | 1.35 to 1.72 | <0.0001 | 1.02    | 0.90 to 1.16 | 0.785   | 1.80    | 1.60 to 2.01 | <0.0001 |
| <b>Anxiolytics</b>                                                       |                           |         |              |         |         |              |         |         |              |         |
| G02BA IUD with progestogen                                               | Low                       | 1.55    | 1.40 to 1.71 | <0.0001 | 1.34    | 1.21 to 1.47 | <0.001  | 1.13    | 1.02 to 1.25 | 0.018   |
|                                                                          | Intermediate              | 1.84    | 1.66 to 2.04 | <0.0001 | 1.01    | 0.91 to 1.13 | 0.855   | 0.98    | 0.88 to 1.10 | 0.739   |
|                                                                          | High                      | 1.75    | 1.56 to 1.96 | <0.0001 | 0.74    | 0.65 to 0.84 | <0.0001 | 1.13    | 1.02 to 1.26 | 0.026   |
|                                                                          | Low                       | 1.67    | 1.49 to 1.87 | <0.0001 | 1.41    | 1.27 to 1.58 | <0.0001 | 0.88    | 0.78 to 1.01 | 0.061   |

|                                                                                 |              |      |              |         |      |              |         |      |              |         |
|---------------------------------------------------------------------------------|--------------|------|--------------|---------|------|--------------|---------|------|--------------|---------|
| <b>G02BB01</b> vaginal ring with progestogen and estrogen                       | Intermediate | 1.58 | 1.40 to 1.78 | <0.0001 | 1.00 | 0.88 to 1.14 | 0.985   | 0.82 | 0.71 to 0.94 | 0.0042  |
|                                                                                 | High         | 1.47 | 1.28 to 1.68 | <0.0001 | 0.97 | 0.85 to 1.11 | 0.658   | 0.75 | 0.65 to 0.86 | 0.0001  |
| <b>G03AB</b> Progestogens and estrogens, sequential preparations (systemic use) | Low          | 1.34 | 1.12 to 1.60 | 0.0014  | 0.60 | 0.48 to 0.75 | <0.0001 | 0.86 | 0.71 to 1.03 | 0.099   |
|                                                                                 | Intermediate | 1.92 | 1.63 to 2.26 | <0.0001 | 0.86 | 0.71 to 1.04 | 0.119   | 0.99 | 0.83 to 1.18 | 0.930   |
|                                                                                 | High         | 1.93 | 1.62 to 2.30 | <0.0001 | 0.97 | 0.80 to 1.17 | 0.750   | 0.29 | 0.21 to 0.40 | <0.0001 |
| <b>G03AC</b> Progestogens (systemic use)                                        | Low          | 1.62 | 1.51 to 1.74 | <0.0001 | 0.93 | 0.86 to 1.00 | 0.065   | 1.10 | 1.02 to 1.18 | 0.0125  |
|                                                                                 | Intermediate | 1.75 | 1.62 to 1.88 | <0.0001 | 1.01 | 0.94 to 1.09 | 0.764   | 1.10 | 1.02 to 1.18 | 0.0138  |
|                                                                                 | High         | 2.16 | 2.01 to 2.34 | <0.0001 | 0.85 | 0.78 to 0.92 | 0.0001  | 0.86 | 0.79 to 0.93 | 0.0001  |
| <b>G03HB01</b> cyproterone and estrogen                                         | Low          | 1.42 | 1.26 to 1.60 | <0.0001 | 1.46 | 1.32 to 1.63 | <0.0001 | 0.91 | 0.81 to 1.04 | 0.156   |
|                                                                                 | Intermediate | 1.68 | 1.49 to 1.89 | <0.0001 | 1.14 | 1.01 to 1.28 | 0.0038  | 0.88 | 0.78 to 1.01 | 0.062   |
|                                                                                 | High         | 2.04 | 1.81 to 2.30 | <0.0001 | 1.63 | 1.46 to 1.82 | <0.0001 | 0.62 | 0.53 to 0.72 | <0.0001 |
| <b>Hypnotics/Sedatives</b>                                                      |              |      |              |         |      |              |         |      |              |         |
| <b>G02BA</b> IUD with progestogen                                               | Low          | 1.70 | 1.56 to 1.85 | <0.0001 | 0.88 | 0.80 to 0.97 | 0.010   | 0.70 | 0.64 to 0.78 | <0.0001 |
|                                                                                 | High         | 2.14 | 1.96 to 2.33 | <0.0001 | 1.54 | 1.41 to 1.67 | <0.0001 | 0.88 | 0.79 to 0.97 | 0.012   |
| <b>G02BB01</b> vaginal ring with progestogen and estrogen                       | Low          | 1.63 | 1.48 to 1.79 | <0.0001 | 1.11 | 1.00 to 1.22 | 0.0514  | 1.16 | 1.06 to 1.28 | 0.0020  |
|                                                                                 | High         | 1.70 | 1.52 to 1.89 | <0.0001 | 1.00 | 0.89 to 1.12 | 0.948   | 1.55 | 1.41 to 1.71 | <0.0001 |
| <b>G03AB</b> Progestogens and estrogens, sequential preparations (systemic use) | Low          | 1.89 | 1.66 to 2.16 | <0.0001 | 0.76 | 0.65 to 0.89 | 0.0008  | 1.27 | 1.12 to 1.45 | 0.0004  |
|                                                                                 | High         | 2.69 | 2.37 to 3.06 | <0.0001 | 1.27 | 1.10 to 1.46 | 0.0011  | 0.95 | 0.80 to 1.12 | 0.523   |
| <b>G03AC</b> Progestogens (systemic use)                                        | Low          | 1.60 | 1.51 to 1.70 | <0.0001 | 1.07 | 1.01 to 1.14 | 0.0329  | 0.79 | 0.74 to 0.84 | <0.0001 |
|                                                                                 | High         | 1.93 | 1.81 to 2.06 | <0.0001 | 1.06 | 0.99 to 1.13 | 0.093   | 1.35 | 1.27 to 1.44 | 0.007   |
| <b>G03HB01</b> cyproterone and estrogen                                         | Low          | 1.48 | 1.34 to 1.64 | <0.0001 | 1.10 | 1.00 to 1.22 | 0.060   | 0.93 | 0.84 to 1.03 | 0.138   |
|                                                                                 | High         | 2.03 | 1.84 to 2.24 | <0.0001 | 1.41 | 1.28 to 1.56 | <0.0001 | 1.06 | 0.95 to 1.19 | 0.282   |
| <b>Antidepressants</b>                                                          |              |      |              |         |      |              |         |      |              |         |
| <b>G02BA</b> IUD with progestogen                                               | Low          | 1.30 | 1.23 to 1.39 | <0.0001 | 0.95 | 0.89 to 1.01 | 0.085   | 0.88 | 0.82 to 0.94 | 0.0001  |
|                                                                                 | Intermediate | 1.37 | 1.29 to 1.46 | <0.0001 | 1.29 | 1.22 to 1.36 | <0.0001 | 0.95 | 0.89 to 1.01 | 0.089   |

|                                                                                 |              |      |              |         |      |              |         |      |              |         |
|---------------------------------------------------------------------------------|--------------|------|--------------|---------|------|--------------|---------|------|--------------|---------|
|                                                                                 | High         | 1.73 | 1.63 to 1.83 | <0.0001 | 0.76 | 0.71 to 0.81 | <0.0001 | 0.89 | 0.84 to 0.95 | 0.0005  |
| <b>G02BB01</b> vaginal ring with progestogen and estrogen                       | Low          | 1.40 | 1.31 to 1.50 | <0.0001 | 0.89 | 0.83 to 0.96 | 0.0223  | 1.06 | 0.99 to 1.13 | 0.121   |
|                                                                                 | Intermediate | 1.31 | 1.22 to 1.40 | <0.0001 | 1.00 | 0.93 to 1.07 | 0.919   | 1.06 | 0.99 to 1.14 | 0.102   |
|                                                                                 | High         | 1.45 | 1.36 to 1.56 | <0.0001 | 1.16 | 1.09 to 1.24 | <0.0001 | 0.95 | 0.88 to 1.02 | 0.132   |
| <b>G03AB</b> Progestogens and estrogens, sequential preparations (systemic use) | Low          | 1.46 | 1.33 to 1.61 | <0.0001 | 1.00 | 0.91 to 1.11 | 0.933   | 1.02 | 0.93 to 1.13 | 0.664   |
|                                                                                 | Intermediate | 1.38 | 1.25 to 1.52 | <0.0001 | 0.79 | 0.71 to 0.88 | <0.0001 | 0.90 | 0.81 to 0.99 | 0.0381  |
|                                                                                 | High         | 1.74 | 1.58 to 1.91 | <0.0001 | 0.98 | 0.89 to 1.09 | 0.738   | 0.95 | 0.85 to 1.05 | 0.268   |
| <b>G03AC</b> Progestogens (systemic use)                                        | Low          | 1.49 | 1.44 to 1.56 | <0.0001 | 1.00 | 0.96 to 1.04 | 0.887   | 0.98 | 0.94 to 1.02 | 0.387   |
|                                                                                 | Intermediate | 1.42 | 1.37 to 1.48 | <0.0001 | 1.02 | 0.98 to 1.07 | 0.362   | 1.01 | 0.97 to 1.06 | 0.544   |
|                                                                                 | High         | 1.79 | 1.72 to 1.87 | <0.0001 | 0.89 | 0.85 to 0.93 | <0.0001 | 0.90 | 0.87 to 0.94 | <0.0001 |
| <b>G03HB01</b> cyproterone and estrogen                                         | Low          | 1.19 | 1.11 to 1.28 | <0.0001 | 0.98 | 0.92 to 1.05 | 0.609   | 1.00 | 0.93 to 1.07 | 0.972   |
|                                                                                 | Intermediate | 1.29 | 1.21 to 1.39 | <0.0001 | 1.24 | 1.16 to 1.32 | <0.0001 | 0.89 | 0.82 to 0.95 | 0.0011  |
|                                                                                 | High         | 1.59 | 1.48 to 1.70 | <0.0001 | 0.99 | 0.92 to 1.06 | 0.786   | 1.01 | 0.94 to 1.08 | 0.836   |

Model 1 is the unadjusted model; Model 2 is Model 1 adjusted for age, marital and socioeconomic status, education and income level; Model 3 is Model 2 adjusted for abortion and pregnancy in 2016-2017.

\*Reference: G03AA, Progestogens and estrogens, fixed combinations (systemic use).

† Level of use of psychotropic medications was based on quantiles of purchased DDD (tertiles for antipsychotics, anxiolytics, antidepressants and psychostimulants; 50<sup>th</sup> percentile for hypnotics/sedatives, and 60<sup>th</sup> percentile for psycholeptics and psychoanaleptics in combination.

DDD, defined daily dose; HC, hormonal contraception; RRR, relative risk ratio.
