# Supplementary figures and images for: Associations between use of psychotropic medications and use of hormonal contraception among girls and women aged 15–49 years in Finland: a nationwide, register-based, matched case–control study
Source: PubMed Central journal article supplement — BMJ Open. 2022 Feb 22;12(2):e053837. doi: 10.1136/bmjopen-2021-053837 (PMC8867378; doi:10.1136/bmjopen-2021-053837), 2022-02-22

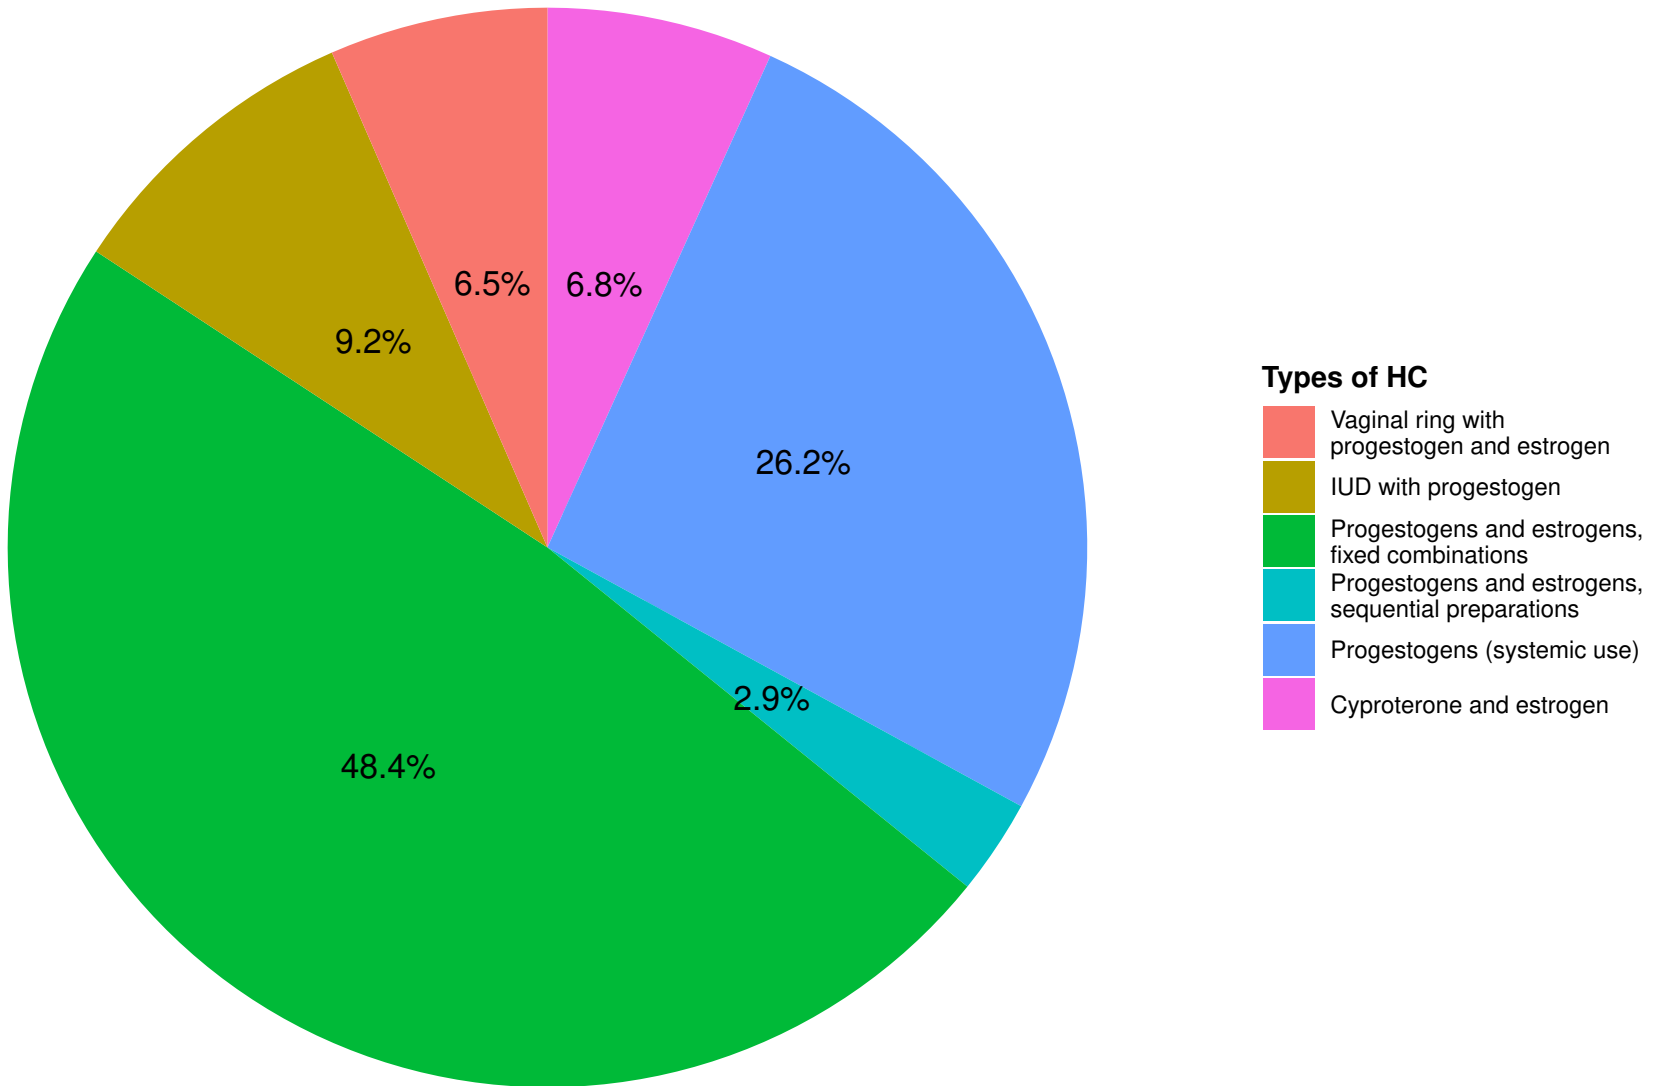

Supplement: bmjopen-2021-053837supp002.pdf [file bmjopen-2021-053837supp002.pdf]

Age group

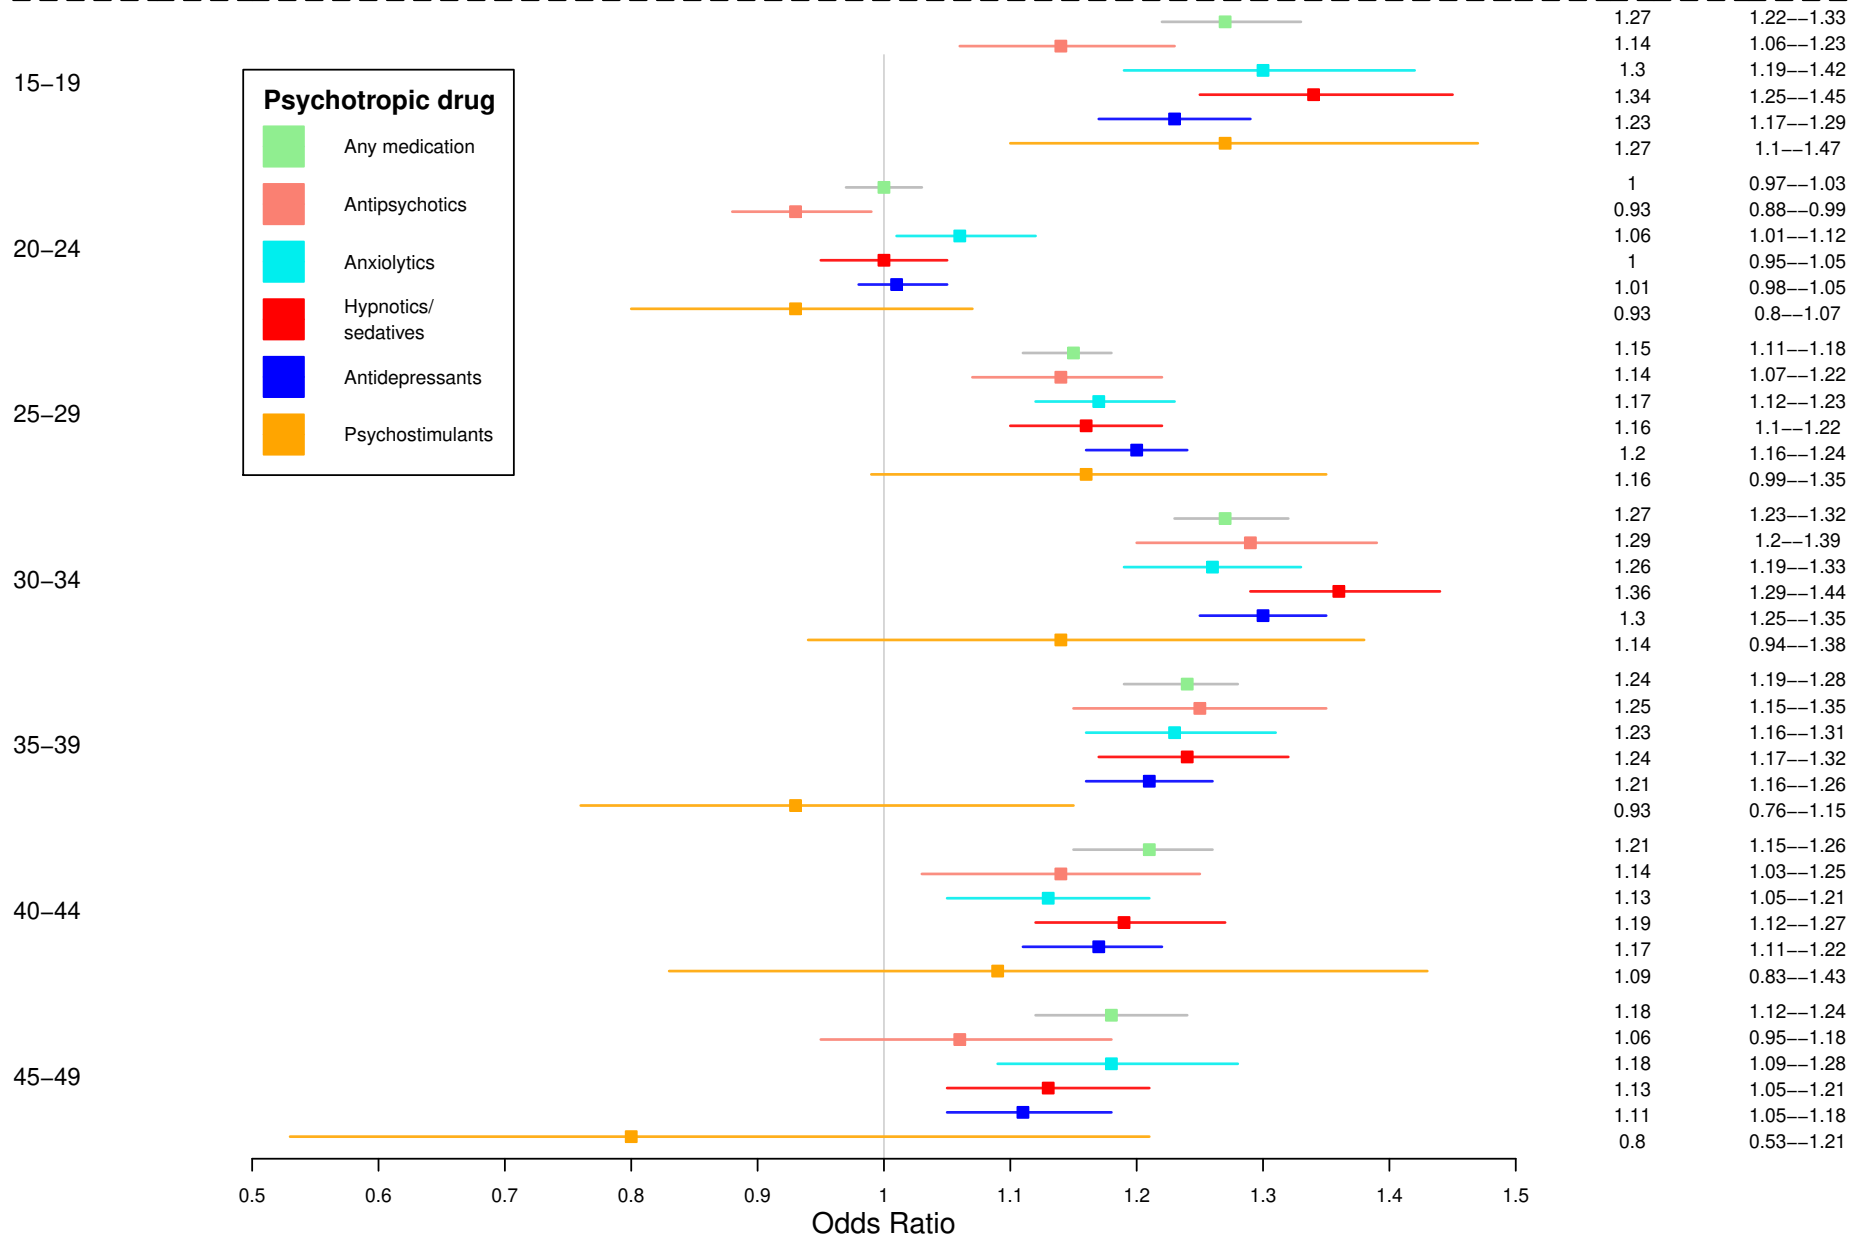

Supplement: bmjopen-2021-053837supp003.pdf [file bmjopen-2021-053837supp003.pdf]

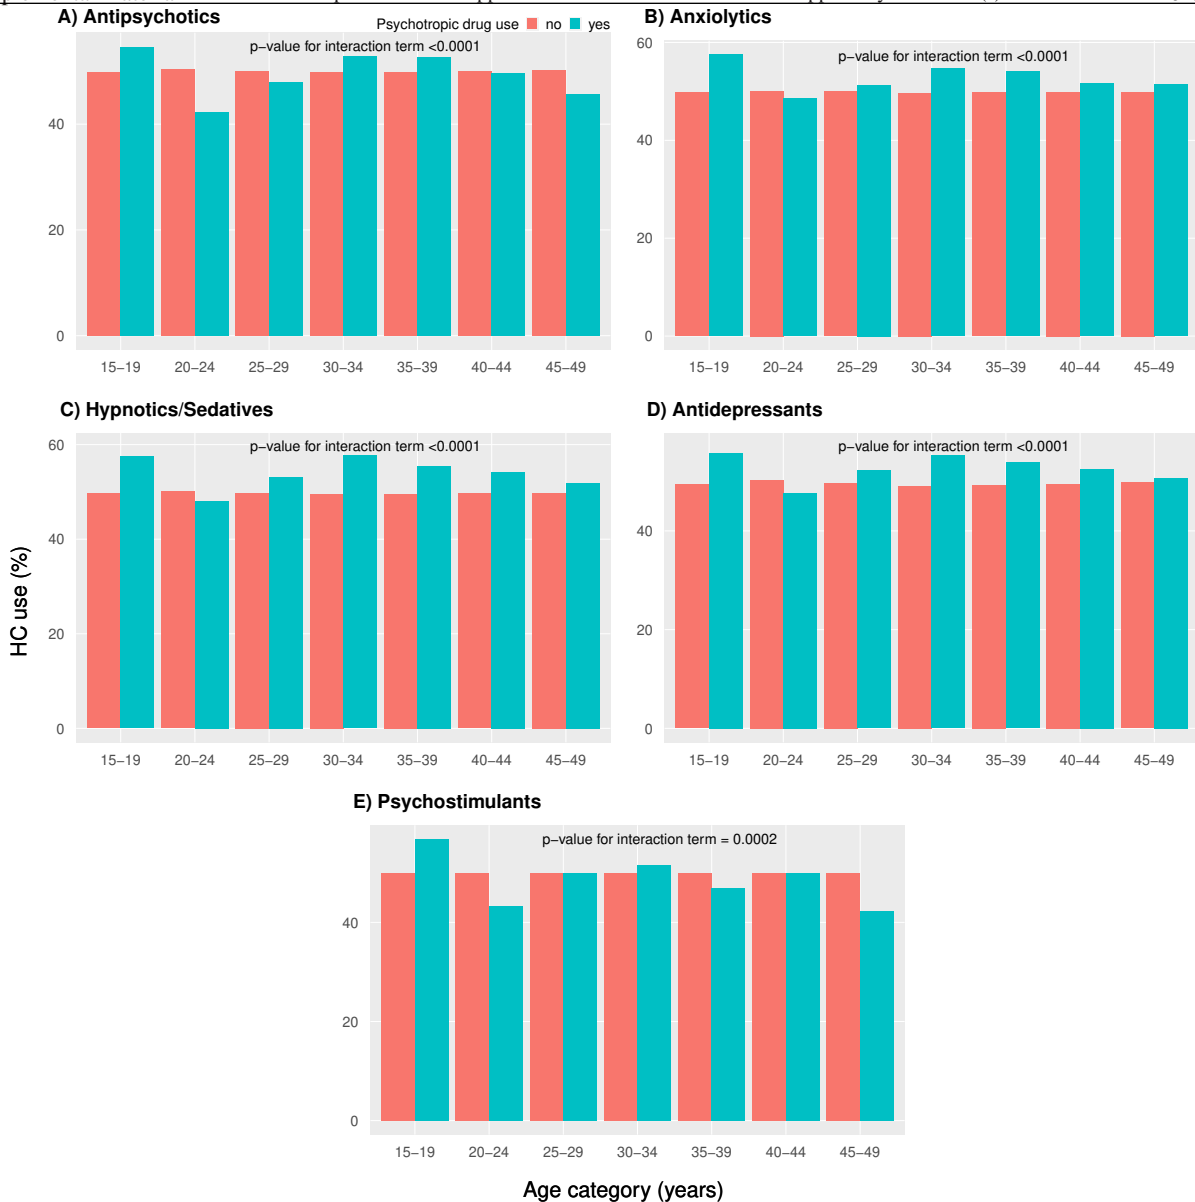

Supplement: bmjopen-2021-053837supp004.pdf [file bmjopen-2021-053837supp004.pdf]

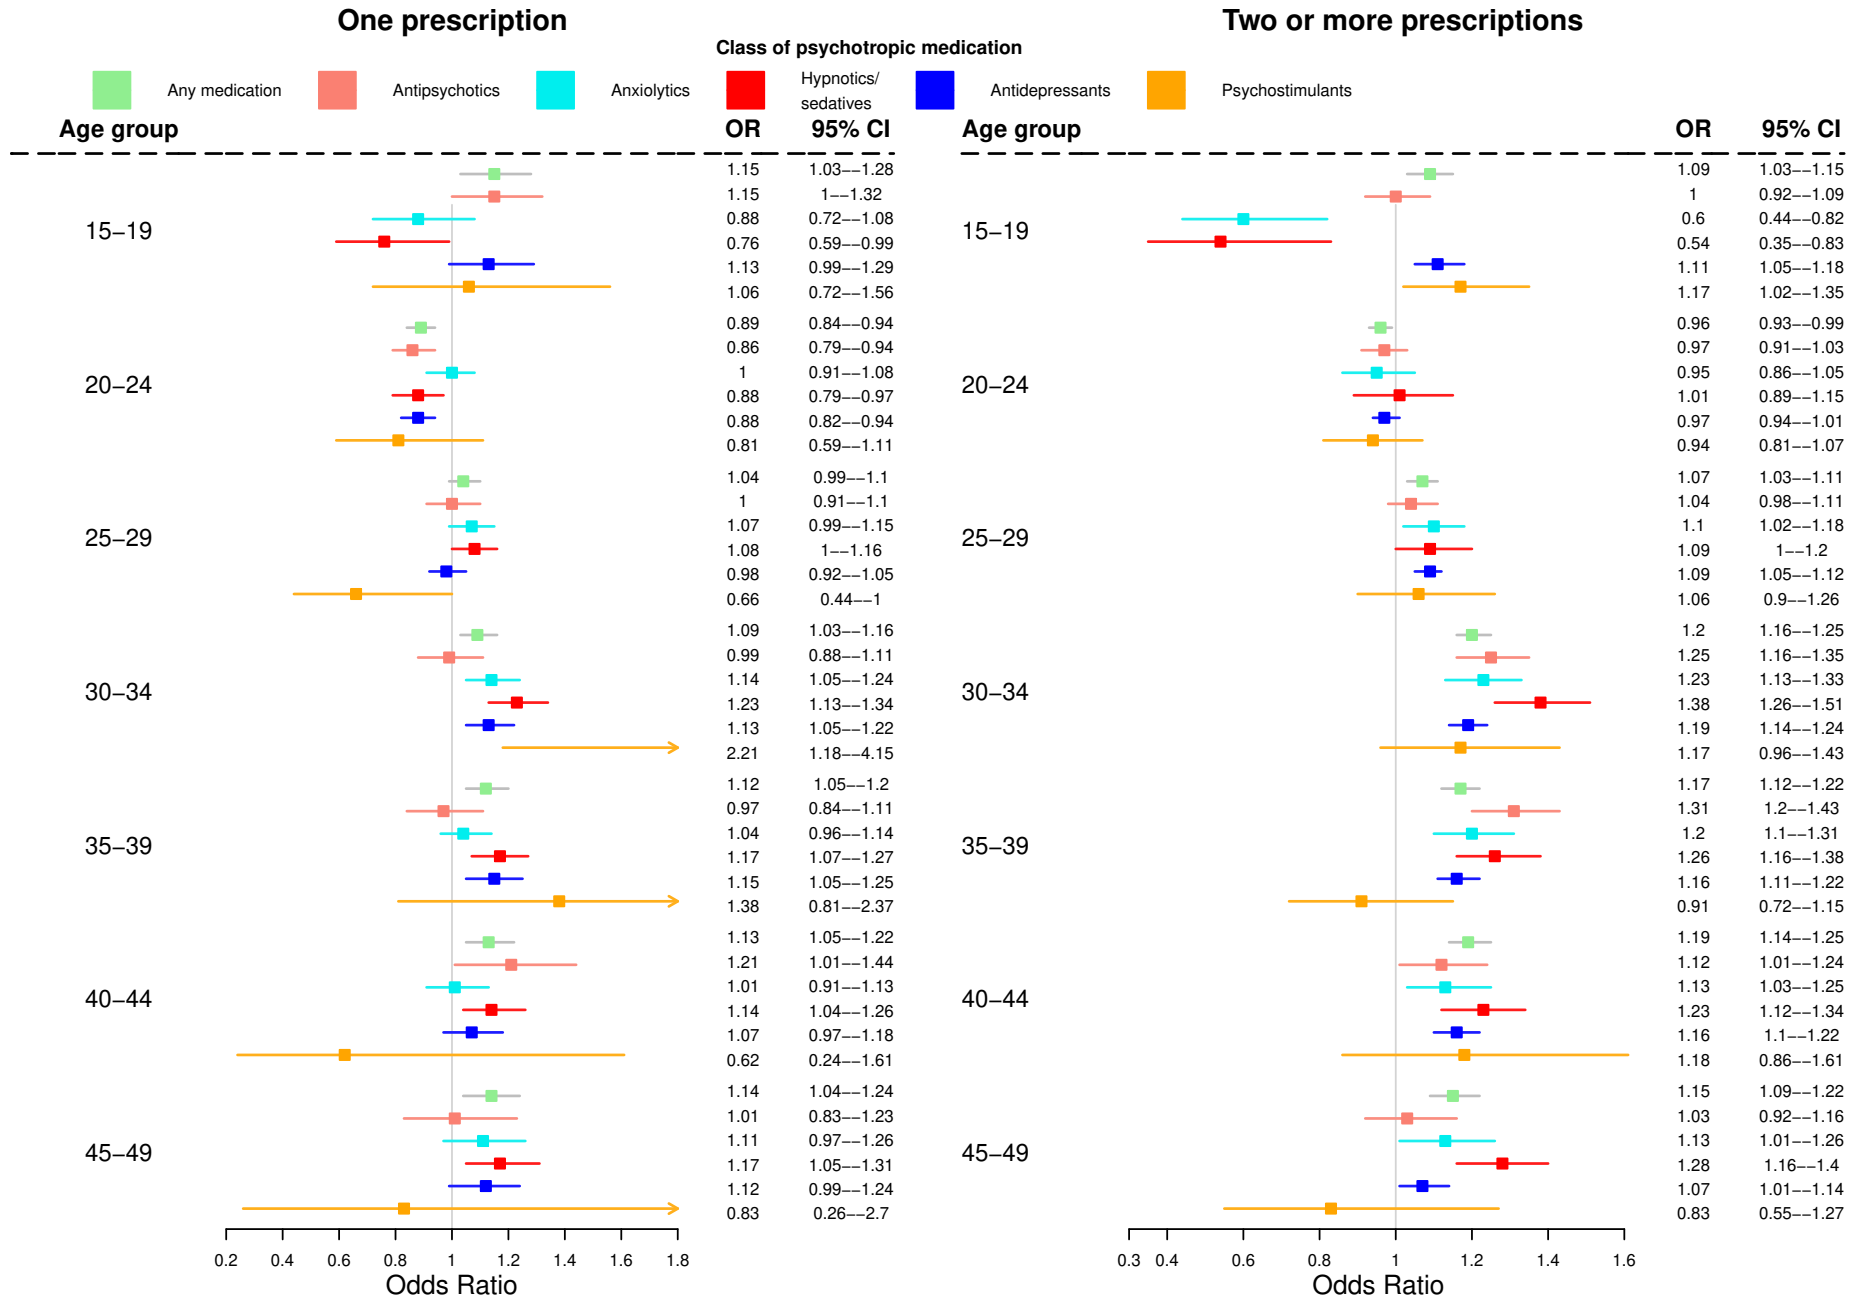

Supplement: bmjopen-2021-053837supp006.pdf [file bmjopen-2021-053837supp006.pdf]
